# Supplementary material
Source: PubMed Central journal article supplement (PMC11483690)
Supplement: SC-015-D4SC03594A-s001.pdf [file SC-015-D4SC03594A-s001.pdf]

Supplementary Information

## **Discovery of megapolipeptins by genome mining of a Burkholderiales bacteria collection**

Bruno S. Paulo<sup>a,b\*</sup>, Michael J. J. Recchia<sup>c\*</sup>, Sanghoon Lee<sup>c</sup>, Claire Fergusson<sup>c</sup>, Sean B. Romanowski<sup>a,b</sup>, Antonio Hernandez<sup>a</sup>, Nyssa Krull<sup>a</sup>, Dennis Liu<sup>c</sup>, Hannah Cavanagh<sup>c</sup>, Allyson Bos<sup>d</sup>, Christopher Gray<sup>d</sup>, Brian T. Murphy<sup>a,b</sup>, Roger G. Linington<sup>c</sup>, Alessandra S. Eustaquio<sup>a,b</sup>

<sup>a</sup>Department of Pharmaceutical Sciences, College of Pharmacy, University of Illinois at Chicago, Chicago, IL, 60607, USA

<sup>b</sup>Center for Biomolecular Sciences, College of Pharmacy, University of Illinois at Chicago, Chicago, IL, 60607, USA

<sup>c</sup>Department of Chemistry, Simon Fraser University, Burnaby, BC V5H 1S6, Canada

<sup>d</sup>Department of Biological Sciences, University of New Brunswick, Saint John, NB, E2L 4L5, Canada

To whom correspondence should be addressed: [rliningt@sfu.ca](mailto:rliningt@sfu.ca); [ase@uic.edu](mailto:ase@uic.edu)

## Table of Contents

|                                                                                                                                                  |           |
|--------------------------------------------------------------------------------------------------------------------------------------------------|-----------|
| <b>METHODS</b> .....                                                                                                                             | <b>6</b>  |
| CHEMICALS AND GENERAL EXPERIMENTAL PROCEDURES. ....                                                                                              | 6         |
| DNA PREPARATION FOR ILLUMINA SEQUENCING AND NANOPORE SEQUENCING. ....                                                                            | 6         |
| POLYMERASE CHAIN REACTION. ....                                                                                                                  | 6         |
| SAMPLE PREPARATION FOR IDBAC ANALYSIS. ....                                                                                                      | 7         |
| IDBAC MALDI-TOF MS DATA ACQUISITION. ....                                                                                                        | 7         |
| CLONING OF THE <i>MGP</i> BGC TO YIELD PBS001 AND GENERATION OF THE EMPTY VECTOR CONTROL<br>PBS003. ....                                         | 8         |
| CONJUGATION PROCEDURE TO TRANSFER PBS001 AND PBS003 INTO <i>BURKHOLDERIA</i> SP. FERM BP-3421.<br>.....                                          | 8         |
| COMPARATIVE METABOLITE ANALYSIS VIA LC-MS/MS. ....                                                                                               | 9         |
| MOLECULAR NETWORK ANALYSES. ....                                                                                                                 | 9         |
| GENERAL EQUIPMENT. ....                                                                                                                          | 10        |
| PRODUCTION OF MEGAPOLYPEPTINS. ....                                                                                                              | 10        |
| ISOLATION OF MEGAPOLYPEPTINS A (1) AND B (2). ....                                                                                               | 11        |
| STRUCTURE ELUCIDATION DETAILS FOR MEGAPOLYPEPTIN A (1). ....                                                                                     | 11        |
| STRUCTURE ELUCIDATION DETAILS FOR MEGAPOLYPEPTIN B (2). ....                                                                                     | 12        |
| DETERMINATION OF THE ABSOLUTE CONFIGURATION OF THE AMINO ACIDS. ....                                                                             | 13        |
| PARTIAL HYDROLYSIS OF MEGAPOLYPEPTIN B. ....                                                                                                     | 13        |
| MEGAPOLYPEPTIN A (1). ....                                                                                                                       | 14        |
| MEGAPOLYPEPTIN B (2). ....                                                                                                                       | 14        |
| ANTIMICROBIAL SCREENING. ....                                                                                                                    | 14        |
| ANTIFUNGAL SCREENING. ....                                                                                                                       | 15        |
| <b>TABLES</b> .....                                                                                                                              | <b>17</b> |
| TABLE S1. WHOLE-GENOME SHOTGUN PROJECT DATA DEPOSITED ON NCBI GENBANK DATABASE UNDER<br>ACCESSION CODES LISTED ALONG WITH ASSEMBLY METRICS. .... | 17        |
| TABLE S2. SEQUENCING TECHNOLOGY AND ASSEMBLY DETAILS FOR THE 115 <i>BURKHOLDERIALES</i><br>STRAINS. ....                                         | 24        |

|                                                                                                                                                           |           |
|-----------------------------------------------------------------------------------------------------------------------------------------------------------|-----------|
| TABLE S3. COLLECTION DATE, ENVIRONMENTAL CONTEXT, AND GEOGRAPHIC SAMPLE LOCATION FOR THE SEQUENCED STRAINS.....                                           | 28        |
| TABLE S4. CONTIG SUMMARY FOR HYBRID ASSEMBLIES (ILLUMINA AND NANOPORE).....                                                                               | 34        |
| TABLE S5. NUMBER OF BGCs, GENOME SIZE, AND RATIO OF NUMBER OF BGCs TO GENOME SIZE PER STRAIN AND PHYLOGENETIC CLADE. ....                                 | 35        |
| TABLE S6. CLUSTER OF ORTHOLOGOUS GENES FAMILIES USED TO GENERATE PHYLOGENOMIC TREE. ..                                                                    | 37        |
| TABLE S7. BLASTp RESULTS (AS OF APR. 2023) OF ENCODED PROTEINS IN REGION 2.11 THAT CONTAINS THE <i>MGP</i> BGC.....                                       | 39        |
| TABLE S8. <sup>1</sup> H (600 MHz) AND <sup>13</sup> C NMR (150 MHz) DATA FOR MEGAPOLYPEPTIN A (1) IN DMSO- <i>D</i> <sub>6</sub> <sup>d</sup> .<br>..... | 40        |
| TABLE S9. <sup>1</sup> H (600 MHz) AND <sup>13</sup> C NMR (150 MHz) DATA FOR MEGAPOLYPEPTIN B (2) IN DMSO- <i>D</i> <sub>6</sub> <sup>d</sup> . ..       | 42        |
| TABLE S10. BACTERIAL TARGET PANEL STRAINS AND CULTURE CONDITIONS. ....                                                                                    | 44        |
| TABLE S11. ANTIMICROBIAL ACTIVITIES OF MEGAPOLYPEPTINS A (1) AND B (2).....                                                                               | 44        |
| TABLE S12. FUNGAL TARGET PANEL STRAINS AND CULTURE CONDITIONS. ....                                                                                       | 45        |
| TABLE S13. ADENYLATION DOMAIN SIGNATURE ON MEGAPOLYPEPTIN BGC.....                                                                                        | 45        |
| TABLE S14. NATURAL PRODUCT FAMILIES WITH STRUCTURAL SIMILARITY TO MEGAPOLYPEPTINS. ....                                                                   | 46        |
| TABLE S15. DETAILED MALDI-TOF MS PARAMETERS FOR IDBAC ANALYSIS. ....                                                                                      | 47        |
| <b>FIGURES.....</b>                                                                                                                                       | <b>48</b> |
| FIGURE S1. EXAMPLE OF IDBAC STRAIN PRIORITIZATION. ....                                                                                                   | 48        |
| FIGURE S2. BIOSYNTHETIC GENE CLUSTER NUMBERS AND BIOSYNTHETIC CLASS BY STRAIN. ....                                                                       | 49        |
| FIGURE S3. PIE CHARTS SHOWING SUBDIVISIONS OF ‘OTHER’ BIOSYNTHETIC GENE CLUSTERS. ....                                                                    | 50        |
| FIGURE S4. PHYLOGENOMIC TREE OF BURKHOLDERIALES LIBRARY.....                                                                                              | 51        |
| FIGURE S5. PHYLOGENOMIC TREE OF BURKHOLDERIALES LIBRARY.....                                                                                              | 52        |
| FIGURE S6. BIG-SCAPE BIOSYNTHETIC GENE CLUSTER SEQUENCE SIMILARITY NETWORK WITHIN THE 115 BURKHOLDERIALES GENOMES. ....                                   | 53        |
| FIGURE S7. NRPS NETWORKS AND SINGLETONS. ....                                                                                                             | 54        |
| FIGURE S8. RiPP NETWORKS AND SINGLETONS. ....                                                                                                             | 55        |
| FIGURE S9. PKS NETWORKS AND SINGLETONS. (A) TYPE I PKS, (B) TYPE III.....                                                                                 | 56        |
| FIGURE S10. HYBRID PKS-NRPS NETWORKS AND SINGLETONS. ....                                                                                                 | 57        |
| FIGURE S11. pBS001 SCREENING IN <i>BURKHOLDERIA</i> SP. FERM BP-3421. ....                                                                                | 58        |
| FIGURE S12. MOLECULAR NETWORK FOR <i>BURKHOLDERIA</i> SP. FERM BP-3421/pBS001. ....                                                                       | 59        |

|                                                                                                                                                         |    |
|---------------------------------------------------------------------------------------------------------------------------------------------------------|----|
| FIGURE S13. MS ANALYSIS OF NETWORK #1. ....                                                                                                             | 60 |
| FIGURE S14. MS ANALYSIS OF NETWORK #2 (MEGAPOLYPEPTINS NETWORK). ....                                                                                   | 61 |
| FIGURE S15. MS ANALYSIS OF NETWORK #3. ....                                                                                                             | 62 |
| FIGURE S16. MS ANALYSIS OF NETWORK #4. ....                                                                                                             | 63 |
| FIGURE S17. HR-ESI-MS DATA FOR MEGAPOLYPEPTIN A (1). ....                                                                                               | 64 |
| FIGURE S18. MS/MS DATA FOR MEGAPOLYPEPTIN A (1). ....                                                                                                   | 64 |
| FIGURE S19. <sup>1</sup> H NMR SPECTRUM OF MEGAPOLYPEPTIN A (1) ACQUIRED IN DMSO- <i>D</i> <sub>6</sub> AT 600 MHZ. ....                                | 65 |
| FIGURE S20. <sup>13</sup> C NMR SPECTRUM OF MEGAPOLYPEPTIN A (1) ACQUIRED IN DMSO- <i>D</i> <sub>6</sub> AT 150 MHZ. ....                               | 66 |
| FIGURE S21. HSQC SPECTRUM OF MEGAPOLYPEPTIN A (1) ACQUIRED IN DMSO- <i>D</i> <sub>6</sub> AT 600 MHZ. ....                                              | 67 |
| FIGURE S22. <sup>1</sup> H- <sup>1</sup> H COSY SPECTRUM OF MEGAPOLYPEPTIN A (1) ACQUIRED IN DMSO- <i>D</i> <sub>6</sub> AT 600 MHZ.<br>.....           | 68 |
| FIGURE S23. HMBC SPECTRUM OF MEGAPOLYPEPTIN A (1) ACQUIRED IN DMSO- <i>D</i> <sub>6</sub> AT 600 MHZ. ....                                              | 69 |
| FIGURE S24. NOESY SPECTRUM OF MEGAPOLYPEPTIN A (1) ACQUIRED IN DMSO- <i>D</i> <sub>6</sub> AT 600 MHZ. ....                                             | 70 |
| FIGURE S25. ROESY SPECTRUM OF MEGAPOLYPEPTIN A (1) ACQUIRED IN DMSO- <i>D</i> <sub>6</sub> AT 600 MHZ. ....                                             | 71 |
| FIGURE S26. KEY COSY (BOLD LINES) AND HMBC (ARROWS) CORRELATIONS FOR THE PLANAR<br>STRUCTURES OF MEGAPOLYPEPTIN A (1) AND MEGAPOLYPEPTIN B (2). ....    | 72 |
| FIGURE S27. COMPARATIVE EXTRACTED ION CHROMATOGRAMS OF MEGAPOLYPEPTIN A (1) AND METHYL<br>ESTER DERIVATIVES. ....                                       | 73 |
| FIGURE S28. COMPARATIVE MS SPECTRA OF MEGAPOLYPEPTIN A (1) AND METHYL ESTER DERIVATIVES.<br>.....                                                       | 73 |
| FIGURE S29. PLANAR STRUCTURES OF THE MEGAPOLYPEPTIN A (1) METHYL ESTER DERIVATIVES (3 AND<br>4). ....                                                   | 74 |
| FIGURE S30. KEY COSY AND HMBC CORRELATIONS OF THE METHYLATED PLANAR STRUCTURES OF<br>MEGAPOLYPEPTIN A (1) METHYL ESTER (3) AND B METHYL ESTER (4). .... | 74 |
| FIGURE S31. HR-ESI-MS DATA FOR MEGAPOLYPEPTIN B (2). ....                                                                                               | 75 |
| FIGURE S32. MS/MS DATA FOR MEGAPOLYPEPTIN B (2). ....                                                                                                   | 75 |
| FIGURE S33. <sup>1</sup> H NMR SPECTRUM OF MEGAPOLYPEPTIN B (2) ACQUIRED IN DMSO- <i>D</i> <sub>6</sub> AT 600 MHZ. ....                                | 76 |
| FIGURE S34. <sup>13</sup> C NMR SPECTRUM OF MEGAPOLYPEPTIN B (2) ACQUIRED IN DMSO- <i>D</i> <sub>6</sub> AT 150 MHZ. ....                               | 77 |
| FIGURE S35. HSQC SPECTRUM OF MEGAPOLYPEPTIN B (2) ACQUIRED IN DMSO- <i>D</i> <sub>6</sub> AT 600 MHZ. ....                                              | 78 |
| FIGURE S36. <sup>1</sup> H- <sup>1</sup> H COSY SPECTRUM OF MEGAPOLYPEPTIN B (2) ACQUIRED IN DMSO- <i>D</i> <sub>6</sub> AT 600 MHZ.<br>.....           | 79 |



|                                                                                                              |           |
|--------------------------------------------------------------------------------------------------------------|-----------|
| FIGURE S37. HMBC SPECTRUM OF MEGAPOLYPEPTIN B (2) ACQUIRED IN DMSO- <i>D</i> <sub>6</sub> AT 600 MHZ. ....   | 80        |
| FIGURE S38. NOESY SPECTRUM OF MEGAPOLYPEPTIN B (2) ACQUIRED IN DMSO- <i>D</i> <sub>6</sub> AT 600 MHZ.....   | 81        |
| FIGURE S39. EXTRACTED ION CHROMATOGRAMS OF MEGAPOLYPEPTIN B (2) AND METHYL ESTER DERIVATIVES. ....           | 82        |
| FIGURE S40. COMPARATIVE MS SPECTRA OF MEGAPOLYPEPTIN B (2) AND METHYL ESTER DERIVATIVES. ....                | 82        |
| FIGURE S41. MARFEY’S ANALYSIS OF MEGAPOLYPEPTIN A (1) AND MEGAPOLYPEPTIN B (2). ....                         | 83        |
| FIGURE S42. PARTIAL HYDROLYSIS OF MEGAPOLYPEPTIN B (2). ....                                                 | 84        |
| FIGURE S43. MULTIPLE SEQUENCE ALIGNMENT OF KR DOMAINS FROM THE MEGAPOLYPEPTIN BGC. ...                       | 85        |
| FIGURE S44. MULTIPLE SEQUENCE ALIGNMENT OF A DOMAINS FROM THE MEGAPOLYPEPTIN BGC.....                        | 85        |
| FIGURE S45. MULTIPLE SEQUENCE ALIGNMENT OF C DOMAINS FROM THE MEGAPOLYPEPTIN BGC. ....                       | 86        |
| FIGURE S46. NEIGHBOR-JOINING PHYLOGENETIC TREE OF 189 NRPS C DOMAINS.....                                    | 87        |
| FIGURE S47. MULTIPLE SEQUENCE ALIGNMENT OF DH DOMAINS FROM THE MEGAPOLYPEPTIN BGC AND LAGRIAMIDE B BGC. .... | 89        |
| FIGURE S48. MULTIPLE SEQUENCE ALIGNMENT OF KS DOMAINS FROM THE MEGAPOLYPEPTIN BGC. ...                       | 90        |
| <b>REFERENCES.....</b>                                                                                       | <b>91</b> |

## **METHODS**

### **Chemicals and general experimental procedures.**

Chemicals were purchased from Fischer Scientific and Sigma Aldrich, restriction endonucleases, ligases and Hi-Fi DNA assembler were purchased from New England Biolabs (NEB). Plasmid DNA was isolated using ZR plasmid Miniprep - Classic (Zymo Research, catalog No. D4016) following the manufacturer's protocol. Polymerase chain reaction (PCR) for plasmid construction was carried out using Q5 High fidelity polymerase from NEB, whereas DreamTaq PCR Master mix (2×) (Thermo Scientific, K1072) was used for mutant identification purposes. Oligonucleotides were purchased from Sigma Aldrich. See Supplementary Methods for further PCR details. Vector and primer design was performed using Geneious Prime 2023.1.1. Genomic DNA was isolated using GenElute (Sigma Aldrich, SLCH6584) following the manufacturer's protocol.

### **DNA preparation for Illumina sequencing and Nanopore sequencing.**

A 20 µL cryopreserved sample of each Burkholderiales strain was transferred into 5 ml of either LB (most strains) or BYP liquid media (10.0 g.L<sup>-1</sup> starch, 4.0 g.L<sup>-1</sup> yeast extract, 2.0 g.L<sup>-1</sup> peptone, 3.0 g.L<sup>-1</sup>, used for *P. megapolitana* and *P. acidicola* strains) and incubated in an orbital shaker at 220 rpm and 30°C for 24-48 h. DNA isolation was performed by using the GenElute Bacterial Genomic DNA Kits (Sigma Aldrich) according to the manufacturer's instruction. Prior to sample submission, the integrity of DNA was analyzed by agarose gel electrophoresis and concentration and purity determined using a Nanodrop.

### **Polymerase Chain Reaction.**

For amplification of pBS003 the PCR was performed in 50 µL consisted of 50 ng of pBS001 as template, 200 mM of dNTPs, 0.5 mM Forward/Reverse primer solution, 10 µL of 5× Q5 High GC Enhancer Buffer, and 0.02 U/mL of Q5 High Fidelity DNA Polymerase. The thermal cycling conditions were according to the NEB Q5 (High Fidelity) manufacturer's protocol which involves: 1 cycle of initial denaturation (98°C, 30 s), 30 cycles of denaturation (98°C, 10 s) annealing (60°C, 30 s), extension (72°C, 30 s/kbp), and 1 cycle of final extension (72°C, 2 min). For pBS001 screening purposes, the PCR was performed using DreamTaq master mix (2×; Thermo Scientific) in 25 µL volume containing 50 ng of template, 0.5 mM Forward/Reverse primer solution, DMSO (3%), and 0.02 U/mL of DreamTaq DNA Polymerase (Thermo Scientific). The thermal cycling conditions were according to Thermo Scientific manufacturer's protocol,

which involves: 1 cycle of initial denaturation (95°C, 60 s), 30 cycles of denaturation (98°C, 10 s) annealing (60°C, 30 s), extension (72°C, 60 s/kbp), and 1 cycle of final extension (72°C, 10 min).

### **Sample preparation for IDBac analysis.**

*Burkholderiales* bacteria were cultivated on agar medium (LB for most or BYP for slower growing *P. megapolitana* and *P. acidicola* strains) for approximately 3 days at 30°C. Three biological replicates (different colonies) of each bacterium were smeared onto a MALDI 384-well ground steel plate using a sterile wooden toothpick. After the bacterial colonies were smeared onto the target plate, 1 µL of 70% (7:3 Optima, Fisher Chemical: Optima LC-MS Grade Water Fisher Chemical) formic acid was pipetted onto each target with a bacterial smear. After the formic acid dried, 1 µL of 10 mg/mL  $\alpha$ -cyano-4-hydroxycinnamic acid matrix was applied to each target with bacterial smears and dried. The matrix was prepared using  $\alpha$ -cyano-4-hydroxycinnamic acid (powder, 98% pure, Sigma-Aldrich, part-C2020), 50% acetonitrile, 47.5% water, and 2.5% trifluoroacetic acid. All solvents used were LC-MS grade.

### **IDBac MALDI-TOF MS data acquisition.**

MALDI-TOF MS data acquisition was performed using an Autoflex Speed LRF mass spectrometer (Bruker Daltonics) equipped with a smartbeam<sup>TM</sup>-II laser (355 nm). Automated data acquisition was accomplished using flexControl software version 3.4.135.0 (Bruker Daltonics) and flexAnalysis software version 3.4. Spectra were collected over three dates (2020-12-08, 2020-12-09, 2021-01-08, year-month-day). Protein spectra were recorded in positive linear mode (1000 shots; RepRate: 2000 Hz; delay: 29918 ns; ion source 1 voltage: 19.5 kV; ion source 2 voltage: 18.25 kV; lens voltage: 7 kV; mass range: 1.9 kDa to 2.1 kDa; matrix suppression cutoff: 1.9 kDa). Protein spectra were corrected with external Bruker Daltonics bacterial test standard (BTS). Specialized metabolite spectra were recorded in positive reflectron mode (1000 shots; RepRate: 2000 Hz; delay: 9316 ns; ion source 1 voltage: 19 kV; ion source 2 voltage: 16.8 kV; reflectron voltage 1: 21 kV; reflectron voltage 2: 9.7 kV; lens voltage: 8.5 kV; mass range: 0.05 kDa to 2.7 kDa; matrix suppression cutoff: 50 Da). Specialized metabolite spectra were corrected with external Bruker Daltonics peptide calibration standard and  $\alpha$ -CHCA [2M+H]<sup>+</sup> (379.0930 Da). Automated data acquisitions were performed using flexControl software version 3.4.135.0 (Bruker Daltonics) and flexAnalysis software version 3.4. Spectra were automatically evaluated during acquisition to determine whether a spectrum was of high enough quality to retain and add to the sum of the sample acquisition.

### **Cloning of the *mgp* BGC to yield pBS001 and generation of the empty vector control pBS003.**

Cloning of the *mgp* BGC from *Paraburkholderia megapolitana* RL18-039-BIC-B (genome #76) was performed by Terra Bioforge (Wisconsin, USA). First, pSK021b containing *attP* and *int* from  $\phi$ CTX1<sup>1</sup>, and a pUC replicon was modified into a BAC vector. The high-copy pUC replicon was replaced with a 5.2-kbp *oriV-ori2-repE-incC-sopA-sopB-sopC* cassette to convert the plasmid into a low-copy BAC vector named pSK021b-BAC. The entire *mgp* BGC (located on chromosome #2, coordinates 2,357,111-2,410,193) was selectively excised from the genomic DNA using a CRISPR-Cas9 strategy<sup>2</sup>, followed by isothermal DNA assembly with the linearized vector prepared by PCR<sup>3,4</sup>. DNA assembly of Cas9-restricted genomic preparations was performed to linearized pSK021b-BAC vector containing overlap regions specific to the target *mgp* fragment. The DNA assembly reaction was transformed into *E. coli* BacOpt2.0 from which colonies were recovered. Transformants were assayed by colony PCR to generate amplicons for both the left and right cloning junctions. Plasmid DNA was restriction digested separately by EcoRI and BamHI and compared to a simulated digest, confirming a match (**SI Figure S11**). The junction PCRs for these clones were purified and Sanger sequenced to confirm the DNA assembly as designed. The BAC vector containing the *mgp* BGC was named pBS001.

To be used as a negative control, pBS003 was generated by amplifying the backbone of pBS001 using primer pair T7\_pBS003\_Fwd (5' GAATTCAAGCTTCTCGAGCCTATAGTGAGTCGTATTAC 3' – homology arm underlined) and pBAD\_pBS003\_Rev (5' CTCGAGAAGCTTGAATTCATGGAGAAACAGTAGAGAGT 3' – homology arm underlined) and ligating the PCR product using isothermal assembly methodology, at 50°C for 1 h.

### **Conjugation procedure to transfer pBS001 and pBS003 into *Burkholderia* sp. FERM BP-3421.**

FERM BP-3421 and *E. coli* S17-1/pACYC184\_MBurI\_MBurII containing either pBS001 or pBS003 were cultivated in 10 mL of LB medium at 30°C, 200 rpm, in an orbital shaker, for ~18 h. The *E. coli* culture was supplemented with kanamycin at 50  $\mu\text{g}\cdot\text{mL}^{-1}$  and tetracycline at 10  $\mu\text{g}\cdot\text{mL}^{-1}$ . The overnight cultures were subcultured in 10 mL fresh LB (200  $\mu\text{L}$  of the *E. coli* S17-1 and 400  $\mu\text{L}$  of FERM BP-3421 were used, respectively). Kanamycin and tetracycline as above were used for the *E. coli* cultures. *E. coli* and FERM BP-3421 were cultured at 30°C, 200 rpm, until an OD<sub>600</sub> range of 0.4 – 0.6. Cells were harvested at 4000  $\times$ g for 5 min at room temperature, and gently washed twice with fresh LB (10 mL) each time followed by centrifugation as above. After the second wash, each cell pellet was resuspended in 1 mL fresh LB. For each given plasmid, 0.5 mL of *E. coli* S17-1/pACYC184\_MBurI\_MBurII were

combined with 0.5 mL of FERM BP-3421 and plated onto LB agar plates with no kanamycin. Negative control plates were generated by plating only *E. coli* S17-1/pACYC184\_MBurI\_MBurII (0.25 mL) or only FERM BP-3421 (0.25 mL) in separated LB agar plates. All plates were incubated at 30 °C overnight (~18 h). Cells were collected from the conjugation (and negative control) plates using a loop and streaked for single colonies onto fresh LB agar plates supplemented with kanamycin (500 µg.mL<sup>-1</sup> for plasmid selection) and gentamycin (10 µg.mL<sup>-1</sup> to prevent *E. coli* grow). Plates were incubated at 30°C for 2 – 3 days until exconjugants were observed. Obtained single colonies were re-streaked onto fresh selection plates. Purified clones were verified via PCR using oligonucleotides pBS001\_scpT7\_Fwd (5' ATCGAACATGCGTACGAGCC 3') and pBS001\_scpT7\_Rev (5' GGCCGATTCATTAATGCAGC 3') yielding an amplicon of 460 bp. pBS001 plasmid was used as positive control, and FERM BP-3421 gDNA was used as negative control (SI Figure S11).

### **Comparative metabolite analysis via LC-MS/MS.**

For LC-MS/MS of *Burkholderia* sp. containing either pBS001 or pBS003, crude extract samples at 1 mg.mL<sup>-1</sup> were filtered using 4 mm PTFE syringe filters with 0.20 µm pore size (Thermo Scientific). The analyses were made using Ultra Performance Liquid Chromatography (Bruker Daltonics Corporation, Germany) coupled to mass spectrometry (COMPACT ESIQTOF). The chromatography analyses were temperature controlled at 40°C using an InfinityLab Poroshell 120 C-18 column with 2.1 × 50 mm (Agilent, USA), 1.9 mm particle size joined to a guard column InfinityLab Poroshell 120 C18 with 2.1 × 5 mm (Agilent, USA), 1.9 mm particle size, and a flow rate of 0.500 mL.min<sup>-1</sup>. The mobile phase was composed of water + 0.1% formic acid (A) and acetonitrile + 0.1% formic acid (B) purchased from Thermo Scientific (Optima LC-MS). Analyses were performed using a quadrupole time-of-flight (QToF) using sodium formate (5mM) as internal calibrant. The collision energy applied was ramp-dependent ranging from 10 to 45 eV with end plate offset potential – 500V. The mass window (*m/z*) scanned was between 100 and 1800 with an acquisition rate of 5 Hz for MS and 7 Hz for MS/MS in positive mode [M+H]<sup>+</sup>. The five most intense ions were automated fragmented (auto MS/MS) in a data dependent acquisition mode (DDA). Spectra were processed using DataAnalysis 5.4 software.

### **Molecular Network analyses.**

The MS data was exported to mzXML using DataAnalysis 4.2 software. Molecular networks for crude extracts were created using the mzXML files following the online workflow available at the Global

Natural Products Social Molecular Network (GNPS) platform (<http://gnps.ucsd.edu>)<sup>5</sup>. Consensus spectra with less than two spectra accumulation were not considered in this analysis. Molecular Network parameters were used as follow, ‘Precursor ion mass tolerance (PIMT) = 0.02’; ‘Fragment ion Mass Tolerance (FIMT) = 0.02’ and other settings we kept as default, which includes ‘Min Pairs Cos = 0.7’; ‘Minimum matched fragment ions = 6’; ‘Node TopK = 10’; ‘Minimum Cluster Size = 2’. ‘Library Search Min Matched Peaks = 6’; ‘Score Threshold = 0.7’. The resulting data were subtracted from a blank analysis and then processed as a network of edges and nodes on cytoscape Version (3.9.1)<sup>6</sup>.

### **General Equipment.**

Optical rotations were measured on a Model 341 (Perkin Elmer) polarimeter. Ultraviolet absorption spectra were recorded on a Shimadzu UV-3600 Plus UV–VIS spectrophotometer. HR-ESI-MS and MS/MS experiments were recorded on a Select Series MRT (Waters), a SYNAPT G2-Si UPLC-ESI-qTOF (Waters), and a COMPACT ESI qTOF (Bruker). NMR spectra were measured on an AVANCE III-HD 600 MHz spectrometer equipped with a 5 mm QCI cryoprobe and referenced to residual solvent proton and carbon signals  $\delta_{\text{H}}$  2.50 and  $\delta_{\text{C}}$  39.5 for DMSO-*d*<sub>6</sub>. MPLC (CombiFlash, Teledyne ISCO) was performed on a RediSep Rf solid load cartridge (5g, Teledyne ISCO). HPLC separations were performed on an Agilent 1200 series HPLC equipped with a binary pump and a diode array detector using a Synergi-RP FUSION (250 × 10 mm, 10  $\mu\text{m}$ ) and Kinetex XB-C18 (250 × 4.6 mm, 5  $\mu\text{m}$ ) Phenomenex columns. Solvents used for HPLC chromatography were Optima grade and were used without further purification.

### **Production of megapolipeptins.**

For megapolipeptin A (**1**) and B (**2**) production, *Burkholderia* sp. FERM BP-3421  $\Delta fr9A/pBS001$  was cultured in 6 × Erlenmeyer flasks each containing 50 mL of seed medium at 25°C, 200 rpm for one day. 13 × 2.8 L Fernbach flasks each containing 1 L 2S4G production media and L-arabinose at 100 mM were inoculated with 20 ml of a seed culture and cultured at 25°C, 220 rpm for 5 days. The culture broth was collected by centrifugation at 8000 × *g* for 10 min. XAD-16N resin (Amberlite – Sigma) was added (10% w/v) to the supernatant and shaken at 200 rpm overnight (~16 h). The resin was collected by filtration and washed twice with MeOH 1:10 (weight of resin per volume of methanol) using an orbital shaker for 4h at 200 rpm. The resin was then removed by filtration and the MeOH phase was dried under reduced pressure to yield 45.25 g of crude extract. Half of the extract, corresponding to 6.5 L, was used for the isolation of megapolipeptins as described below.

### Isolation of megapolipeptins A (1) and B (2).

The dried extract (FERM-BP-XAD-3421-fr9A::pBS001) was suspended in MeOH, and Celite (15 g/L) was added. The dried Celite was then loaded into a cartridge before separation on a C<sub>18</sub> (5 g) column using a CombiFlash system using a stepwise elution gradient of MeOH/H<sub>2</sub>O (10% aq. MeOH (discarded), 20% aq. MeOH, 40% aq. MeOH, 60% aq. MeOH, 80% aq. MeOH, 100% MeOH, and 100% EtOAc) to afford six fractionated samples (FERM-BP-XAD-A → F).

MS analysis of the fractionated samples showed the presence of both megapolipeptin A (1) and B (2) in FERM-BP-XAD-C (60% aq. MeOH). The fraction was subjected to reversed-phase HPLC (Phenomenex Synergy FUSION RP-80A, 250 × 10 mm, 10 μm, 4 mL.min<sup>-1</sup>) using a gradient solvent condition of 10% aq. ACN to 80% aq. ACN with 0.02% formic acid over 30 min. Two fractions were collected: FERM-BP-XAD-C-1 (*m/z* 958, 19.3 min) and FERM-BP-XAD-C-2 (*m/z* 984, 20.5 min). FERM-BP-XAD-C-1 was purified on an RP-HPLC column (Phenomenex Kinetex XB-C<sub>18</sub>, 250 × 4.6 mm, 5 μm, 1.2 mL.min<sup>-1</sup>) using a gradient of 10% aq. ACN to 40% aq. ACN with 0.02% formic acid over 10 minutes to afford **1** (3.7 mg, *t<sub>R</sub>* 5.20 min). FERM-BP-XAD-C-2 containing **2** was purified by isocratic elution using a Phenomenex Kinetex XB-C<sub>18</sub> analytical column (250 × 4.6 mm, 5 μm, 1.2 mL.min<sup>-1</sup>) to yield **2** (9.8 mg; *t<sub>R</sub>* 9.46 min).

### Structure elucidation details for megapolipeptin A (1).

Megapolipeptin A (1) was isolated as an amorphous, white solid. The molecular formula of C<sub>45</sub>H<sub>75</sub>N<sub>5</sub>O<sub>17</sub> was deduced from HRMS measurements of the protonated cluster ion at [M+H]<sup>+</sup> *m/z* 958.52350 (calc'd *m/z* 958.52307, 0.449 ppm, **Figure S13**). MS/MS data is presented in **Figure S14**. The planar structure of **1** was obtained using data from a comprehensive set of 1D (<sup>1</sup>H and <sup>13</sup>C) and 2D NMR (COSY, TOCSY, ROESY, phase sensitive HSQC, HMBC) experiments recorded in DMSO-*d*<sub>6</sub> (**Figures S15 – 21**). The 1D NMR spectra suggested the presence of six amide protons ( $\delta_{\text{H}}$  8.49, 7.93, 7.86, 7.58, 7.19, 6.76), seven carboxylic carbons ( $\delta_{\text{C}}$  174.0, 173.6, 173.4, 170.5, 169.9, 169.8, 159.8), two ketone carbons ( $\delta_{\text{C}}$  206.2, 202.4), and two  $\alpha$ -protons ( $\delta_{\text{H}}$  4.32, 4.21) indicating the inclusion of two amino acid residues (**Table S8**). The 2D NMR spectra indicated the molecule was comprised of six isolated spin systems.

Observed gHMBC correlations from two NH protons ( $\delta_{\text{H}}$  7.19, 6.76) to a carbonyl carbon at  $\delta_{\text{C}}$  173.6 and a methylene carbon ( $\delta_{\text{C}}$  39.9) indicated the presence of a terminal amide group. Analysis of gCOSY and gHMBC spectra suggested a terminal 4-amino-3,5-dihydroxypentanamide (Ahp<sub>a</sub>) moiety as the first

complete spin system. Two additional spin systems were established based on gCOSY and gHMBC correlations revealing threonine amino acid residues (<sup>1</sup>Thr and <sup>2</sup>Thr). The <sup>1</sup>H-NMR spectra showed the presence of four vinylic protons ( $\delta_{\text{H}}$  5.36 – 5.35) with gCOSY correlations to four allylic methylenes ( $\delta_{\text{H}}$  1.99 – 1.90). Continued gCOSY and gHMBC correlations revealed a 3-amido-5,19-dihydroxyicosan-10,14-dienamide (Adhda) moiety as the fourth completed spin system. From a ketone carbon at  $\delta_{\text{C}}$  206.2, gHMBC and gCOSY correlations were used to assign a fifth spin system as a 2-hydroxy-4-oxoheptanedioic acid (Hoha) functionality. The sixth spin system was completed based on gHMBC and gCOSY correlations from an additional downfield ketone carbon at  $\delta_{\text{C}}$  202.4 to give a 2-methyl-propan-1-one (Mpo) moiety. The arrangement of the various spin systems was assigned on the basis of gHMBC correlations between the amide carbon of <sup>1</sup>Thr-1 and A $\alpha$ pa-NH, <sup>1</sup>Thr-NH and <sup>2</sup>Thr-1, <sup>2</sup>Thr-NH and Adhda-1, Adhda-19 and Hoha-2 (**Figure S22**). The complete planar structure could not be determined due to unobserved gHMBC correlations from Mpo-1 to the main structure.

For unambiguous assignment of carboxylic acids in **1**, the molecule was treated with trimethylsilyl (TMS) diazomethane. Surprisingly, MS analysis of the methylated product showed two peaks, each with an increase in mass of 42 Da ( $[\text{M}+\text{H}]^+$   $m/z$  1000.5632 (calc'd  $m/z$  1000.5670) C<sub>48</sub>H<sub>82</sub>N<sub>5</sub>O<sub>17</sub>) suggesting the methylation of three carboxylic acids (**Figure S23** and **S24**). Both derivatized products (**3** and **4**) were separated by HPLC and analyzed by 1D and 2D NMR experiments. The <sup>1</sup>H-NMR spectrum showed two methoxy signals, which were assigned to the acid moieties of Hoha-1 and Hoha-7. Closer inspection of the <sup>13</sup>C-NMR spectrum revealed the carbonyl carbon Mpo-1 was no longer present. Instead, gCOSY correlations showed this moiety was now a 2-isopropylloxirane (Ipo) due to a Büchner-Curtius-Schlotterbeck reaction between the carbonyl group and TMS diazomethane to generate an epoxide. The complete planar structures of **3** and **4** were determined through 1D and 2D NMR experiments and compared with **1** (**Figure S25** and **S26**). gHMBC correlations from Ipo-2 ( $\delta_{\text{H}}$  2.27) and Ipo-5 ( $\delta_{\text{H}}$  2.87, 2.60) to Adhda-21 ( $\delta_{\text{C}}$  168.4) in both derivatized products established the connection of the Ipo moiety with the rest of the molecule (**Figure S26**). From these data it was determined that the Mpo moiety was attached to Adhda-21, completing the planar structure of **1**. Sequential losses of A $\alpha$ pa [ $m/z$  149.09352], <sup>1</sup>Thr [ $m/z$  250.13945] and <sup>2</sup>Thr [ $m/z$  351.19006] in the MS/MS fragmentation data corroborated the positional assignments of these moieties (**Figure S27**).

### Structure elucidation details for megapolipeptin B (**2**).

Megapolipeptin B (**2**) was also isolated as an amorphous, white solid. The mass spectrum of **2** displayed a molecular ion  $[\text{M}+\text{H}]^+$   $m/z$  984.53821 (calc'd  $m/z$  984.53872, -0.518 ppm) corresponding to a molecular



formula of  $C_{47}H_{77}N_5O_{17}$  by HRMS (**Figure S27**). The mass difference of 26 mass units compared to **1** suggested that **2** contained two additional vinylic methines along the hydrocarbon chain. The NMR data of **2** were comparable to **1** showing six isolated spin systems (**Figures S29 – S34**). Downfield analysis of the  $^1H$ -NMR spectrum containing the vinylic signals ( $\delta_H$  5.37) integrated for six protons which agreed with the addition of 26 mass units. Comprehensive analysis of the 1D and 2D NMR spectra, when compared with **1**, revealed Ahpa,  $^1Thr$ ,  $^2Thr$ , Hoha, and Mpo moieties. A set of gCOSY and gHMBC experiments established the final spin system of the hydrocarbon chain as 3-amino-5,21-dihydroxydocosa-8,12,16-trienamide (Adhta) (**Table S9, Figure S22**).

The assignment of the Mpa moiety was determined in similar fashion to compound **1**. Compound **2** was treated with TMS diazomethane to generate the epoxide derivative ( $[M+H]^+$  1026.5837 (calc'd 1026.5862). The complete planar structure of the derivatized product was established through gCOSY and gHMBC correlations. Finally, the positions of the Ahpa [ $m/z$  149.09352],  $^1Thr$  [ $m/z$  250.13945], and  $^2Thr$  [ $m/z$  351.19006] moieties were confirmed by MS/MS.

#### **Determination of the absolute configuration of the amino acids.**

Megapolipeptin A (**1**) and B (**2**) (300  $\mu$ L each) were hydrolyzed (100  $\mu$ L 6 N HCl at 110°C for 18 hours) in a 500  $\mu$ L sealed reaction vessel. After the reaction, the excess HCl was removed under a stream of  $N_2$  gas, and the residue was re-suspended in 100  $\mu$ L 50% aq. acetone. 100  $\mu$ L of FDVA solution (1-fluoro-2,4-dinitrophenyl-5-L-valineamide) in acetone (10 mg/mL) and 40  $\mu$ L of 1M  $NaHCO_3$  were added to the reaction vessel and heated at 40°C for 1 hour. The reaction was then quenched with 40  $\mu$ L 1 N HCl and dried under a stream of  $N_2$  gas. The dried residue was dissolved in 500  $\mu$ L MeOH and compared with standard FDVA-amino acids by RP-UHPLC-MS (Waters ACQUITY HSS T3 1.8  $\mu$ m, 0.650 mL.min $^{-1}$ ) using a gradient of 5% aq. ACN to 95% aq. ACN with 0.02% formic acid over 11 minutes. The absolute configuration of each amino acid was determined by comparing retention times of FDVA-amino acid derivatives in **1** and **2** with standard D,L FDVA-amino acids (**Figure S37**).

#### **Partial hydrolysis of megapolipeptin B.**

Megapolipeptin B (**2**, 0.5 mg) underwent partial hydrolysis to isolate a fragment containing one threonine residue. Compound **2** was hydrolyzed using 1N HCl at 110°C in a sealed 500  $\mu$ L reaction vessel. The reaction was monitored by UPLC-MS to optimize the yield of the desired product. After 30 minutes, the reaction was quenched with 1 M  $NaHCO_3$  and dried under a stream of  $N_2$  (g). The resulting hydrolysate

was purified using HPLC on an Agilent 1200 series system equipped with a Kinetex XB-C18 Phenomenex column (250 × 4.6 mm, 5 μm). An elution gradient from 5% to 95% aqueous MeCN over 40 min was employed, with a flow rate of 1.25 mL/min. The desired compound eluted at 25.1 min (0.1 mg) and was monitored by UV/Vis at 254 nm.

### **Megapolipeptin A (1).**

$[\alpha]_D^{20} +5.0$  (c 0.23, MeOH); UV (MeOH)  $\lambda_{\max}$  (log  $\epsilon$ ) = 248 (1.41) nm. See **Table S8** for NMR shifts. See **Figures S14 – S20** for NMR spectra. HR-ESI-MS  $[M+H]^+$   $m/z$  958.52350 (calcd for C<sub>45</sub>H<sub>75</sub>N<sub>5</sub>O<sub>17</sub>, 958.52307, 0.449 ppm).

### **Megapolipeptin B (2).**

$[\alpha]_D^{20} +4.0$  (c 0.52, MeOH); UV (MeOH)  $\lambda_{\max}$  (log  $\epsilon$ ) = 248 (2.04) nm. See **Table S9** for NMR shifts. See **Figures S28 – S33** for NMR spectra. HR-ESI-MS  $[M+H]^+$   $m/z$  984.53821 (calcd for C<sub>47</sub>H<sub>77</sub>N<sub>5</sub>O<sub>17</sub>, 984.53872, -0.518 ppm).

### **Antimicrobial screening.**

Antimicrobial susceptibility tests against the bacterial target panel were performed using a miniaturized high throughput assay adapted from the broth microdilution methods outlined by the Clinical and Laboratory Standards Institute (CLSI) as described in previous studies<sup>7–14</sup>. Bacterial test strains were individually grown on fresh nutrient agar (ATCC Medium 3), tryptic soy agar (ATCC Medium 18) or brain heart infusion agar (ATCC Medium 44), respectively (**Table S10**), as recommended by the American Type Culture Collection (ATCC) cultivation protocol. Individual colonies were used to inoculate 3 mL of sterile nutrient broth (NB), tryptic soy broth (TSB) or brain heart infusion broth (BHI) and grown overnight with shaking at 200 rpm, 37°C. *Listeria ivanovii* (ATCC BAA-139) was incubated overnight but not shaken (37°C; 5% CO<sub>2</sub>). Saturated overnight cultures were diluted in their respective media according to turbidity to achieve approximately 5 × 10<sup>5</sup> CFU/mL of final inoculum density and dispensed into sterile clear polystyrene 384-well microplates (Thermo Scientific™ 265202) with a final screening volume of 30 μL. *L. ivanovii* was diluted with and grown in Haemophilus test medium (HTM; ATCC Medium 2167). DMSO solutions of test compounds and antibiotic controls were prepared as 1:1 dilution series and pinned into each assay plate (200 nL) using a high throughput pinning robot (Tecan Freedom EVO 100) to achieve final screening concentrations ranging from 128 μM to 3.91 nM per

compound. In each 384-well plate; lane 1 was reserved for DMSO vehicle and culture medium; lane 2 reserved for DMSO vehicle, culture medium, and target bacteria; lanes 23 and 24 reserved for antibiotic controls, DMSO vehicle, culture medium, and target bacteria. After compound pinning, assay plates were read as  $t_0$  at OD<sub>600</sub> using an automated plate reader (BioTek Synergy Neo2), sealed with a lid, and placed in a humidity-controlled incubator at 37°C for 18-20 hours before optical density was obtained for  $t_{20}$ . *L. ivanovii* was incubated in a separate incubator (37°C; 5% CO<sub>2</sub>). Resulting growth curves for each dilution series were used to determine the MIC values for all test compounds following standard procedures.

### **Antifungal screening.**

Antifungal activity against *C. albicans* (ATCC 14053) and *S. cerevisiae* (ATCC 9763) was evaluated using a microbroth dilution antibiotic susceptibility assay modified from McCulloch *et al.* (**Table S11**).<sup>15</sup> Immediately prior to use, stock solutions of test compounds were prepared at the desired concentration in sterile-filtered dimethyl sulfoxide (DMSO, 40  $\mu$ L) and diluted with either Sabouraud dextrose broth (SDB, 960  $\mu$ L for *C. albicans*; BD Difco, Becton Dickinson, Mississauga, Ontario) or yeast mold broth (YMB; , 960  $\mu$ L for *S. cerevisiae*; BD Difco). The resulting test solutions (100  $\mu$ L; 4% DMSO) were transferred to the non-peripheral wells of a clear, non-tissue culture treated 96-well microtiter plate in triplicate (BD Falcon, Becton Dickinson, Mississauga, Ontario). Wells were then inoculated with suspensions of either *C. albicans* or *S. cerevisiae* (100  $\mu$ L;  $1 \times 10^6$  CFU/mL), to obtain a cell density of  $5 \times 10^5$  CFU/mL. Sterile water (200  $\mu$ L) was added to all perimeter wells to reduce evaporation from experimental wells. Each plate contained 3 negative control wells (4% DMSO in appropriate broth [100  $\mu$ L] inoculated with appropriate fungi [100  $\mu$ L;  $1 \times 10^6$  CFU/mL]) and 3 untreated blank wells (2% DMSO in appropriate broth [200  $\mu$ L]). Initial and final optical densities (OD) were determined for each well by recording absorbance at 600 nm immediately before and after incubation for 24 hours at 37°C using a Molecular Devices Emax microplate reader (Molecular Devices; Sunnyvale, CA, USA). Initial OD readings were subtracted from the final readings for each well to obtain the change in OD ( $\Delta$ OD).  $\Delta$ OD values were corrected for background absorbance of the culture broth by subtracting the mean  $\Delta$ OD readings of the blanks from the mean  $\Delta$ OD readings of the control and test wells. The percentage inhibition of fungal growth is defined as:  $[1 - (\text{mean test } \Delta\text{OD}/\text{mean negative control } \Delta\text{OD})] \times 100$ , with the lowest concentration that inhibited growth by more than a mean value of 90% being considered the MIC<sup>16</sup>.

Antifungal activity against *A. niger* (DSM 737) and *P. lilacinum* (DSM 846) was assessed using the same microbroth dilution procedure with MICs being assessed by direct observation of fungal growth.

Fungal strains were inoculated onto fresh potato dextrose agar (BD Difco) and incubated at 22°C for 3-5 days. Colonies were then immersed in 0.1% Tween 80 in sterile, double distilled water (5 mL) and carefully rubbed with a sterile inoculating loop. The resulting suspension was transferred by pipet to a sterile centrifuge tube, spores were counted using an Improved Neubauer haemocytometer, and the density of the suspension adjusted to  $2.5 \times 10^5$  CFU/mL with sterile 0.1% aqueous Tween 80. Samples were prepared in 96-well plates as described above using potato dextrose broth (PDB; BD Difco) prepared at twice the recommended concentration (48 g/L) and wells being inoculated with the aqueous suspensions of either *A. niger* or *P. lilacinum*. Following a 24 hour incubation at 22°C, wells were examined using a stereo microscope (320× magnification) with the lowest concentration that showed no discernable fungal growth and no difference in turbidity to the blanks in all three replicate wells being considered the MIC.

## TABLES

**Table S1. Whole-genome shotgun project data deposited on NCBI GenBank database under accession codes listed along with assembly metrics.**

| No. | Sample Name | Organism                            | Strain code    | SUBID       | BioProject  | BioSample    | Accession       | Genome size (Mbp) | Contig number | G+C content (%) |
|-----|-------------|-------------------------------------|----------------|-------------|-------------|--------------|-----------------|-------------------|---------------|-----------------|
| 1   | 1-A4        | <i>Paraburkholderia xenovorans</i>  | RL17-329-BIC-A | SUB12338458 | PRJNA930029 | SAMN32981017 | JAQQBV000000000 | 5.8               | 140           | 62.2            |
| 2   | 1-A6        | <i>Paraburkholderia nemoris</i>     | RL17-333-BIC-B | SUB12338458 | PRJNA930029 | SAMN32981018 | JAQQBW000000000 | 5.2               | 151           | 61.6            |
| 3   | 1-B2        | <i>Paraburkholderia sedimicola</i>  | RL17-328-BIB-A | SUB12338458 | PRJNA930029 | SAMN32981019 | JAQQBX000000000 | 8.3               | 156           | 62.1            |
| 4   | 1-B5        | <i>Paraburkholderia sedimicola</i>  | RL17-333-BID-A | SUB12338458 | PRJNA930029 | SAMN32981020 | JAQQBY000000000 | 7.3               | 175           | 61.9            |
| 5   | 1-B9        | <i>Paraburkholderia diworthii</i>   | RL17-335-BIF-A | SUB12338458 | PRJNA930029 | SAMN32981021 | JAQQBZ000000000 | 7.9               | 97            | 62.4            |
| 6   | 1-C2        | <i>Paraburkholderia sedimicola</i>  | RL17-337-BIC-A | SUB12338458 | PRJNA930029 | SAMN32981022 | JAQQCA000000000 | 6.7               | 200           | 61.1            |
| 7   | 1-C4        | <i>Paraburkholderia xenovorans</i>  | RL17-337-BIC-C | SUB12338458 | PRJNA930029 | SAMN32981023 | JAQQCB000000000 | 8.7               | 402           | 62.2            |
| 8   | 1-C8        | <i>Paraburkholderia sedimicola</i>  | RL17-338-BIB-A | SUB12338458 | PRJNA930029 | SAMN32981024 | JAQQCC000000000 | 7.5               | 131           | 61.4            |
| 9   | 1-C9        | <i>Paraburkholderia sedimicola</i>  | RL17-333-BIE-B | SUB12338458 | PRJNA930029 | SAMN32981025 | JAQQCD000000000 | 7.7               | 344           | 62.0            |
| 10  | 1-D2        | <i>Paraburkholderia sedimicola</i>  | RL17-336-BIC-B | SUB12338458 | PRJNA930029 | SAMN32981026 | JAQQCE000000000 | 7.8               | 180           | 61.9            |
| 11  | 1-D4        | <i>Paraburkholderia metrosideri</i> | RL17-338-BIC-A | SUB12338458 | PRJNA930029 | SAMN32981027 | JAQQCF000000000 | 7.3               | 166           | 61.5            |
| 12  | 1-D9        | <i>Paraburkholderia bryophila</i>   | RL17-338-BIF-C | SUB12338458 | PRJNA930029 | SAMN32981028 | JAQQCG000000000 | 9.3               | 81            | 63.5            |
| 13  | 1-E8        | <i>Paraburkholderia sedimicola</i>  | RL17-340-BIC-B | SUB12338458 | PRJNA930029 | SAMN32981029 | JAQQCH000000000 | 7.8               | 75            | 61.4            |
| 14  | 1-F6        | <i>Paraburkholderia strydomiana</i> | RL17-350-BID-A | SUB12338458 | PRJNA930029 | SAMN32981030 | JAQQCI000000000 | 7.5               | 85            | 62.7            |

|    |      |                                        |                |             |             |              |                 |     |     |      |
|----|------|----------------------------------------|----------------|-------------|-------------|--------------|-----------------|-----|-----|------|
| 15 | 1-G7 | <i>Paraburkholderia strydomiana</i>    | RL17-347-BIE-B | SUB12338458 | PRJNA930029 | SAMN32981031 | JAQQCJ000000000 | 7.5 | 91  | 63.6 |
| 16 | 1-G8 | <i>Paraburkholderia phytofirmans</i>   | RL17-350-BIB-A | SUB12338458 | PRJNA930029 | SAMN32981032 | JAQQCK000000000 | 7.5 | 52  | 62.6 |
| 17 | 1-G9 | <i>Paraburkholderia strydomiana</i>    | RL17-350-BIC-E | SUB12338458 | PRJNA930029 | SAMN32981033 | JAQQCL000000000 | 7.9 | 107 | 63.1 |
| 18 | 1-H5 | <i>Paraburkholderia strydomiana</i>    | RL17-350-BIF-D | SUB12338458 | PRJNA930029 | SAMN32981034 | JAQQCM000000000 | 7.2 | 56  | 61.8 |
| 19 | 1-I1 | <i>Paraburkholderia strydomiana</i>    | RL17-351-BIC-C | SUB12338458 | PRJNA930029 | SAMN32981035 | JAQQCN000000000 | 7.6 | 49  | 61.7 |
| 20 | 1-I2 | <i>Paraburkholderia strydomiana</i>    | RL17-351-BIC-D | SUB12338458 | PRJNA930029 | SAMN32981036 | JAQQCO000000000 | 7.4 | 72  | 61.8 |
| 21 | 2-B1 | <i>Paraburkholderia graminis</i>       | RL17-355-BIE-A | SUB12338458 | PRJNA930029 | SAMN32981037 | JAQQCP000000000 | 7.2 | 62  | 62.8 |
| 22 | 2-C4 | <i>Paraburkholderia sp.</i>            | RL17-368-BIF-A | SUB12338458 | PRJNA930029 | SAMN32981038 | JARESN000000000 | 7.4 | 181 | 64.0 |
| 23 | 2-C5 | <i>Paraburkholderia caffeinilytica</i> | RL17-332-BIF-A | SUB12338458 | PRJNA930029 | SAMN32981039 | JAQQCQ000000000 | 7.3 | 77  | 61.2 |
| 24 | 2-C6 | <i>Paraburkholderia sedimicola</i>     | RL17-333-BIC-A | SUB12338458 | PRJNA930029 | SAMN32981040 | JAQQCR000000000 | 7.3 | 362 | 61.5 |
| 25 | 2-D3 | <i>Paraburkholderia graminis</i>       | RL17-368-BIF-C | SUB12338458 | PRJNA930029 | SAMN32981041 | JAQQCS000000000 | 7.4 | 586 | 62.7 |
| 26 | 2-D4 | <i>Paraburkholderia graminis</i>       | RL17-369-BIB-A | SUB12338458 | PRJNA930029 | SAMN32981042 | JAQQCT000000000 | 7.5 | 80  | 63.1 |
| 27 | 2-D9 | <i>Paraburkholderia strydomiana</i>    | RL17-353-BIB-A | SUB12338458 | PRJNA930029 | SAMN32981043 | JAQQCU000000000 | 8.1 | 41  | 61.9 |
| 28 | 2-E2 | <i>Paraburkholderia sedimicola</i>     | RL17-357-BIB-A | SUB12338458 | PRJNA930029 | SAMN32981044 | JAQQCV000000000 | 7.3 | 217 | 61.9 |
| 29 | 2-E4 | <i>Paraburkholderia caledonica</i>     | RL17-369-BIB-B | SUB12338458 | PRJNA930029 | SAMN32981045 | JAQQCW000000000 | 7.8 | 138 | 62.1 |
| 30 | 2-E7 | <i>Paraburkholderia caledonica</i>     | RL17-371-BIF-A | SUB12338458 | PRJNA930029 | SAMN32981046 | JAQQCX000000000 | 7.3 | 124 | 62.5 |
| 31 | 2-F1 | <i>Paraburkholderia strydomiana</i>    | RL17-373-BIB-B | SUB12338458 | PRJNA930029 | SAMN32981047 | JAQQCY000000000 | 7.8 | 42  | 61.7 |

|    |      |                                         |                |             |             |              |                 |      |     |      |
|----|------|-----------------------------------------|----------------|-------------|-------------|--------------|-----------------|------|-----|------|
| 32 | 2-F2 | <i>Paraburkholderia strydomiana</i>     | RL17-373-BIB-D | SUB12338458 | PRJNA930029 | SAMN32981048 | JAQQCZ000000000 | 7.8  | 38  | 62.4 |
| 33 | 2-F3 | <i>Paraburkholderia sp.</i>             | RL17-373-BIF-A | SUB12338458 | PRJNA930029 | SAMN32981049 | JARESO000000000 | 7.8  | 594 | 62.5 |
| 34 | 2-F4 | <i>Paraburkholderia strydomiana</i>     | RL17-373-BIF-C | SUB12338458 | PRJNA930029 | SAMN32981050 | JAQQDA000000000 | 7.8  | 95  | 62.3 |
| 35 | 2-F8 | <i>Caballeronia jiangsuensis</i>        | RL17-374-BIF-D | SUB12338458 | PRJNA930029 | SAMN32981051 | JAQQDB000000000 | 8.5  | 168 | 61.5 |
| 36 | 2-F9 | <i>Paraburkholderia sedimicola</i>      | RL17-376-BIF-A | SUB12338458 | PRJNA930029 | SAMN32981052 | JARESP000000000 | 8.8  | 250 | 63.1 |
| 37 | 2-G2 | <i>Paraburkholderia aspalathi</i>       | RL17-376-BIF-C | SUB12338458 | PRJNA930029 | SAMN32981053 | JAQQDC000000000 | 11.4 | 72  | 60.8 |
| 38 | 2-G4 | <i>Paraburkholderia strydomiana</i>     | RL17-378-BIB-A | SUB12338458 | PRJNA930029 | SAMN32981054 | JAQQDD000000000 | 8.8  | 166 | 62.2 |
| 39 | 2-G5 | <i>Paraburkholderia strydomiana</i>     | RL17-378-BIF-A | SUB12338458 | PRJNA930029 | SAMN32981055 | JAQQDE000000000 | 8.3  | 50  | 62.0 |
| 40 | 2-G6 | <i>Paraburkholderia dipogonis</i>       | RL17-378-BIF-B | SUB12338458 | PRJNA930029 | SAMN32981056 | JAQQDF000000000 | 11.4 | 100 | 62.3 |
| 41 | 2-G7 | <i>Paraburkholderia nemoris</i>         | RL17-379-BIB-A | SUB12338458 | PRJNA930029 | SAMN32981057 | JAQQDG000000000 | 9.7  | 121 | 61.5 |
| 42 | 2-G8 | <i>Paraburkholderia strydomiana</i>     | RL17-379-BIB-C | SUB12338458 | PRJNA930029 | SAMN32981058 | JAQQDH000000000 | 8.2  | 70  | 61.7 |
| 43 | 2-G9 | <i>Paraburkholderia aspalathi</i>       | RL17-379-BIF-A | SUB12338458 | PRJNA930029 | SAMN32981059 | JAQQDI000000000 | 9.7  | 47  | 61.7 |
| 44 | 2-H1 | <i>Paraburkholderia phytofirmans</i>    | RL17-379-BIF-B | SUB12338458 | PRJNA930029 | SAMN32981060 | JAQQDJ000000000 | 8.2  | 59  | 62.2 |
| 45 | 2-H2 | <i>Paraburkholderia nemoris</i>         | RL17-380-BIB-A | SUB12338458 | PRJNA930029 | SAMN32981061 | JAQQDK000000000 | 7.7  | 74  | 62.1 |
| 46 | 2-H3 | <i>Paraburkholderia sp.</i>             | RL17-380-BIE-A | SUB12338458 | PRJNA930029 | SAMN32981062 | JARESQ000000000 | 10.9 | 79  | 62.6 |
| 47 | 2-H4 | <i>Paraburkholderia dipogonis</i>       | RL17-381-BIB-A | SUB12338458 | PRJNA930029 | SAMN32981063 | JAQQDL000000000 | 10.1 | 240 | 61.4 |
| 48 | 2-H5 | <i>Paraburkholderia aromaticivorans</i> | RL17-381-BIB-B | SUB12338458 | PRJNA930029 | SAMN32981064 | JAQQDM000000000 | 8.6  | 79  | 62.4 |

|    |      |                                                |                |             |             |              |                 |      |     |      |
|----|------|------------------------------------------------|----------------|-------------|-------------|--------------|-----------------|------|-----|------|
| 49 | 2-H8 | <i>Paraburkholderia</i><br><i>sp.</i>          | RL17-383-BIF-A | SUB12338458 | PRJNA930029 | SAMN32981065 | JARES000000000  | 8.6  | 103 | 61.7 |
| 50 | 2-H9 | <i>Paraburkholderia</i><br><i>caledonica</i>   | RL17-383-BIF-B | SUB12338458 | PRJNA930029 | SAMN32981066 | JAQQDN000000000 | 7.9  | 80  | 62.4 |
| 51 | 2-I1 | <i>Caballeronia</i><br><i>grimmiae</i>         | RL17-374-BIB-E | SUB12338458 | PRJNA930029 | SAMN32981067 | JAQQDO000000000 | 8.8  | 193 | 64.2 |
| 52 | 2-I2 | <i>Paraburkholderia</i><br><i>strydomiana</i>  | RL17-376-BIB-A | SUB12338458 | PRJNA930029 | SAMN32981068 | JAQQDP000000000 | 8.0  | 69  | 61.7 |
| 53 | 2-I6 | <i>Paraburkholderia</i><br><i>strydomiana</i>  | RL17-379-BIB-D | SUB12338458 | PRJNA930029 | SAMN32981069 | JAQQDQ000000000 | 10.6 | 72  | 61.7 |
| 54 | 2-I8 | <i>Paraburkholderia</i><br><i>sp.</i>          | RL17-347-BIC-D | SUB12338458 | PRJNA930029 | SAMN32981070 | JARESS000000000 | 7.7  | 317 | 62.2 |
| 55 | 2-I9 | <i>Paraburkholderia</i><br><i>phytofirmans</i> | RL17-351-BIE-A | SUB12338458 | PRJNA930029 | SAMN32981071 | JAQQDR000000000 | 10.3 | 44  | 62.5 |
| 56 | 3-A2 | <i>Paraburkholderia</i><br><i>strydomiana</i>  | RL17-378-BIB-B | SUB12338458 | PRJNA930029 | SAMN32981072 | JAQQDS000000000 | 9.3  | 136 | 62.0 |
| 57 | 3-A6 | <i>Paraburkholderia</i><br><i>memoris</i>      | RL17-376-BIF-D | SUB12338458 | PRJNA930029 | SAMN32981073 | JAQQDT000000000 | 10.0 | 56  | 61.3 |
| 58 | 3-B1 | <i>Paraburkholderia</i><br><i>sedimicola</i>   | RL18-035-BIC-A | SUB12338458 | PRJNA930029 | SAMN32981074 | JAQQDU000000000 | 10.2 | 306 | 62.0 |
| 59 | 3-B2 | <i>Paraburkholderia</i><br><i>sedimicola</i>   | RL18-035-BIE-A | SUB12338458 | PRJNA930029 | SAMN32981075 | JAREST000000000 | 10.5 | 211 | 62.9 |
| 60 | 3-B5 | <i>Paraburkholderia</i><br><i>sedimicola</i>   | RL18-007-BIE-A | SUB12338458 | PRJNA930029 | SAMN32981076 | JAQQDV000000000 | 8.5  | 230 | 62.8 |
| 61 | 3-A9 | <i>Paraburkholderia</i><br><i>rhynchosiae</i>  | RL18-126-BIB-B | SUB12338458 | PRJNA930029 | SAMN32981077 | JAQQDW000000000 | 8.2  | 376 | 64.2 |
| 62 | 3-B6 | <i>Paraburkholderia</i><br><i>memoris</i>      | RL18-009-BIC-B | SUB12338458 | PRJNA930029 | SAMN32981078 | JAQQDX000000000 | 7.6  | 124 | 60.3 |
| 63 | 3-B9 | <i>Paraburkholderia</i><br><i>sedimicola</i>   | RL18-021-BIF-A | SUB12338458 | PRJNA930029 | SAMN32981079 | JAQQDY000000000 | 9.2  | 181 | 61.6 |
| 64 | 3-C2 | <i>Paraburkholderia</i><br><i>sedimicola</i>   | RL18-056-BIE-A | SUB12338458 | PRJNA930029 | SAMN32981080 | JAQQDZ000000000 | 10.1 | 171 | 61.6 |
| 65 | 3-C4 | <i>Paraburkholderia</i><br><i>memoris</i>      | RL18-011-BIC-A | SUB12338458 | PRJNA930029 | SAMN32981081 | JAQQEA000000000 | 8.6  | 112 | 60.5 |



|    |      |                                      |                |             |             |              |                 |      |     |      |
|----|------|--------------------------------------|----------------|-------------|-------------|--------------|-----------------|------|-----|------|
| 66 | 3-C5 | <i>Paraburkholderia sediminicola</i> | RL18-012-BIE-A | SUB12338458 | PRJNA930029 | SAMN32981082 | JAQQEB000000000 | 8.3  | 222 | 60.5 |
| 67 | 3-C8 | <i>Paraburkholderia sediminicola</i> | RL18-081-BIC-C | SUB12338458 | PRJNA930029 | SAMN32981083 | JAQQEC000000000 | 10.6 | 231 | 62.4 |
| 68 | 3-D3 | <i>Paraburkholderia nemoris</i>      | RL18-043-BIE-A | SUB12338458 | PRJNA930029 | SAMN32981084 | JAQQED000000000 | 10.3 | 78  | 60.6 |
| 69 | 3-D4 | <i>Paraburkholderia sediminicola</i> | RL18-082-BIB-A | SUB12338458 | PRJNA930029 | SAMN32981085 | JAQQEE000000000 | 8.8  | 233 | 62.1 |
| 70 | 3-D5 | <i>Paraburkholderia fungorum</i>     | RL18-106-BIC-A | SUB12338458 | PRJNA930029 | SAMN32981086 | JAQQEF000000000 | 7.8  | 106 | 61.5 |
| 71 | 3-D6 | <i>Paraburkholderia dipogonis</i>    | RL18-106-BIC-C | SUB12338458 | PRJNA930029 | SAMN32981087 | JAQQEG000000000 | 8.3  | 146 | 62.6 |
| 72 | 3-D7 | <i>Paraburkholderia sediminicola</i> | RL18-106-BID-A | SUB12338458 | PRJNA930029 | SAMN32981088 | JAQQEH000000000 | 10.2 | 136 | 61.9 |
| 73 | 3-E1 | <i>Paraburkholderia aspalathi</i>    | RL18-012-BIC-A | SUB12338458 | PRJNA930029 | SAMN32981089 | JAQQEI000000000 | 9.7  | 114 | 61.3 |
| 74 | 3-E2 | <i>Paraburkholderia sediminicola</i> | RL18-014-BIF-A | SUB12338458 | PRJNA930029 | SAMN32981090 | JAQQEJ000000000 | 8.4  | 247 | 61.8 |
| 75 | 3-E8 | <i>Paraburkholderia sediminicola</i> | RL18-017-BIF-B | SUB12338458 | PRJNA930029 | SAMN32981091 | JAQQEK000000000 | 8.6  | 174 | 62.4 |
| 76 | 3-E9 | <i>Paraburkholderia megapolitana</i> | RL18-039-BIC-B | SUB12338458 | PRJNA930029 | SAMN32981092 | JAQQEL000000000 | 8.4  | 2   | 62.1 |
| 77 | 3-F3 | <i>Paraburkholderia aspalathi</i>    | RL18-139-BIC-B | SUB12338458 | PRJNA930029 | SAMN32981093 | JAQQEM000000000 | 8.3  | 66  | 62.4 |
| 78 | 3-F6 | <i>Paraburkholderia fungorum</i>     | RL18-167-BIC-A | SUB12338458 | PRJNA930029 | SAMN32981094 | JAQQEN000000000 | 9.7  | 4   | 61.9 |
| 79 | 3-F7 | <i>Caballeronia glebae</i>           | RL18-006-BIC-A | SUB12338458 | PRJNA930029 | SAMN32981095 | JAQQEO000000000 | 8.6  | 178 | 63.7 |
| 80 | 3-F9 | <i>Paraburkholderia sediminicola</i> | RL18-106-BIB-A | SUB12338458 | PRJNA930029 | SAMN32981096 | JAQQEP000000000 | 9.4  | 154 | 61.5 |
| 81 | 3-G1 | <i>Paraburkholderia sediminicola</i> | RL18-114-BIF-A | SUB12338458 | PRJNA930029 | SAMN32981097 | JAQQEQ000000000 | 9.9  | 165 | 61.8 |
| 82 | 3-G5 | <i>Paraburkholderia sp.</i>          | RL18-085-BIA-A | SUB12338458 | PRJNA930029 | SAMN32981098 | JARESU000000000 | 8.7  | 747 | 63.6 |

|    |      |                                      |                |             |             |              |                 |      |     |      |
|----|------|--------------------------------------|----------------|-------------|-------------|--------------|-----------------|------|-----|------|
| 83 | 3-G9 | <i>Paraburkholderia sp.</i>          | RL18-101-BIB-B | SUB12338458 | PRJNA930029 | SAMN32981099 | JARESV000000000 | 8.8  | 261 | 62.7 |
| 84 | 3-H1 | <i>Paraburkholderia aspalathi</i>    | RL18-101-BIC-A | SUB12338458 | PRJNA930029 | SAMN32981100 | JAQQR000000000  | 8.9  | 65  | 62.3 |
| 85 | 3-H3 | <i>Paraburkholderia sedimicola</i>   | RL18-154-BIB-A | SUB12338458 | PRJNA930029 | SAMN32981101 | JARESW000000000 | 9.0  | 200 | 60.4 |
| 86 | 3-H5 | <i>Paraburkholderia sedimicola</i>   | RL18-079-BIE-A | SUB12338458 | PRJNA930029 | SAMN32981102 | JAQQES000000000 | 9.4  | 378 | 61.3 |
| 87 | 3-H6 | <i>Paraburkholderia sedimicola</i>   | RL18-120-BIB-A | SUB12338458 | PRJNA930029 | SAMN32981103 | JAQQET000000000 | 9.4  | 122 | 61.8 |
| 88 | 3-H8 | <i>Paraburkholderia sedimicola</i>   | RL18-126-BIB-A | SUB12338458 | PRJNA930029 | SAMN32981104 | JAQQEU000000000 | 8.6  | 334 | 62.5 |
| 89 | 3-I1 | <i>Paraburkholderia aspalathi</i>    | RL18-045-BIB-A | SUB12338458 | PRJNA930029 | SAMN32981105 | JAQQEV000000000 | 9.5  | 287 | 60.3 |
| 90 | 3-I5 | <i>Paraburkholderia sedimicola</i>   | RL18-085-BIF-A | SUB12338458 | PRJNA930029 | SAMN32981106 | JAQQEW000000000 | 8.8  | 194 | 61.7 |
| 91 | 1-B6 | <i>Paraburkholderia sedimicola</i>   | RL17-333-BIE-A | SUB12338458 | PRJNA930029 | SAMN32981107 | JAQQEX000000000 | 9.6  | 391 | 60.8 |
| 92 | 1-F8 | <i>Paraburkholderia sedimicola</i>   | RL17-342-BIF-A | SUB12338458 | PRJNA930029 | SAMN32981108 | JAQQEY000000000 | 8.8  | 3   | 60.8 |
| 93 | 1-G3 | <i>Paraburkholderia dipogonis</i>    | RL17-350-BIC-A | SUB12338458 | PRJNA930029 | SAMN32981109 | JAQQEZ000000000 | 9.9  | 277 | 62.8 |
| 94 | 1-H1 | <i>Paraburkholderia azotifigens</i>  | RL17-350-BID-B | SUB12338458 | PRJNA930029 | SAMN32981110 | JAQQFA000000000 | 8.3  | 129 | 63.4 |
| 95 | 2-E6 | <i>Paraburkholderia strydomiana</i>  | RL17-368-BIB-B | SUB12338458 | PRJNA930029 | SAMN32981111 | JAQQFB000000000 | 8.8  | 112 | 62.2 |
| 96 | 2-E8 | <i>Caballeronia grimmiae</i>         | RL17-372-BIF-A | SUB12338458 | PRJNA930029 | SAMN32981112 | JAQQFC000000000 | 10.2 | 115 | 62.0 |
| 97 | 2-E9 | <i>Paraburkholderia graminis</i>     | RL17-372-BIF-C | SUB12338458 | PRJNA930029 | SAMN32981113 | JAQQFD000000000 | 9.1  | 92  | 62.7 |
| 98 | 2-G3 | <i>Paraburkholderia phytofirmans</i> | RL17-377-BIF-A | SUB12338458 | PRJNA930029 | SAMN32981114 | JAQQFE000000000 | 8.4  | 121 | 62.8 |
| 99 | 2-H6 | <i>Paraburkholderia sp.</i>          | RL17-381-BIF-C | SUB12338458 | PRJNA930029 | SAMN32981115 | JARESX000000000 | 9.1  | 290 | 61.9 |

|     |      |                                      |                |             |             |              |                 |      |     |      |
|-----|------|--------------------------------------|----------------|-------------|-------------|--------------|-----------------|------|-----|------|
| 100 | 3-A1 | <i>Paraburkholderia graminis</i>     | RL17-369-BIF-A | SUB12338458 | PRJNA930029 | SAMN32981116 | JAQQFF000000000 | 9.1  | 87  | 62.7 |
| 101 | 3-D2 | <i>Paraburkholderia nemoris</i>      | RL18-043-BID-A | SUB12338458 | PRJNA930029 | SAMN32981117 | JAQQFG000000000 | 8.7  | 3   | 61.8 |
| 102 | 1-C1 | <i>Paraburkholderia agricolaris</i>  | RL17-342-BIF-B | SUB12338458 | PRJNA930029 | SAMN32981118 | JAQQFH000000000 | 9.1  | 146 | 62.3 |
| 103 | 1-D8 | <i>Paraburkholderia acidicola</i>    | RL17-338-BIF-B | SUB11958114 | PRJNA875462 | SAMN30619028 | JAQALG000000000 | 9.3  | 6   | 61.8 |
| 104 | 3-C1 | <i>Paraburkholderia fungorum</i>     | RL18-030-BIB-A | SUB12338458 | PRJNA930029 | SAMN32981119 | JAQQFI000000000 | 10.9 | 175 | 62.5 |
| 105 | 3-E3 | <i>Paraburkholderia madseniana</i>   | RL18-015-BIC-B | SUB12338458 | PRJNA930029 | SAMN32981120 | JAQQFJ000000000 | 9.0  | 206 | 61.8 |
| 106 | 4-F6 | <i>Paraburkholderia agricolaris</i>  | RL19-001-BIB-A | SUB12338458 | PRJNA930029 | SAMN32981121 | JAQQFK000000000 | 8.9  | 167 | 62.0 |
| 107 | 4-H5 | <i>Paraburkholderia fungorum</i>     | RL19-015-BID-A | SUB12338458 | PRJNA930029 | SAMN32981122 | JAQQFL000000000 | 9.0  | 115 | 62.5 |
| 108 | 5-A2 | <i>Herbaspirillum lusitanum</i>      | RL21-008-BIB-A | SUB12338458 | PRJNA930029 | SAMN32981123 | JAQQFM000000000 | 9.5  | 46  | 60.3 |
| 109 | 5-A3 | <i>Paraburkholderia agricolaris</i>  | RL16-012-BIC-B | SUB12338458 | PRJNA930029 | SAMN32981124 | JAQQFN000000000 | 9.6  | 132 | 62.3 |
| 110 | 5-A5 | <i>Paraburkholderia fungorum</i>     | RL17-336-BIC-C | SUB12338458 | PRJNA930029 | SAMN32981125 | JAQQFO000000000 | 8.5  | 4   | 61.8 |
| 111 | 5-A6 | <i>Paraburkholderia sp.</i>          | RL17-337-BIB-A | SUB12338458 | PRJNA930029 | SAMN32981126 | JARESY000000000 | 8.6  | 4   | 61.6 |
| 112 | 5-A7 | <i>Paraburkholderia megapolitana</i> | RL17-339-BIF-C | SUB12338458 | PRJNA930029 | SAMN32981127 | JAQQFP000000000 | 9.0  | 4   | 62.2 |
| 113 | 5-A8 | <i>Paraburkholderia madseniana</i>   | RL17-342-BIB-A | SUB12338458 | PRJNA930029 | SAMN32981128 | JAQQFQ000000000 | 10.4 | 234 | 61.8 |
| 114 | 5-A9 | <i>Herbaspirillum rhizosphaerae</i>  | RL21-008-BIB-B | SUB12338458 | PRJNA930029 | SAMN32981129 | JAQQFR000000000 | 10.8 | 40  | 57.9 |
| 115 | 5-B2 | <i>Paraburkholderia sp.</i>          | RL18-103-BIB-C | SUB12338458 | PRJNA930029 | SAMN32981130 | JARESZ000000000 | 9.6  | 780 | 63.4 |

**Table S2. Sequencing technology and assembly details for the 115 Burkholderiales strains.**

| No. | Sample Name | Organism                               | Strain code    | Assembly Date | Assembly method/Version | Genome Coverage | Sequencing Technology |
|-----|-------------|----------------------------------------|----------------|---------------|-------------------------|-----------------|-----------------------|
| 1   | 1-A4        | <i>Paraburkholderia xenovorans</i>     | RL17-329-BIC-A | 2021-03-03    | Unicycler Mar-2021.     | 93.2            | Illumina              |
| 2   | 1-A6        | <i>Paraburkholderia nemoris</i>        | RL17-333-BIC-B | 2021-03-03    | Unicycler Mar-2021.     | 83.2            | Illumina              |
| 3   | 1-B2        | <i>Paraburkholderia sediminicola</i>   | RL17-328-BIB-A | 2021-03-03    | Unicycler Mar-2021.     | 65.7            | Illumina              |
| 4   | 1-B5        | <i>Paraburkholderia sediminicola</i>   | RL17-333-BID-A | 2021-03-03    | Unicycler Mar-2021.     | 46.5            | Illumina              |
| 5   | 1-B9        | <i>Paraburkholderia dilworthii</i>     | RL17-335-BIF-A | 2021-03-03    | Unicycler Mar-2021.     | 81.6            | Illumina              |
| 6   | 1-C2        | <i>Paraburkholderia sediminicola</i>   | RL17-337-BIC-A | 2021-03-03    | Unicycler Mar-2021.     | 88.6            | Illumina              |
| 7   | 1-C4        | <i>Paraburkholderia xenovorans</i>     | RL17-337-BIC-C | 2021-03-03    | Unicycler Mar-2021.     | 80.0            | Illumina              |
| 8   | 1-C8        | <i>Paraburkholderia sediminicola</i>   | RL17-338-BIB-A | 2021-03-03    | Unicycler Mar-2021.     | 92.5            | Illumina              |
| 9   | 1-C9        | <i>Paraburkholderia sediminicola</i>   | RL17-333-BIE-B | 2021-03-03    | Unicycler Mar-2021.     | 56.0            | Illumina              |
| 10  | 1-D2        | <i>Paraburkholderia sediminicola</i>   | RL17-336-BIC-B | 2021-03-03    | Unicycler Mar-2021.     | 71.2            | Illumina              |
| 11  | 1-D4        | <i>Paraburkholderia metrosideri</i>    | RL17-338-BIC-A | 2021-03-03    | Unicycler Mar-2021.     | 72.3            | Illumina              |
| 12  | 1-D9        | <i>Paraburkholderia bryophila</i>      | RL17-338-BIF-C | 2021-03-03    | Unicycler Mar-2021.     | 111.8           | Illumina              |
| 13  | 1-E8        | <i>Paraburkholderia sediminicola</i>   | RL17-340-BIC-B | 2021-03-03    | Unicycler Mar-2021.     | 110.6           | Illumina              |
| 14  | 1-F6        | <i>Paraburkholderia strydomiana</i>    | RL17-350-BID-A | 2021-03-03    | Unicycler Mar-2021.     | 85.0            | Illumina              |
| 15  | 1-G7        | <i>Paraburkholderia strydomiana</i>    | RL17-347-BIE-B | 2021-03-03    | Unicycler Mar-2021.     | 71.7            | Illumina              |
| 16  | 1-G8        | <i>Paraburkholderia phytofirmans</i>   | RL17-350-BIB-A | 2021-03-03    | Unicycler Mar-2021.     | 63.1            | Illumina              |
| 17  | 1-G9        | <i>Paraburkholderia strydomiana</i>    | RL17-350-BIC-E | 2021-03-03    | Unicycler Mar-2021.     | 70.5            | Illumina              |
| 18  | 1-H5        | <i>Paraburkholderia strydomiana</i>    | RL17-350-BIF-D | 2021-03-03    | Unicycler Mar-2021.     | 82.7            | Illumina              |
| 19  | 1-I1        | <i>Paraburkholderia strydomiana</i>    | RL17-351-BIC-C | 2021-03-03    | Unicycler Mar-2021.     | 90.0            | Illumina              |
| 20  | 1-I2        | <i>Paraburkholderia strydomiana</i>    | RL17-351-BIC-D | 2021-03-03    | Unicycler Mar-2021.     | 82.5            | Illumina              |
| 21  | 2-B1        | <i>Paraburkholderia graminis</i>       | RL17-355-BIE-A | 2021-03-03    | Unicycler Mar-2021.     | 81.1            | Illumina              |
| 22  | 2-C4        | <i>Paraburkholderia sp.</i>            | RL17-368-BIF-A | 2021-03-03    | Unicycler Mar-2021.     | 46.7            | Illumina              |
| 23  | 2-C5        | <i>Paraburkholderia caffeinilytica</i> | RL17-332-BIF-A | 2021-03-03    | Unicycler Mar-2021.     | 67.9            | Illumina              |

|    |      |                                         |                |            |                     |       |          |
|----|------|-----------------------------------------|----------------|------------|---------------------|-------|----------|
| 24 | 2-C6 | <i>Paraburkholderia sedimicola</i>      | RL17-333-BIC-A | 2021-03-03 | Unicycler Mar-2021. | 58.7  | Illumina |
| 25 | 2-D3 | <i>Paraburkholderia graminis</i>        | RL17-368-BIF-C | 2021-03-03 | Unicycler Mar-2021. | 95.7  | Illumina |
| 26 | 2-D4 | <i>Paraburkholderia graminis</i>        | RL17-369-BIB-A | 2021-03-03 | Unicycler Mar-2021. | 90.9  | Illumina |
| 27 | 2-D9 | <i>Paraburkholderia strydomiana</i>     | RL17-353-BIB-A | 2021-03-03 | Unicycler Mar-2021. | 60.9  | Illumina |
| 28 | 2-E2 | <i>Paraburkholderia sedimicola</i>      | RL17-357-BIB-A | 2021-03-03 | Unicycler Mar-2021. | 33.6  | Illumina |
| 29 | 2-E4 | <i>Paraburkholderia caledonica</i>      | RL17-369-BIB-B | 2021-03-03 | Unicycler Mar-2021. | 65.8  | Illumina |
| 30 | 2-E7 | <i>Paraburkholderia caledonica</i>      | RL17-371-BIF-A | 2021-03-03 | Unicycler Mar-2021. | 70.6  | Illumina |
| 31 | 2-F1 | <i>Paraburkholderia strydomiana</i>     | RL17-373-BIB-B | 2021-03-03 | Unicycler Mar-2021. | 79.4  | Illumina |
| 32 | 2-F2 | <i>Paraburkholderia strydomiana</i>     | RL17-373-BIB-D | 2021-03-03 | Unicycler Mar-2021. | 73.8  | Illumina |
| 33 | 2-F3 | <i>Paraburkholderia sp.</i>             | RL17-373-BIF-A | 2021-03-03 | Unicycler Mar-2021. | 56.6  | Illumina |
| 34 | 2-F4 | <i>Paraburkholderia strydomiana</i>     | RL17-373-BIF-C | 2021-03-03 | Unicycler Mar-2021. | 81.9  | Illumina |
| 35 | 2-F8 | <i>Caballeronia jiangsuensis</i>        | RL17-374-BIF-D | 2021-03-03 | Unicycler Mar-2021. | 61.5  | Illumina |
| 36 | 2-F9 | <i>Paraburkholderia sedimicola</i>      | RL17-376-BIF-A | 2021-03-03 | Unicycler Mar-2021. | 47.1  | Illumina |
| 37 | 2-G2 | <i>Paraburkholderia aspalathi</i>       | RL17-376-BIF-C | 2021-03-03 | Unicycler Mar-2021. | 89.2  | Illumina |
| 38 | 2-G4 | <i>Paraburkholderia strydomiana</i>     | RL17-378-BIB-A | 2021-03-03 | Unicycler Mar-2021. | 91.1  | Illumina |
| 39 | 2-G5 | <i>Paraburkholderia strydomiana</i>     | RL17-378-BIF-A | 2021-03-03 | Unicycler Mar-2021. | 108.8 | Illumina |
| 40 | 2-G6 | <i>Paraburkholderia dipogonis</i>       | RL17-378-BIF-B | 2021-03-03 | Unicycler Mar-2021. | 123.7 | Illumina |
| 41 | 2-G7 | <i>Paraburkholderia nemoris</i>         | RL17-379-BIB-A | 2021-03-03 | Unicycler Mar-2021. | 86.1  | Illumina |
| 42 | 2-G8 | <i>Paraburkholderia strydomiana</i>     | RL17-379-BIB-C | 2021-03-03 | Unicycler Mar-2021. | 100.6 | Illumina |
| 43 | 2-G9 | <i>Paraburkholderia aspalathi</i>       | RL17-379-BIF-A | 2021-03-03 | Unicycler Mar-2021. | 81.2  | Illumina |
| 44 | 2-H1 | <i>Paraburkholderia phytofirmans</i>    | RL17-379-BIF-B | 2021-03-03 | Unicycler Mar-2021. | 110.6 | Illumina |
| 45 | 2-H2 | <i>Paraburkholderia nemoris</i>         | RL17-380-BIB-A | 2021-03-03 | Unicycler Mar-2021. | 87.6  | Illumina |
| 46 | 2-H3 | <i>Paraburkholderia sp.</i>             | RL17-380-BIE-A | 2021-03-03 | Unicycler Mar-2021. | 91.9  | Illumina |
| 47 | 2-H4 | <i>Paraburkholderia dipogonis</i>       | RL17-381-BIB-A | 2021-03-03 | Unicycler Mar-2021. | 80.1  | Illumina |
| 48 | 2-H5 | <i>Paraburkholderia aromaticivorans</i> | RL17-381-BIB-B | 2021-03-03 | Unicycler Mar-2021. | 76.9  | Illumina |
| 49 | 2-H8 | <i>Paraburkholderia sp.</i>             | RL17-383-BIF-A | 2021-03-03 | Unicycler Mar-2021. | 108.8 | Illumina |

|    |      |                                      |                |            |                     |       |                            |
|----|------|--------------------------------------|----------------|------------|---------------------|-------|----------------------------|
| 50 | 2-H9 | <i>Paraburkholderia caledonica</i>   | RL17-383-BIF-B | 2021-03-03 | Unicycler Mar-2021. | 131.3 | Illumina                   |
| 51 | 2-I1 | <i>Caballeronia grimmiae</i>         | RL17-374-BIB-E | 2021-03-03 | Unicycler Mar-2021. | 86.1  | Illumina                   |
| 52 | 2-I2 | <i>Paraburkholderia strydomiana</i>  | RL17-376-BIB-A | 2021-03-03 | Unicycler Mar-2021. | 85.1  | Illumina                   |
| 53 | 2-I6 | <i>Paraburkholderia strydomiana</i>  | RL17-379-BIB-D | 2021-03-03 | Unicycler Mar-2021. | 93.9  | Illumina                   |
| 54 | 2-I8 | <i>Paraburkholderia sp.</i>          | RL17-347-BIC-D | 2021-03-03 | Unicycler Mar-2021. | 84.3  | Illumina                   |
| 55 | 2-I9 | <i>Paraburkholderia phytofirmans</i> | RL17-351-BIE-A | 2021-03-03 | Unicycler Mar-2021. | 110.3 | Illumina                   |
| 56 | 3-A2 | <i>Paraburkholderia strydomiana</i>  | RL17-378-BIB-B | 2021-03-03 | Unicycler Mar-2021. | 85.7  | Illumina                   |
| 57 | 3-A6 | <i>Paraburkholderia nemoris</i>      | RL17-376-BIF-D | 2021-03-03 | Unicycler Mar-2021. | 79.3  | Illumina                   |
| 58 | 3-B1 | <i>Paraburkholderia sedimicola</i>   | RL18-035-BIC-A | 2021-03-03 | Unicycler Mar-2021. | 53.3  | Illumina                   |
| 59 | 3-B2 | <i>Paraburkholderia sedimicola</i>   | RL18-035-BIE-A | 2021-03-03 | Unicycler Mar-2021. | 89.8  | Illumina                   |
| 60 | 3-B5 | <i>Paraburkholderia sedimicola</i>   | RL18-007-BIE-A | 2021-03-03 | Unicycler Mar-2021. | 64.4  | Illumina                   |
| 61 | 3-A9 | <i>Paraburkholderia rhynchosiae</i>  | RL18-126-BIB-B | 2021-03-03 | Unicycler Mar-2021. | 101.6 | Illumina                   |
| 62 | 3-B6 | <i>Paraburkholderia nemoris</i>      | RL18-009-BIC-B | 2021-03-03 | Unicycler Mar-2021. | 122.5 | Illumina                   |
| 63 | 3-B9 | <i>Paraburkholderia sedimicola</i>   | RL18-021-BIF-A | 2021-03-03 | Unicycler Mar-2021. | 80.1  | Illumina                   |
| 64 | 3-C2 | <i>Paraburkholderia sedimicola</i>   | RL18-056-BIE-A | 2021-03-03 | Unicycler Mar-2021. | 70.2  | Illumina                   |
| 65 | 3-C4 | <i>Paraburkholderia nemoris</i>      | RL18-011-BIC-A | 2021-03-03 | Unicycler Mar-2021. | 62.5  | Illumina                   |
| 66 | 3-C5 | <i>Paraburkholderia sedimicola</i>   | RL18-012-BIE-A | 2021-03-03 | Unicycler Mar-2021. | 69.0  | Illumina                   |
| 67 | 3-C8 | <i>Paraburkholderia sedimicola</i>   | RL18-081-BIC-C | 2021-03-03 | Unicycler Mar-2021. | 83.0  | Illumina                   |
| 68 | 3-D3 | <i>Paraburkholderia nemoris</i>      | RL18-043-BIE-A | 2021-03-03 | Unicycler Mar-2021. | 76.6  | Illumina                   |
| 69 | 3-D4 | <i>Paraburkholderia sedimicola</i>   | RL18-082-BIB-A | 2021-03-03 | Unicycler Mar-2021. | 65.2  | Illumina                   |
| 70 | 3-D5 | <i>Paraburkholderia fungorum</i>     | RL18-106-BIC-A | 2021-03-03 | Unicycler Mar-2021. | 78.1  | Illumina                   |
| 71 | 3-D6 | <i>Paraburkholderia dipogonis</i>    | RL18-106-BIC-C | 2021-03-03 | Unicycler Mar-2021. | 74.2  | Illumina                   |
| 72 | 3-D7 | <i>Paraburkholderia sedimicola</i>   | RL18-106-BID-A | 2021-03-03 | Unicycler Mar-2021. | 135.0 | Illumina                   |
| 73 | 3-E1 | <i>Paraburkholderia aspalathi</i>    | RL18-012-BIC-A | 2021-03-03 | Unicycler Mar-2021. | 107.7 | Illumina                   |
| 74 | 3-E2 | <i>Paraburkholderia sedimicola</i>   | RL18-014-BIF-A | 2021-03-03 | Unicycler Mar-2021. | 98.8  | Illumina                   |
| 75 | 3-E8 | <i>Paraburkholderia sedimicola</i>   | RL18-017-BIF-B | 2021-03-30 | Unicycler Mar-2021. | 97.3  | Illumina + Oxford Nanopore |

|     |      |                                      |                |            |                     |       |                            |
|-----|------|--------------------------------------|----------------|------------|---------------------|-------|----------------------------|
| 76  | 3-E9 | <i>Paraburkholderia megapolitana</i> | RL18-039-BIC-B | 2021-03-03 | Unicycler Mar-2021. | 190.3 | Illumina                   |
| 77  | 3-F3 | <i>Paraburkholderia aspalathi</i>    | RL18-139-BIC-B | 2021-03-30 | Unicycler Mar-2021. | 61.7  | Illumina + Oxford Nanopore |
| 78  | 3-F6 | <i>Paraburkholderia fungorum</i>     | RL18-167-BIC-A | 2021-03-03 | Unicycler Mar-2021. | 130.0 | Illumina                   |
| 79  | 3-F7 | <i>Caballeronia glebae</i>           | RL18-006-BIC-A | 2021-03-03 | Unicycler Mar-2021. | 92.6  | Illumina                   |
| 80  | 3-F9 | <i>Paraburkholderia sediminicola</i> | RL18-106-BIB-A | 2021-03-03 | Unicycler Mar-2021. | 71.1  | Illumina                   |
| 81  | 3-G1 | <i>Paraburkholderia sediminicola</i> | RL18-114-BIF-A | 2021-03-03 | Unicycler Mar-2021. | 69.0  | Illumina                   |
| 82  | 3-G5 | <i>Paraburkholderia sp.</i>          | RL18-085-BIA-A | 2021-03-03 | Unicycler Mar-2021. | 49.4  | Illumina                   |
| 83  | 3-G9 | <i>Paraburkholderia sp.</i>          | RL18-101-BIB-B | 2021-03-03 | Unicycler Mar-2021. | 76.2  | Illumina                   |
| 84  | 3-H1 | <i>Paraburkholderia aspalathi</i>    | RL18-101-BIC-A | 2021-03-03 | Unicycler Mar-2021. | 89.3  | Illumina                   |
| 85  | 3-H3 | <i>Paraburkholderia sediminicola</i> | RL18-154-BIB-A | 2021-03-03 | Unicycler Mar-2021. | 51.4  | Illumina                   |
| 86  | 3-H5 | <i>Paraburkholderia sediminicola</i> | RL18-079-BIE-A | 2021-03-03 | Unicycler Mar-2021. | 121.5 | Illumina                   |
| 87  | 3-H6 | <i>Paraburkholderia sediminicola</i> | RL18-120-BIB-A | 2021-03-03 | Unicycler Mar-2021. | 80.5  | Illumina                   |
| 88  | 3-H8 | <i>Paraburkholderia sediminicola</i> | RL18-126-BIB-A | 2021-03-03 | Unicycler Mar-2021. | 71.8  | Illumina                   |
| 89  | 3-I1 | <i>Paraburkholderia aspalathi</i>    | RL18-045-BIB-A | 2021-03-03 | Unicycler Mar-2021. | 67.5  | Illumina                   |
| 90  | 3-I5 | <i>Paraburkholderia sediminicola</i> | RL18-085-BIF-A | 2021-03-03 | Unicycler Mar-2021. | 75.4  | Illumina                   |
| 91  | 1-B6 | <i>Paraburkholderia sediminicola</i> | RL17-333-BIE-A | 2021-03-03 | Unicycler Mar-2021. | 56.8  | Illumina + Oxford Nanopore |
| 92  | 1-F8 | <i>Paraburkholderia sediminicola</i> | RL17-342-BIF-A | 2021-03-03 | Unicycler Mar-2021. | 105.7 | Illumina                   |
| 93  | 1-G3 | <i>Paraburkholderia dipogonis</i>    | RL17-350-BIC-A | 2021-03-03 | Unicycler Mar-2021. | 69.5  | Illumina                   |
| 94  | 1-H1 | <i>Paraburkholderia azotifigens</i>  | RL17-350-BID-B | 2021-03-03 | Unicycler Mar-2021. | 91.1  | Illumina                   |
| 95  | 2-E6 | <i>Paraburkholderia strydomiana</i>  | RL17-368-BIB-B | 2021-03-03 | Unicycler Mar-2021. | 65.8  | Illumina                   |
| 96  | 2-E8 | <i>Caballeronia grimmiae</i>         | RL17-372-BIF-A | 2021-03-03 | Unicycler Mar-2021. | 72.8  | Illumina                   |
| 97  | 2-E9 | <i>Paraburkholderia graminis</i>     | RL17-372-BIF-C | 2021-03-03 | Unicycler Mar-2021. | 58.1  | Illumina                   |
| 98  | 2-G3 | <i>Paraburkholderia phytofirmans</i> | RL17-377-BIF-A | 2021-03-03 | Unicycler Mar-2021. | 74.5  | Illumina                   |
| 99  | 2-H6 | <i>Paraburkholderia sp.</i>          | RL17-381-BIF-C | 2021-03-03 | Unicycler Mar-2021. | 61.4  | Illumina                   |
| 100 | 3-A1 | <i>Paraburkholderia graminis</i>     | RL17-369-BIF-A | 2021-03-03 | Unicycler Mar-2021. | 87.6  | Illumina + Oxford Nanopore |
| 101 | 3-D2 | <i>Paraburkholderia nemoris</i>      | RL18-043-BID-A | 2021-03-03 | Unicycler Mar-2021. | 112.9 | Illumina                   |

|     |      |                                      |                |            |                     |       |                            |
|-----|------|--------------------------------------|----------------|------------|---------------------|-------|----------------------------|
| 102 | 1-C1 | <i>Paraburkholderia agricolaris</i>  | RL17-342-BIF-B | 2021-05-28 | Unicycler May-2021. | 119.0 | Illumina                   |
| 103 | 1-D8 | <i>Paraburkholderia acidicola</i>    | RL17-338-BIF-B | 2022-03-08 | Unicycler Mar-2021. | 137.3 | Illumina + Oxford Nanopore |
| 104 | 3-C1 | <i>Paraburkholderia fungorum</i>     | RL18-030-BIB-A | 2021-05-28 | Unicycler May-2021. | 120.9 | Illumina                   |
| 105 | 3-E3 | <i>Paraburkholderia madseniana</i>   | RL18-015-BIC-B | 2021-05-28 | Unicycler May-2021. | 94.2  | Illumina                   |
| 106 | 4-F6 | <i>Paraburkholderia agricolaris</i>  | RL19-001-BIB-A | 2021-10-21 | Unicycler Oct-2021. | 64.0  | Illumina                   |
| 107 | 4-H5 | <i>Paraburkholderia fungorum</i>     | RL19-015-BID-A | 2021-10-21 | Unicycler Oct-2021. | 83.1  | Illumina                   |
| 108 | 5-A2 | <i>Herbaspirillum lusitanum</i>      | RL21-008-BIB-A | 2021-10-21 | Unicycler Oct-2021. | 142.5 | Illumina                   |
| 109 | 5-A3 | <i>Paraburkholderia agricolaris</i>  | RL16-012-BIC-B | 2021-10-21 | Unicycler Oct-2021. | 158.3 | Illumina                   |
| 110 | 5-A5 | <i>Paraburkholderia fungorum</i>     | RL17-336-BIC-C | 2022-03-08 | Unicycler Mar-2021. | 113.0 | Illumina + Oxford Nanopore |
| 111 | 5-A6 | <i>Paraburkholderia sp.</i>          | RL17-337-BIB-A | 2022-03-08 | Unicycler Mar-2021. | 67.6  | Illumina + Oxford Nanopore |
| 112 | 5-A7 | <i>Paraburkholderia megapolitana</i> | RL17-339-BIF-C | 2022-03-08 | Unicycler Mar-2021. | 118.3 | Illumina + Oxford Nanopore |
| 113 | 5-A8 | <i>Paraburkholderia madseniana</i>   | RL17-342-BIB-A | 2021-10-21 | Unicycler Oct-2021. | 104.6 | Illumina                   |
| 114 | 5-A9 | <i>Herbaspirillum rhizosphaerae</i>  | RL21-008-BIB-B | 2021-10-21 | Unicycler Oct-2021. | 128.9 | Illumina                   |
| 115 | 5-B2 | <i>Paraburkholderia sp.</i>          | RL18-103-BIB-C | 2021-10-21 | Unicycler Oct-2021. | 146.9 | Illumina                   |

**Table S3. Collection date, environmental context, and geographic sample location for the sequenced strains.**

| No. | Sample Name | Organism                             | Strain         | Collection Date | Broad-Scale Environmental context           | Local-Scale Environmental context       | Environmental Medium         | Geographic location      | Latitude and Longitude |
|-----|-------------|--------------------------------------|----------------|-----------------|---------------------------------------------|-----------------------------------------|------------------------------|--------------------------|------------------------|
| 1   | 1-A4        | <i>Paraburkholderia xenovorans</i>   | RL17-329-BIC-A | 2017-02-25      | temperate Coniferous Forest [ENVO:01000211] | rhizosphere environment [ENVO:01000999] | plant matter [ENVO:01001121] | Canada: British Columbia | 49.62 N 123.19 W       |
| 2   | 1-A6        | <i>Paraburkholderia nemoris</i>      | RL17-333-BIC-B | 2017-02-25      | temperate Coniferous Forest [ENVO:01000211] | rhizosphere environment [ENVO:01000999] | plant matter [ENVO:01001121] | Canada: British Columbia | 49.42 N 123.49 W       |
| 3   | 1-B2        | <i>Paraburkholderia sediminicola</i> | RL17-328-BIB-A | 2017-02-25      | temperate Coniferous Forest [ENVO:01000211] | rhizosphere environment [ENVO:01000999] | plant matter [ENVO:01001121] | Canada: British Columbia | 49.62 N 123.19 W       |
| 4   | 1-B5        | <i>Paraburkholderia sediminicola</i> | RL17-333-BID-A | 2017-02-25      | temperate Coniferous Forest [ENVO:01000211] | rhizosphere environment [ENVO:01000999] | plant matter [ENVO:01001121] | Canada: British Columbia | 49.42 N 123.49 W       |
| 5   | 1-B9        | <i>Paraburkholderia diworthii</i>    | RL17-335-BIF-A | 2017-02-25      | temperate Coniferous Forest [ENVO:01000211] | rhizosphere environment [ENVO:01000999] | plant matter [ENVO:01001121] | Canada: British Columbia | 49.42 N 123.49 W       |
| 6   | 1-C2        | <i>Paraburkholderia sediminicola</i> | RL17-337-BIC-A | 2017-02-25      | temperate Coniferous Forest [ENVO:01000211] | rhizosphere environment [ENVO:01000999] | plant matter [ENVO:01001121] | Canada: British Columbia | 49.42 N 123.49 W       |
| 7   | 1-C4        | <i>Paraburkholderia xenovorans</i>   | RL17-337-BIC-C | 2017-02-25      | temperate Coniferous Forest [ENVO:01000211] | rhizosphere environment [ENVO:01000999] | plant matter [ENVO:01001121] | Canada: British Columbia | 49.42 N 123.49 W       |
| 8   | 1-C8        | <i>Paraburkholderia sediminicola</i> | RL17-338-BIB-A | 2017-02-25      | temperate Coniferous Forest [ENVO:01000211] | rhizosphere environment [ENVO:01000999] | plant matter [ENVO:01001121] | Canada: British Columbia | 49.42 N 123.49 W       |



|    |      |                                        |                |            |                                             |                                         |                              |                          |                  |
|----|------|----------------------------------------|----------------|------------|---------------------------------------------|-----------------------------------------|------------------------------|--------------------------|------------------|
| 9  | 1-C9 | <i>Paraburkholderia sediminicola</i>   | RL17-333-BIE-B | 2017-02-25 | temperate Coniferous Forest [ENVO:01000211] | rhizosphere environment [ENVO:01000999] | plant matter [ENVO:01001121] | Canada: British Columbia | 49.42 N 123.49 W |
| 10 | 1-D2 | <i>Paraburkholderia sediminicola</i>   | RL17-336-BIC-B | 2017-02-25 | temperate Coniferous Forest [ENVO:01000211] | rhizosphere environment [ENVO:01000999] | plant matter [ENVO:01001121] | Canada: British Columbia | 49.42 N 123.49 W |
| 11 | 1-D4 | <i>Paraburkholderia metrosideri</i>    | RL17-338-BIC-A | 2017-02-25 | temperate Coniferous Forest [ENVO:01000211] | rhizosphere environment [ENVO:01000999] | plant matter [ENVO:01001121] | Canada: British Columbia | 49.42 N 123.49 W |
| 12 | 1-D9 | <i>Paraburkholderia bryophila</i>      | RL17-338-BIF-C | 2017-02-25 | temperate Coniferous Forest [ENVO:01000211] | rhizosphere environment [ENVO:01000999] | plant matter [ENVO:01001121] | Canada: British Columbia | 49.42 N 123.49 W |
| 13 | 1-E8 | <i>Paraburkholderia sediminicola</i>   | RL17-340-BIC-B | 2017-02-25 | temperate Coniferous Forest [ENVO:01000211] | rhizosphere environment [ENVO:01000999] | plant matter [ENVO:01001121] | Canada: British Columbia | 49.42 N 123.49 W |
| 14 | 1-F6 | <i>Paraburkholderia strydomiana</i>    | RL17-350-BID-A | 2017-02-26 | temperate Coniferous Forest [ENVO:01000211] | rhizosphere environment [ENVO:01000999] | plant matter [ENVO:01001121] | Canada: British Columbia | 49.16 N 123.96 W |
| 15 | 1-G7 | <i>Paraburkholderia strydomiana</i>    | RL17-347-BIE-B | 2017-02-26 | temperate Coniferous Forest [ENVO:01000211] | rhizosphere environment [ENVO:01000999] | plant matter [ENVO:01001121] | Canada: British Columbia | 49.17 N 123.96 W |
| 16 | 1-G8 | <i>Paraburkholderia phytofirmans</i>   | RL17-350-BIB-A | 2017-02-26 | temperate Coniferous Forest [ENVO:01000211] | rhizosphere environment [ENVO:01000999] | plant matter [ENVO:01001121] | Canada: British Columbia | 49.16 N 123.96 W |
| 17 | 1-G9 | <i>Paraburkholderia strydomiana</i>    | RL17-350-BIC-E | 2017-02-26 | temperate Coniferous Forest [ENVO:01000211] | rhizosphere environment [ENVO:01000999] | plant matter [ENVO:01001121] | Canada: British Columbia | 49.16 N 123.96 W |
| 18 | 1-H5 | <i>Paraburkholderia strydomiana</i>    | RL17-350-BIF-D | 2017-02-26 | temperate Coniferous Forest [ENVO:01000211] | rhizosphere environment [ENVO:01000999] | plant matter [ENVO:01001121] | Canada: British Columbia | 49.16 N 123.96 W |
| 19 | 1-I1 | <i>Paraburkholderia strydomiana</i>    | RL17-351-BIC-C | 2017-02-26 | temperate Coniferous Forest [ENVO:01000211] | rhizosphere environment [ENVO:01000999] | plant matter [ENVO:01001121] | Canada: British Columbia | 49.16 N 123.96 W |
| 20 | 1-I2 | <i>Paraburkholderia strydomiana</i>    | RL17-351-BIC-D | 2017-02-26 | temperate Coniferous Forest [ENVO:01000211] | rhizosphere environment [ENVO:01000999] | plant matter [ENVO:01001121] | Canada: British Columbia | 49.16 N 123.96 W |
| 21 | 2-B1 | <i>Paraburkholderia graminis</i>       | RL17-355-BIE-A | 2017-02-27 | temperate Coniferous Forest [ENVO:01000211] | rhizosphere environment [ENVO:01000999] | plant matter [ENVO:01001121] | Canada: British Columbia | 48.64 N 123.65 W |
| 22 | 2-C4 | <i>Paraburkholderia sp.</i>            | RL17-368-BIF-A | 2017-08-06 | temperate Coniferous Forest [ENVO:01000211] | rhizosphere environment [ENVO:01000999] | plant matter [ENVO:01001121] | Canada: British Columbia | 54.50 N 128.71 W |
| 23 | 2-C5 | <i>Paraburkholderia caffeinilytica</i> | RL17-332-BIF-A | 2017-02-25 | temperate Coniferous Forest [ENVO:01000211] | rhizosphere environment [ENVO:01000999] | plant matter [ENVO:01001121] | Canada: British Columbia | 49.42 N 123.49 W |
| 24 | 2-C6 | <i>Paraburkholderia sediminicola</i>   | RL17-333-BIC-A | 2017-02-25 | temperate Coniferous Forest [ENVO:01000211] | rhizosphere environment [ENVO:01000999] | plant matter [ENVO:01001121] | Canada: British Columbia | 49.42 N 123.49 W |
| 25 | 2-D3 | <i>Paraburkholderia graminis</i>       | RL17-368-BIF-C | 2017-08-06 | temperate Coniferous Forest [ENVO:01000211] | rhizosphere environment [ENVO:01000999] | plant matter [ENVO:01001121] | Canada: British Columbia | 54.50 N 128.71 W |
| 26 | 2-D4 | <i>Paraburkholderia graminis</i>       | RL17-369-BIB-A | 2017-08-06 | temperate Coniferous Forest [ENVO:01000211] | rhizosphere environment [ENVO:01000999] | plant matter [ENVO:01001121] | Canada: British Columbia | 54.50 N 128.71 W |
| 27 | 2-D9 | <i>Paraburkholderia strydomiana</i>    | RL17-353-BIB-A | 2017-02-26 | temperate Coniferous Forest [ENVO:01000211] | rhizosphere environment [ENVO:01000999] | plant matter [ENVO:01001121] | Canada: British Columbia | 49.16 N 123.96 W |
| 28 | 2-E2 | <i>Paraburkholderia sediminicola</i>   | RL17-357-BIB-A | 2017-02-27 | temperate Coniferous Forest [ENVO:01000211] | rhizosphere environment [ENVO:01000999] | plant matter [ENVO:01001121] | Canada: British Columbia | 48.64 N 123.65 W |
| 29 | 2-E4 | <i>Paraburkholderia caledonica</i>     | RL17-369-BIB-B | 2017-08-06 | temperate Coniferous Forest [ENVO:01000211] | rhizosphere environment [ENVO:01000999] | plant matter [ENVO:01001121] | Canada: British Columbia | 54.50 N 128.71 W |
| 30 | 2-E7 | <i>Paraburkholderia caledonica</i>     | RL17-371-BIF-A | 2017-08-06 | temperate Coniferous Forest [ENVO:01000211] | rhizosphere environment [ENVO:01000999] | plant matter [ENVO:01001121] | Canada: British Columbia | 54.50 N 128.71 W |
| 31 | 2-F1 | <i>Paraburkholderia strydomiana</i>    | RL17-373-BIB-B | 2017-08-06 | temperate Coniferous Forest [ENVO:01000211] | rhizosphere environment [ENVO:01000999] | plant matter [ENVO:01001121] | Canada: British Columbia | 54.50 N 128.71 W |
| 32 | 2-F2 | <i>Paraburkholderia strydomiana</i>    | RL17-373-BIB-D | 2017-08-06 | temperate Coniferous Forest [ENVO:01000211] | rhizosphere environment [ENVO:01000999] | plant matter [ENVO:01001121] | Canada: British Columbia | 54.50 N 128.71 W |
| 33 | 2-F3 | <i>Paraburkholderia sp.</i>            | RL17-373-BIF-A | 2017-08-06 | temperate Coniferous Forest [ENVO:01000211] | rhizosphere environment [ENVO:01000999] | plant matter [ENVO:01001121] | Canada: British Columbia | 54.50 N 128.71 W |
| 34 | 2-F4 | <i>Paraburkholderia strydomiana</i>    | RL17-373-BIF-C | 2017-08-06 | temperate Coniferous Forest [ENVO:01000211] | rhizosphere environment [ENVO:01000999] | plant matter [ENVO:01001121] | Canada: British Columbia | 54.50 N 128.71 W |

|    |      |                                         |                |            |                                             |                                         |                              |                          |                  |
|----|------|-----------------------------------------|----------------|------------|---------------------------------------------|-----------------------------------------|------------------------------|--------------------------|------------------|
| 35 | 2-F8 | <i>Caballeronia jiangsuensis</i>        | RL17-374-BIF-D | 2017-08-06 | temperate Coniferous Forest [ENVO:01000211] | rhizosphere environment [ENVO:01000999] | plant matter [ENVO:01001121] | Canada: British Columbia | 54.50 N 128.71 W |
| 36 | 2-F9 | <i>Paraburkholderia sedimicola</i>      | RL17-376-BIF-A | 2017-07-22 | temperate Coniferous Forest [ENVO:01000211] | rhizosphere environment [ENVO:01000999] | plant matter [ENVO:01001121] | Canada: British Columbia | 49.38 N 121.93 W |
| 37 | 2-G2 | <i>Paraburkholderia aspalathi</i>       | RL17-376-BIF-C | 2017-07-22 | temperate Coniferous Forest [ENVO:01000211] | rhizosphere environment [ENVO:01000999] | plant matter [ENVO:01001121] | Canada: British Columbia | 49.38 N 121.93 W |
| 38 | 2-G4 | <i>Paraburkholderia strydomiana</i>     | RL17-378-BIB-A | 2017-07-22 | temperate Coniferous Forest [ENVO:01000211] | rhizosphere environment [ENVO:01000999] | plant matter [ENVO:01001121] | Canada: British Columbia | 49.38 N 121.94 W |
| 39 | 2-G5 | <i>Paraburkholderia strydomiana</i>     | RL17-378-BIF-A | 2017-07-22 | temperate Coniferous Forest [ENVO:01000211] | rhizosphere environment [ENVO:01000999] | plant matter [ENVO:01001121] | Canada: British Columbia | 49.38 N 121.94 W |
| 40 | 2-G6 | <i>Paraburkholderia dipogonis</i>       | RL17-378-BIF-B | 2017-07-22 | temperate Coniferous Forest [ENVO:01000211] | rhizosphere environment [ENVO:01000999] | plant matter [ENVO:01001121] | Canada: British Columbia | 49.38 N 121.94 W |
| 41 | 2-G7 | <i>Paraburkholderia nemoris</i>         | RL17-379-BIB-A | 2017-07-22 | temperate Coniferous Forest [ENVO:01000211] | rhizosphere environment [ENVO:01000999] | plant matter [ENVO:01001121] | Canada: British Columbia | 49.38 N 121.94 W |
| 42 | 2-G8 | <i>Paraburkholderia strydomiana</i>     | RL17-379-BIB-C | 2017-07-22 | temperate Coniferous Forest [ENVO:01000211] | rhizosphere environment [ENVO:01000999] | plant matter [ENVO:01001121] | Canada: British Columbia | 49.38 N 121.94 W |
| 43 | 2-G9 | <i>Paraburkholderia aspalathi</i>       | RL17-379-BIF-A | 2017-07-22 | temperate Coniferous Forest [ENVO:01000211] | rhizosphere environment [ENVO:01000999] | plant matter [ENVO:01001121] | Canada: British Columbia | 49.38 N 121.94 W |
| 44 | 2-H1 | <i>Paraburkholderia phytofirmans</i>    | RL17-379-BIF-B | 2017-07-22 | temperate Coniferous Forest [ENVO:01000211] | rhizosphere environment [ENVO:01000999] | plant matter [ENVO:01001121] | Canada: British Columbia | 49.38 N 121.94 W |
| 45 | 2-H2 | <i>Paraburkholderia nemoris</i>         | RL17-380-BIB-A | 2017-07-22 | temperate Coniferous Forest [ENVO:01000211] | rhizosphere environment [ENVO:01000999] | plant matter [ENVO:01001121] | Canada: British Columbia | 49.38 N 121.94 W |
| 46 | 2-H3 | <i>Paraburkholderia sp.</i>             | RL17-380-BIE-A | 2017-07-22 | temperate Coniferous Forest [ENVO:01000211] | rhizosphere environment [ENVO:01000999] | plant matter [ENVO:01001121] | Canada: British Columbia | 49.38 N 121.94 W |
| 47 | 2-H4 | <i>Paraburkholderia dipogonis</i>       | RL17-381-BIB-A | 2017-07-22 | temperate Coniferous Forest [ENVO:01000211] | rhizosphere environment [ENVO:01000999] | plant matter [ENVO:01001121] | Canada: British Columbia | 49.37 N 121.93 W |
| 48 | 2-H5 | <i>Paraburkholderia aromaticivorans</i> | RL17-381-BIB-B | 2017-07-22 | temperate Coniferous Forest [ENVO:01000211] | rhizosphere environment [ENVO:01000999] | plant matter [ENVO:01001121] | Canada: British Columbia | 49.37 N 121.93 W |
| 49 | 2-H8 | <i>Paraburkholderia sp.</i>             | RL17-383-BIF-A | 2017-07-22 | temperate Coniferous Forest [ENVO:01000211] | rhizosphere environment [ENVO:01000999] | plant matter [ENVO:01001121] | Canada: British Columbia | 49.35 N 121.90 W |
| 50 | 2-H9 | <i>Paraburkholderia caledonica</i>      | RL17-383-BIF-B | 2017-07-22 | temperate Coniferous Forest [ENVO:01000211] | rhizosphere environment [ENVO:01000999] | plant matter [ENVO:01001121] | Canada: British Columbia | 49.35 N 121.90 W |
| 51 | 2-I1 | <i>Caballeronia grimmiae</i>            | RL17-374-BIB-E | 2017-08-06 | temperate Coniferous Forest [ENVO:01000211] | rhizosphere environment [ENVO:01000999] | plant matter [ENVO:01001121] | Canada: British Columbia | 54.50 N 128.71 W |
| 52 | 2-I2 | <i>Paraburkholderia strydomiana</i>     | RL17-376-BIB-A | 2017-07-22 | temperate Coniferous Forest [ENVO:01000211] | rhizosphere environment [ENVO:01000999] | plant matter [ENVO:01001121] | Canada: British Columbia | 49.38 N 121.93 W |
| 53 | 2-I6 | <i>Paraburkholderia strydomiana</i>     | RL17-379-BIB-D | 2017-07-22 | temperate Coniferous Forest [ENVO:01000211] | rhizosphere environment [ENVO:01000999] | plant matter [ENVO:01001121] | Canada: British Columbia | 49.38 N 121.93 W |
| 54 | 2-I8 | <i>Paraburkholderia sp.</i>             | RL17-347-BIC-D | 2017-02-26 | temperate Coniferous Forest [ENVO:01000211] | rhizosphere environment [ENVO:01000999] | plant matter [ENVO:01001121] | Canada: British Columbia | 49.17 N 123.96 W |
| 55 | 2-I9 | <i>Paraburkholderia phytofirmans</i>    | RL17-351-BIE-A | 2017-02-26 | temperate Coniferous Forest [ENVO:01000211] | rhizosphere environment [ENVO:01000999] | plant matter [ENVO:01001121] | Canada: British Columbia | 49.16 N 123.96 W |
| 56 | 3-A2 | <i>Paraburkholderia strydomiana</i>     | RL17-378-BIB-B | 2017-07-22 | temperate Coniferous Forest [ENVO:01000211] | rhizosphere environment [ENVO:01000999] | plant matter [ENVO:01001121] | Canada: British Columbia | 49.38 N 121.94 W |
| 57 | 3-A6 | <i>Paraburkholderia nemoris</i>         | RL17-376-BIF-D | 2017-07-22 | temperate Coniferous Forest [ENVO:01000211] | rhizosphere environment [ENVO:01000999] | plant matter [ENVO:01001121] | Canada: British Columbia | 49.38 N 121.93 W |
| 58 | 3-B1 | <i>Paraburkholderia sedimicola</i>      | RL18-035-BIC-A | 2018-04-09 | temperate Coniferous Forest [ENVO:01000211] | rhizosphere environment [ENVO:01000999] | plant matter [ENVO:01001121] | Canada: British Columbia | 49.38 N 121.94 W |
| 59 | 3-B2 | <i>Paraburkholderia sedimicola</i>      | RL18-035-BIE-A | 2018-04-09 | temperate Coniferous Forest [ENVO:01000211] | rhizosphere environment [ENVO:01000999] | plant matter [ENVO:01001121] | Canada: British Columbia | 49.38 N 121.94 W |
| 60 | 3-B5 | <i>Paraburkholderia sedimicola</i>      | RL18-007-BIE-A | 2018-04-09 | temperate Coniferous Forest [ENVO:01000211] | rhizosphere environment [ENVO:01000999] | plant matter [ENVO:01001121] | Canada: British Columbia | 49.38 N 121.94 W |

|    |      |                                      |                |            |                                             |                                         |                              |                          |                  |
|----|------|--------------------------------------|----------------|------------|---------------------------------------------|-----------------------------------------|------------------------------|--------------------------|------------------|
| 61 | 3-A9 | <i>Paraburkholderia rhynchosiae</i>  | RL18-126-BIB-B | 2018-08-15 | temperate Coniferous Forest [ENVO:01000211] | rhizosphere environment [ENVO:01000999] | plant matter [ENVO:01001121] | Canada: British Columbia | 49.33 N 124.92 W |
| 62 | 3-B6 | <i>Paraburkholderia nemoris</i>      | RL18-009-BIC-B | 2018-04-09 | temperate Coniferous Forest [ENVO:01000211] | rhizosphere environment [ENVO:01000999] | plant matter [ENVO:01001121] | Canada: British Columbia | 49.38 N 121.94 W |
| 63 | 3-B9 | <i>Paraburkholderia sediminicola</i> | RL18-021-BIF-A | 2018-04-09 | temperate Coniferous Forest [ENVO:01000211] | rhizosphere environment [ENVO:01000999] | plant matter [ENVO:01001121] | Canada: British Columbia | 49.38 N 121.94 W |
| 64 | 3-C2 | <i>Paraburkholderia sediminicola</i> | RL18-056-BIE-A | 2018-08-14 | temperate Coniferous Forest [ENVO:01000211] | rhizosphere environment [ENVO:01000999] | plant matter [ENVO:01001121] | Canada: British Columbia | 49.25 N 124.79 W |
| 65 | 3-C4 | <i>Paraburkholderia nemoris</i>      | RL18-011-BIC-A | 2018-04-09 | temperate Coniferous Forest [ENVO:01000211] | rhizosphere environment [ENVO:01000999] | plant matter [ENVO:01001121] | Canada: British Columbia | 49.38 N 121.94 W |
| 66 | 3-C5 | <i>Paraburkholderia sediminicola</i> | RL18-012-BIE-A | 2018-04-09 | temperate Coniferous Forest [ENVO:01000211] | rhizosphere environment [ENVO:01000999] | plant matter [ENVO:01001121] | Canada: British Columbia | 49.38 N 121.94 W |
| 67 | 3-C8 | <i>Paraburkholderia sediminicola</i> | RL18-081-BIC-C | 2018-08-14 | temperate Coniferous Forest [ENVO:01000211] | rhizosphere environment [ENVO:01000999] | plant matter [ENVO:01001121] | Canada: British Columbia | 49.21 N 124.79 W |
| 68 | 3-D3 | <i>Paraburkholderia nemoris</i>      | RL18-043-BIE-A | 2018-04-09 | temperate Coniferous Forest [ENVO:01000211] | rhizosphere environment [ENVO:01000999] | plant matter [ENVO:01001121] | Canada: British Columbia | 49.38 N 121.94 W |
| 69 | 3-D4 | <i>Paraburkholderia sediminicola</i> | RL18-082-BIB-A | 2018-08-14 | temperate Coniferous Forest [ENVO:01000211] | rhizosphere environment [ENVO:01000999] | plant matter [ENVO:01001121] | Canada: British Columbia | 49.25 N 124.86 W |
| 70 | 3-D5 | <i>Paraburkholderia fungorum</i>     | RL18-106-BIC-A | 2018-08-15 | temperate Coniferous Forest [ENVO:01000211] | rhizosphere environment [ENVO:01000999] | plant matter [ENVO:01001121] | Canada: British Columbia | 49.29 N 124.91 W |
| 71 | 3-D6 | <i>Paraburkholderia dipogonis</i>    | RL18-106-BIC-C | 2018-08-15 | temperate Coniferous Forest [ENVO:01000211] | rhizosphere environment [ENVO:01000999] | plant matter [ENVO:01001121] | Canada: British Columbia | 49.29 N 124.91 W |
| 72 | 3-D7 | <i>Paraburkholderia sediminicola</i> | RL18-106-BID-A | 2018-08-15 | temperate Coniferous Forest [ENVO:01000211] | rhizosphere environment [ENVO:01000999] | plant matter [ENVO:01001121] | Canada: British Columbia | 49.29 N 124.91 W |
| 73 | 3-E1 | <i>Paraburkholderia aspalathi</i>    | RL18-012-BIC-A | 2018-04-09 | temperate Coniferous Forest [ENVO:01000211] | rhizosphere environment [ENVO:01000999] | plant matter [ENVO:01001121] | Canada: British Columbia | 49.38 N 121.94 W |
| 74 | 3-E2 | <i>Paraburkholderia sediminicola</i> | RL18-014-BIF-A | 2018-04-09 | temperate Coniferous Forest [ENVO:01000211] | rhizosphere environment [ENVO:01000999] | plant matter [ENVO:01001121] | Canada: British Columbia | 49.38 N 121.94 W |
| 75 | 3-E8 | <i>Paraburkholderia sediminicola</i> | RL18-017-BIF-B | 2018-04-09 | temperate Coniferous Forest [ENVO:01000211] | rhizosphere environment [ENVO:01000999] | plant matter [ENVO:01001121] | Canada: British Columbia | 49.38 N 121.94 W |
| 76 | 3-E9 | <i>Paraburkholderia megapolitana</i> | RL18-039-BIC-B | 2018-04-09 | temperate Coniferous Forest [ENVO:01000211] | rhizosphere environment [ENVO:01000999] | plant matter [ENVO:01001121] | Canada: British Columbia | 49.38 N 121.94 W |
| 77 | 3-F3 | <i>Paraburkholderia aspalathi</i>    | RL18-139-BIC-B | 2018-08-15 | temperate Coniferous Forest [ENVO:01000211] | rhizosphere environment [ENVO:01000999] | plant matter [ENVO:01001121] | Canada: British Columbia | 49.24 N 125.36 W |
| 78 | 3-F6 | <i>Paraburkholderia fungorum</i>     | RL18-167-BIC-A | 2018-08-16 | temperate Coniferous Forest [ENVO:01000211] | rhizosphere environment [ENVO:01000999] | plant matter [ENVO:01001121] | Canada: British Columbia | 48.94 N 125.56 W |
| 79 | 3-F7 | <i>Caballeronia glebae</i>           | RL18-006-BIC-A | 2018-04-09 | temperate Coniferous Forest [ENVO:01000211] | rhizosphere environment [ENVO:01000999] | plant matter [ENVO:01001121] | Canada: British Columbia | 49.38 N 121.94 W |
| 80 | 3-F9 | <i>Paraburkholderia sediminicola</i> | RL18-106-BIB-A | 2018-08-15 | temperate Coniferous Forest [ENVO:01000211] | rhizosphere environment [ENVO:01000999] | plant matter [ENVO:01001121] | Canada: British Columbia | 49.29 N 124.91 W |
| 81 | 3-G1 | <i>Paraburkholderia sediminicola</i> | RL18-114-BIF-A | 2018-08-15 | temperate Coniferous Forest [ENVO:01000211] | rhizosphere environment [ENVO:01000999] | plant matter [ENVO:01001121] | Canada: British Columbia | 49.92 N 124.92 W |
| 82 | 3-G5 | <i>Paraburkholderia sp.</i>          | RL18-085-BIA-A | 2018-08-14 | temperate Coniferous Forest [ENVO:01000211] | rhizosphere environment [ENVO:01000999] | plant matter [ENVO:01001121] | Canada: British Columbia | 49.21 N 124.79 W |
| 83 | 3-G9 | <i>Paraburkholderia sp.</i>          | RL18-101-BIB-B | 2018-08-14 | temperate Coniferous Forest [ENVO:01000211] | rhizosphere environment [ENVO:01000999] | plant matter [ENVO:01001121] | Canada: British Columbia | 49.24 N 124.94 W |
| 84 | 3-H1 | <i>Paraburkholderia aspalathi</i>    | RL18-101-BIC-A | 2018-08-14 | temperate Coniferous Forest [ENVO:01000211] | rhizosphere environment [ENVO:01000999] | plant matter [ENVO:01001121] | Canada: British Columbia | 49.24 N 124.94 W |
| 85 | 3-H3 | <i>Paraburkholderia sediminicola</i> | RL18-154-BIB-A | 2018-08-15 | temperate Coniferous Forest [ENVO:01000211] | rhizosphere environment [ENVO:01000999] | plant matter [ENVO:01001121] | Canada: British Columbia | 49.24 N 125.36 W |
| 86 | 3-H5 | <i>Paraburkholderia sediminicola</i> | RL18-079-BIE-A | 2018-08-14 | temperate Coniferous Forest [ENVO:01000211] | rhizosphere environment [ENVO:01000999] | plant matter [ENVO:01001121] | Canada: British Columbia | 49.26 N 124.73 W |

|     |      |                                      |                |            |                                             |                                         |                              |                          |                  |
|-----|------|--------------------------------------|----------------|------------|---------------------------------------------|-----------------------------------------|------------------------------|--------------------------|------------------|
| 87  | 3-H6 | <i>Paraburkholderia sediminicola</i> | RL18-120-BIB-A | 2018-08-15 | temperate Coniferous Forest [ENVO:01000211] | rhizosphere environment [ENVO:01000999] | plant matter [ENVO:01001121] | Canada: British Columbia | 49.34 N 124.92 W |
| 88  | 3-H8 | <i>Paraburkholderia sediminicola</i> | RL18-126-BIB-A | 2018-08-15 | temperate Coniferous Forest [ENVO:01000211] | rhizosphere environment [ENVO:01000999] | plant matter [ENVO:01001121] | Canada: British Columbia | 49.33 N 124.92 W |
| 89  | 3-I1 | <i>Paraburkholderia aspalathi</i>    | RL18-045-BIB-A | 2018-04-09 | temperate Coniferous Forest [ENVO:01000211] | rhizosphere environment [ENVO:01000999] | plant matter [ENVO:01001121] | Canada: British Columbia | 49.38 N 121.94 W |
| 90  | 3-I5 | <i>Paraburkholderia sediminicola</i> | RL18-085-BIF-A | 2018-08-14 | temperate Coniferous Forest [ENVO:01000211] | rhizosphere environment [ENVO:01000999] | plant matter [ENVO:01001121] | Canada: British Columbia | 49.21 N 124.79 W |
| 91  | 1-B6 | <i>Paraburkholderia sediminicola</i> | RL17-333-BIE-A | 2017-02-25 | temperate Coniferous Forest [ENVO:01000211] | rhizosphere environment [ENVO:01000999] | plant matter [ENVO:01001121] | Canada: British Columbia | 49.42 N 123.49 W |
| 92  | 1-F8 | <i>Paraburkholderia sediminicola</i> | RL17-342-BIF-A | 2017-02-25 | temperate Coniferous Forest [ENVO:01000211] | rhizosphere environment [ENVO:01000999] | plant matter [ENVO:01001121] | Canada: British Columbia | 49.42 N 123.49 W |
| 93  | 1-G3 | <i>Paraburkholderia dipogonis</i>    | RL17-350-BIC-A | 2017-02-26 | temperate Coniferous Forest [ENVO:01000211] | rhizosphere environment [ENVO:01000999] | plant matter [ENVO:01001121] | Canada: British Columbia | 49.16 N 123.96 W |
| 94  | 1-H1 | <i>Paraburkholderia azotifigens</i>  | RL17-350-BID-B | 2017-02-26 | temperate Coniferous Forest [ENVO:01000211] | rhizosphere environment [ENVO:01000999] | plant matter [ENVO:01001121] | Canada: British Columbia | 49.16 N 123.96 W |
| 95  | 2-E6 | <i>Paraburkholderia strydomiana</i>  | RL17-368-BIB-B | 2017-08-06 | temperate Coniferous Forest [ENVO:01000211] | rhizosphere environment [ENVO:01000999] | plant matter [ENVO:01001121] | Canada: British Columbia | 54.50 N 128.71 W |
| 96  | 2-E8 | <i>Caballeronia grimmiae</i>         | RL17-372-BIF-A | 2017-08-06 | temperate Coniferous Forest [ENVO:01000211] | rhizosphere environment [ENVO:01000999] | plant matter [ENVO:01001121] | Canada: British Columbia | 54.50 N 128.71 W |
| 97  | 2-E9 | <i>Paraburkholderia graminis</i>     | RL17-372-BIF-C | 2017-08-06 | temperate Coniferous Forest [ENVO:01000211] | rhizosphere environment [ENVO:01000999] | plant matter [ENVO:01001121] | Canada: British Columbia | 54.50 N 128.71 W |
| 98  | 2-G3 | <i>Paraburkholderia phytofirmans</i> | RL17-377-BIF-A | 2017-07-22 | temperate Coniferous Forest [ENVO:01000211] | rhizosphere environment [ENVO:01000999] | plant matter [ENVO:01001121] | Canada: British Columbia | 49.38 N 121.94 W |
| 99  | 2-H6 | <i>Paraburkholderia sp.</i>          | RL17-381-BIF-C | 2017-07-22 | temperate Coniferous Forest [ENVO:01000211] | rhizosphere environment [ENVO:01000999] | plant matter [ENVO:01001121] | Canada: British Columbia | 49.37 N 121.93 W |
| 100 | 3-A1 | <i>Paraburkholderia graminis</i>     | RL17-369-BIF-A | 2017-08-06 | temperate Coniferous Forest [ENVO:01000211] | rhizosphere environment [ENVO:01000999] | plant matter [ENVO:01001121] | Canada: British Columbia | 54.50 N 128.71 W |
| 101 | 3-D2 | <i>Paraburkholderia nemoris</i>      | RL18-043-BID-A | 2018-04-09 | temperate Coniferous Forest [ENVO:01000211] | rhizosphere environment [ENVO:01000999] | plant matter [ENVO:01001121] | Canada: British Columbia | 49.38 N 121.94 W |
| 102 | 1-C1 | <i>Paraburkholderia agricolaris</i>  | RL17-342-BIF-B | 2017-02-25 | temperate Coniferous Forest [ENVO:01000211] | rhizosphere environment [ENVO:01000999] | plant matter [ENVO:01001121] | Canada: British Columbia | 49.42 N 123.49 W |
| 103 | 1-D8 | <i>Paraburkholderia acidicola</i>    | RL17-338-BIF-B | 2021-03-25 | temperate Coniferous Forest [ENVO:01000211] | rhizosphere environment [ENVO:01000999] | plant matter [ENVO:01001121] | Canada: British Columbia | 49.42 N 123.49 W |
| 104 | 3-C1 | <i>Paraburkholderia acidicola</i>    | RL18-030-BIB-A | 2018-04-09 | temperate Coniferous Forest [ENVO:01000211] | rhizosphere environment [ENVO:01000999] | plant matter [ENVO:01001121] | Canada: British Columbia | 49.38 N 121.94 W |
| 105 | 3-E3 | <i>Paraburkholderia fungorum</i>     | RL18-015-BIC-B | 2018-04-09 | temperate Coniferous Forest [ENVO:01000211] | rhizosphere environment [ENVO:01000999] | plant matter [ENVO:01001121] | Canada: British Columbia | 49.38 N 121.94 W |
| 106 | 4-F6 | <i>Paraburkholderia madseniana</i>   | RL19-001-BIB-A | 2019-03-26 | temperate Coniferous Forest [ENVO:01000211] | rhizosphere environment [ENVO:01000999] | plant matter [ENVO:01001121] | Canada: British Columbia | 49.30 N 122.71 W |
| 107 | 4-H5 | <i>Paraburkholderia agricolaris</i>  | RL19-015-BID-A | 2019-03-26 | temperate Coniferous Forest [ENVO:01000211] | rhizosphere environment [ENVO:01000999] | plant matter [ENVO:01001121] | Canada: British Columbia | 49.30 N 122.70 W |
| 108 | 5-A2 | <i>Paraburkholderia fungorum</i>     | RL21-008-BIB-A | 2021-03-25 | temperate Coniferous Forest [ENVO:01000211] | rhizosphere environment [ENVO:01000999] | plant matter [ENVO:01001121] | Canada: British Columbia | 49.36 N 123.26 W |
| 109 | 5-A3 | <i>Herbaspirillum lusitanum</i>      | RL16-012-BIC-B | 2016-08-24 | temperate Coniferous Forest [ENVO:01000211] | rhizosphere environment [ENVO:01000999] | plant matter [ENVO:01001121] | Canada: British Columbia | 49.26 N 122.95 W |
| 110 | 5-A5 | <i>Paraburkholderia agricolaris</i>  | RL17-336-BIC-C | 2017-02-25 | temperate Coniferous Forest [ENVO:01000211] | rhizosphere environment [ENVO:01000999] | plant matter [ENVO:01001121] | Canada: British Columbia | 49.42 N 123.49 W |
| 111 | 5-A6 | <i>Paraburkholderia fungorum</i>     | RL17-337-BIB-A | 2017-02-25 | temperate Coniferous Forest [ENVO:01000211] | rhizosphere environment [ENVO:01000999] | plant matter [ENVO:01001121] | Canada: British Columbia | 49.42 N 123.49 W |
| 112 | 5-A7 | <i>Paraburkholderia sp.</i>          | RL17-339-BIF-C | 2017-02-25 | temperate Coniferous Forest [ENVO:01000211] | rhizosphere environment [ENVO:01000999] | plant matter [ENVO:01001121] | Canada: British Columbia | 49.42 N 123.49 W |

|            |      |                                      |                |            |                                             |                                         |                              |                          |                  |
|------------|------|--------------------------------------|----------------|------------|---------------------------------------------|-----------------------------------------|------------------------------|--------------------------|------------------|
| <b>113</b> | 5-A8 | <i>Paraburkholderia megapolitana</i> | RL17-342-BIB-A | 2017-02-25 | temperate Coniferous Forest [ENVO:01000211] | rhizosphere environment [ENVO:01000999] | plant matter [ENVO:01001121] | Canada: British Columbia | 49.42 N 123.49 W |
| <b>114</b> | 5-A9 | <i>Paraburkholderia madseniana</i>   | RL21-008-BIB-B | 2021-03-25 | temperate Coniferous Forest [ENVO:01000211] | rhizosphere environment [ENVO:01000999] | plant matter [ENVO:01001121] | Canada: British Columbia | 49.36 N 123.26 W |
| <b>115</b> | 5-B2 | <i>Herbaspirillum rhizosphaerae</i>  | RL18-103-BIB-C | 2018-08-14 | temperate Coniferous Forest [ENVO:01000211] | rhizosphere environment [ENVO:01000999] | plant matter [ENVO:01001121] | Canada: British Columbia | 49.21 N 124.79 W |

**Table S4. Contig summary for hybrid assemblies (Illumina and Nanopore).**

| <b><i>Paraburkholderia acidicola</i> RL17-338-BIF-B</b>    |                    |              |
|------------------------------------------------------------|--------------------|--------------|
| <b>Contig Number</b>                                       | <b>Length (bp)</b> | <b>Notes</b> |
| 1                                                          | 4521181            |              |
| 2                                                          | 2989334            | circular     |
| 3                                                          | 216655             |              |
| 4                                                          | 5238               |              |
| 5                                                          | 5179               |              |
| 6                                                          | 2905               |              |
| 7                                                          | 192                |              |
| 8                                                          | 191                |              |
| 9                                                          | 173                |              |
| 10                                                         | 142                |              |
| 11                                                         | 128                |              |
| <b><i>Paraburkholderia fungorum</i> RL18-167-BIC-A</b>     |                    |              |
| <b>Contig Number</b>                                       | <b>Length (bp)</b> | <b>Notes</b> |
| 1                                                          | 4603259            | circular     |
| 2                                                          | 3440274            |              |
| 3                                                          | 739317             |              |
| 4                                                          | 26249              | circular     |
| <b><i>Paraburkholderia megapolitana</i> RL18-039-BIC-B</b> |                    |              |
| <b>Contig Number</b>                                       | <b>Length (bp)</b> | <b>Notes</b> |
| 1                                                          | 4513754            | circular     |
| 2                                                          | 2988503            | circular     |
| <b><i>Paraburkholderia nemoris</i> RL18-043-BID-A</b>      |                    |              |
| <b>Contig Number</b>                                       | <b>Length (bp)</b> | <b>Notes</b> |
| 1                                                          | 4572990            | circular     |
| 2                                                          | 3886260            | circular     |
| 3                                                          | 493061             | circular     |
| <b><i>Paraburkholderia</i> sp. RL17-337-BIB-A</b>          |                    |              |
| <b>Contig Number</b>                                       | <b>Length (bp)</b> | <b>Notes</b> |
| 1                                                          | 4719104            |              |
| 2                                                          | 3808221            | circular     |
| 3                                                          | 1454917            | circular     |
| 4                                                          | 859067             | circular     |

**Table S5. Number of BGCs, genome size, and ratio of number of BGCs to genome size per strain and phylogenetic clade.**

| Genome | Strain ID | Species                                                | Clade* | Total # of BGCs | Genome Size (Mbp) | Ratio (# of BGCs per Mbp) | Ratio per Clade |
|--------|-----------|--------------------------------------------------------|--------|-----------------|-------------------|---------------------------|-----------------|
| 108    | 5-A2      | <i>Herbaspirillum lusitanum</i> RL21-008-BIB-A         | A      | 5               | 5.79              | 0.9                       | 0.75            |
| 114    | 5-A9      | <i>Herbaspirillum rhizosphaerae</i> RL21-008-BIB-B     | A      | 3               | 5.16              | 0.6                       |                 |
| 35     | 2-F8      | <i>Caballeronia jiangsuensis</i> RL17-374-BIF-D        | B      | 15              | 8.3               | 1.8                       | 1.3             |
| 51     | 2-I1      | <i>Caballeronia grimmiae</i> RL17-374-BIB-E            | B      | 6               | 7.29              | 0.8                       |                 |
| 79     | 3-F7      | <i>Caballeronia glebae</i> RL18-006-BIC-A              | B      | 11              | 7.94              | 1.4                       |                 |
| 96     | 2-E8      | <i>Caballeronia grimmiae</i> RL17-372-BIF-A            | B      | 6               | 6.74              | 0.9                       |                 |
| 94     | 1-H1      | <i>Paraburkholderia azotifigens</i> RL17-350-BID-B     | C      | 14              | 8.71              | 1.6                       | 1.6             |
| 76     | 3-E9      | <i>Paraburkholderia megapolitana</i> RL18-039-BIC-B    | D      | 16              | 7.5               | 2.1                       | 2.1             |
| 103    | 1-D8      | <i>Paraburkholderia acidicola</i> RL17-338-BIF-B       | D      | 16              | 7.74              | 2.1                       |                 |
| 112    | 5-A7      | <i>Paraburkholderia megapolitana</i> RL17-339-BIF-C    | D      | 17              | 7.81              | 2.2                       |                 |
| 21     | 2-B1      | <i>Paraburkholderia graminis</i> RL17-355-BIE-A        | E      | 11              | 7.32              | 1.5                       | 1.4             |
| 22     | 2-C4      | <i>Paraburkholderia graminis</i> RL17-368-BIF-A        | E      | 10              | 9.3               | 1.1                       |                 |
| 25     | 2-D3      | <i>Paraburkholderia graminis</i> RL17-368-BIF-C        | E      | 12              | 7.84              | 1.5                       |                 |
| 26     | 2-D4      | <i>Paraburkholderia graminis</i> RL17-369-BIB-A        | E      | 11              | 7.51              | 1.5                       |                 |
| 97     | 2-E9      | <i>Paraburkholderia graminis</i> RL17-372-BIF-C        | E      | 11              | 7.48              | 1.5                       |                 |
| 100    | 3-A1      | <i>Paraburkholderia graminis</i> RL17-369-BIF-A        | E      | 11              | 7.52              | 1.5                       |                 |
| 14     | 1-F6      | <i>Paraburkholderia strydomiana</i> RL17-350-BID-A     | F      | 14              | 7.89              | 1.8                       | 1.3             |
| 18     | 1-H5      | <i>Paraburkholderia strydomiana</i> RL17-350-BIF-D     | F      | 10              | 7.16              | 1.4                       |                 |
| 19     | 1-I1      | <i>Paraburkholderia strydomiana</i> RL17-351-BIC-C     | F      | 11              | 7.64              | 1.4                       |                 |
| 20     | 1-I2      | <i>Paraburkholderia strydomiana</i> RL17-351-BIC-D     | F      | 11              | 7.37              | 1.5                       |                 |
| 27     | 2-D9      | <i>Paraburkholderia strydomiana</i> RL17-353-BIB-A     | F      | 11              | 7.17              | 1.5                       |                 |
| 29     | 2-E4      | <i>Paraburkholderia caledonica</i> RL17-369-BIB-B      | F      | 10              | 7.4               | 1.4                       |                 |
| 30     | 2-E7      | <i>Paraburkholderia caledonica</i> RL17-371-BIF-A      | F      | 10              | 7.28              | 1.4                       |                 |
| 31     | 2-F1      | <i>Paraburkholderia strydomiana</i> RL17-373-BIB-B     | F      | 9               | 7.34              | 1.2                       |                 |
| 32     | 2-F2      | <i>Paraburkholderia strydomiana</i> RL17-373-BIB-D     | F      | 9               | 7.39              | 1.2                       |                 |
| 34     | 2-F4      | <i>Paraburkholderia strydomiana</i> RL17-373-BIF-C     | F      | 10              | 7.5               | 1.3                       |                 |
| 38     | 2-G4      | <i>Paraburkholderia strydomiana</i> RL17-378-BIB-A     | F      | 9               | 8.07              | 1.1                       |                 |
| 39     | 2-G5      | <i>Paraburkholderia strydomiana</i> RL17-378-BIF-A     | F      | 11              | 7.29              | 1.5                       |                 |
| 42     | 2-G8      | <i>Paraburkholderia strydomiana</i> RL17-379-BIB-C     | F      | 9               | 7.8               | 1.2                       |                 |
| 50     | 2-H9      | <i>Paraburkholderia caledonica</i> RL17-383-BIF-B      | F      | 10              | 7.27              | 1.4                       |                 |
| 52     | 2-I2      | <i>Paraburkholderia strydomiana</i> RL17-376-BIB-A     | F      | 9               | 7.8               | 1.2                       |                 |
| 53     | 2-I6      | <i>Paraburkholderia strydomiana</i> RL17-379-BIB-D     | F      | 9               | 7.8               | 1.2                       |                 |
| 56     | 3-A2      | <i>Paraburkholderia strydomiana</i> RL17-378-BIB-B     | F      | 9               | 7.77              | 1.2                       |                 |
| 15     | 1-G7      | <i>Paraburkholderia strydomiana</i> RL17-347-BIE-B     | G      | 10              | 7.77              | 1.3                       |                 |
| 17     | 1-G9      | <i>Paraburkholderia strydomiana</i> RL17-350-BIC-E     | G      | 10              | 8.46              | 1.2                       |                 |
| 61     | 3-A9      | <i>Paraburkholderia rhynchosiae</i> RL18-126-BIB-B     | G      | 11              | 8.79              | 1.3                       |                 |
| 82     | 3-G5      | <i>Paraburkholderia</i> sp. RL18-085-BIA-A             | G      | 14              | 11.4              | 1.2                       |                 |
| 88     | 3-H8      | <i>Paraburkholderia sedimicola</i> RL18-126-BIB-A      | G      | 9               | 8.76              | 1.0                       |                 |
| 95     | 2-E6      | <i>Paraburkholderia strydomiana</i> RL17-368-BIB-B     | G      | 11              | 8.3               | 1.3                       |                 |
| 115    | 5-B2      | <i>Paraburkholderia</i> sp. RL18-103-BIB-C             | G      | 13              | 11.45             | 1.1                       |                 |
| 3      | 1-B2      | <i>Paraburkholderia sedimicola</i> RL17-328-BIB-A      | H      | 10              | 9.73              | 1.0                       | 1.2             |
| 5      | 1-B9      | <i>Paraburkholderia dilworthii</i> RL17-335-BIF-A      | H      | 14              | 8.21              | 1.7                       |                 |
| 7      | 1-C4      | <i>Paraburkholderia xenovorans</i> RL17-337-BIC-C      | H      | 10              | 9.72              | 1.0                       |                 |
| 12     | 1-D9      | <i>Paraburkholderia bryophila</i> RL17-338-BIF-C       | H      | 14              | 8.23              | 1.7                       |                 |
| 16     | 1-G8      | <i>Paraburkholderia phytofirmans</i> RL17-350-BIB-A    | H      | 10              | 7.7               | 1.3                       |                 |
| 33     | 2-F3      | <i>Paraburkholderia phytofirmans</i> RL17-373-BIF-A    | H      | 10              | 10.93             | 0.9                       |                 |
| 36     | 2-F9      | <i>Paraburkholderia phytofirmans</i> RL17-376-BIF-A    | H      | 11              | 10.12             | 1.1                       |                 |
| 40     | 2-G6      | <i>Paraburkholderia dipogonis</i> RL17-378-BIF-B       | H      | 14              | 8.65              | 1.6                       |                 |
| 44     | 2-H1      | <i>Paraburkholderia phytofirmans</i> RL17-379-BIF-B    | H      | 12              | 8.59              | 1.4                       |                 |
| 46     | 2-H3      | <i>Paraburkholderia</i> sp. RL17-380-BIE-A             | H      | 12              | 7.93              | 1.5                       |                 |
| 48     | 2-H5      | <i>Paraburkholderia aromaticivorans</i> RL17-381-BIB-B | H      | 14              | 8.81              | 1.6                       |                 |
| 49     | 2-H8      | <i>Paraburkholderia</i> sp. RL17-383-BIF-A             | H      | 12              | 8.05              | 1.5                       |                 |
| 54     | 2-I8      | <i>Paraburkholderia</i> sp. RL17-347-BIC-D             | H      | 8               | 10.6              | 0.8                       |                 |
| 55     | 2-I9      | <i>Paraburkholderia phytofirmans</i> RL17-351-BIE-A    | H      | 10              | 7.72              | 1.3                       |                 |
| 60     | 3-B5      | <i>Paraburkholderia sedimicola</i> RL18-007-BIE-A      | H      | 12              | 10.28             | 1.2                       |                 |
| 71     | 3-D6      | <i>Paraburkholderia dipogonis</i> RL18-106-BIC-C       | H      | 11              | 9.32              | 1.2                       |                 |
| 75     | 3-E8      | <i>Paraburkholderia sedimicola</i> RL18-017-BIF-B      | H      | 10              | 10.01             | 1.0                       |                 |
| 83     | 3-G9      | <i>Paraburkholderia</i> sp. RL18-101-BIB-B             | H      | 8               | 10.2              | 0.8                       |                 |
| 93     | 1-G3      | <i>Paraburkholderia dipogonis</i> RL17-350-BIC-A       | H      | 11              | 10.5              | 1.0                       |                 |
| 98     | 2-G3      | <i>Paraburkholderia phytofirmans</i> RL17-377-BIF-A    | H      | 11              | 8.52              | 1.3                       |                 |
| 99     | 2-H6      | <i>Paraburkholderia</i> sp. RL17-381-BIF-C             | H      | 13              | 8.19              | 1.6                       |                 |
| 1      | 1-A4      | <i>Paraburkholderia xenovorans</i> RL17-329-BIC-A      | I      | 11              | 7.64              | 1.4                       | 1.5             |
| 2      | 1-A6      | <i>Paraburkholderia nemoris</i> RL17-333-BIC-B         | I      | 17              | 9.23              | 1.8                       |                 |

|     |      |                                                       |   |    |       |     |
|-----|------|-------------------------------------------------------|---|----|-------|-----|
| 4   | 1-B5 | <i>Paraburkholderia sediminicola</i> RL17-333-BID-A   | I | 12 | 10.15 | 1.2 |
| 6   | 1-C2 | <i>Paraburkholderia sediminicola</i> RL17-337-BIC-A   | I | 13 | 8.57  | 1.5 |
| 8   | 1-C8 | <i>Paraburkholderia sediminicola</i> RL17-338-BIB-A   | I | 13 | 8.26  | 1.6 |
| 9   | 1-C9 | <i>Paraburkholderia sediminicola</i> RL17-333-BIE-B   | I | 13 | 10.62 | 1.2 |
| 10  | 1-D2 | <i>Paraburkholderia sediminicola</i> RL17-336-BIC-B   | I | 12 | 10.27 | 1.2 |
| 11  | 1-D4 | <i>Paraburkholderia metrosideri</i> RL17-338-BIC-A    | I | 14 | 8.78  | 1.6 |
| 13  | 1-E8 | <i>Paraburkholderia sediminicola</i> RL17-340-BIC-B   | I | 9  | 7.77  | 1.2 |
| 23  | 2-C5 | <i>Paraburkholderia caffeinolytica</i> RL17-332-BIF-A | I | 12 | 8.29  | 1.4 |
| 24  | 2-C6 | <i>Paraburkholderia sediminicola</i> RL17-333-BIC-A   | I | 13 | 10.24 | 1.3 |
| 28  | 2-E2 | <i>Paraburkholderia sediminicola</i> RL17-357-BIB-A   | I | 18 | 9.68  | 1.9 |
| 37  | 2-G2 | <i>Paraburkholderia aspalathi</i> RL17-376-BIF-C      | I | 13 | 8.41  | 1.5 |
| 41  | 2-G7 | <i>Paraburkholderia nemoris</i> RL17-379-BIF-A        | I | 15 | 8.59  | 1.7 |
| 43  | 2-G9 | <i>Paraburkholderia aspalathi</i> RL17-379-BIF-A      | I | 11 | 8.4   | 1.3 |
| 45  | 2-H2 | <i>Paraburkholderia nemoris</i> RL17-380-BIB-A        | I | 15 | 8.35  | 1.8 |
| 47  | 2-H4 | <i>Paraburkholderia dipogonis</i> RL17-381-BIB-A      | I | 15 | 9.69  | 1.5 |
| 57  | 3-A6 | <i>Paraburkholderia nemoris</i> RL17-376-BIF-D        | I | 17 | 8.57  | 2.0 |
| 58  | 3-B1 | <i>Paraburkholderia sediminicola</i> RL18-035-BIC-A   | I | 12 | 9.38  | 1.3 |
| 59  | 3-B2 | <i>Paraburkholderia sediminicola</i> RL18-035-BIE-A   | I | 13 | 9.89  | 1.3 |
| 62  | 3-B6 | <i>Paraburkholderia nemoris</i> RL18-009-BIC-B        | I | 15 | 8.66  | 1.7 |
| 63  | 3-B9 | <i>Paraburkholderia sediminicola</i> RL18-021-BIF-A   | I | 12 | 8.82  | 1.4 |
| 64  | 3-C2 | <i>Paraburkholderia sediminicola</i> RL18-056-BIE-A   | I | 13 | 8.89  | 1.5 |
| 65  | 3-C4 | <i>Paraburkholderia nemoris</i> RL18-011-BIC-A        | I | 16 | 8.99  | 1.8 |
| 66  | 3-C5 | <i>Paraburkholderia sediminicola</i> RL18-012-BIE-A   | I | 17 | 9.37  | 1.8 |
| 67  | 3-C8 | <i>Paraburkholderia sediminicola</i> RL18-081-BIC-C   | I | 14 | 9.39  | 1.5 |
| 68  | 3-D3 | <i>Paraburkholderia nemoris</i> RL18-043-BIE-A        | I | 15 | 8.65  | 1.7 |
| 69  | 3-D4 | <i>Paraburkholderia sediminicola</i> RL18-082-BIB-A   | I | 15 | 9.51  | 1.6 |
| 70  | 3-D5 | <i>Paraburkholderia fungorum</i> RL18-106-BIC-A       | I | 13 | 8.79  | 1.5 |
| 72  | 3-D7 | <i>Paraburkholderia sediminicola</i> RL18-106-BID-A   | I | 11 | 9.58  | 1.1 |
| 73  | 3-E1 | <i>Paraburkholderia aspalathi</i> RL18-012-BIC-A      | I | 14 | 8.76  | 1.6 |
| 74  | 3-E2 | <i>Paraburkholderia sediminicola</i> RL18-014-BIF-A   | I | 18 | 9.89  | 1.8 |
| 77  | 3-F3 | <i>Paraburkholderia aspalathi</i> RL18-139-BIC-B      | I | 11 | 8.33  | 1.3 |
| 78  | 3-F6 | <i>Paraburkholderia fungorum</i> RL18-167-BIC-A       | I | 13 | 8.81  | 1.5 |
| 80  | 3-F9 | <i>Paraburkholderia sediminicola</i> RL18-106-BIB-A   | I | 11 | 10.16 | 1.1 |
| 81  | 3-G1 | <i>Paraburkholderia sediminicola</i> RL18-114-BIF-A   | I | 16 | 9.06  | 1.8 |
| 84  | 3-H1 | <i>Paraburkholderia aspalathi</i> RL18-101-BIC-A      | I | 13 | 8.41  | 1.5 |
| 85  | 3-H3 | <i>Paraburkholderia sediminicola</i> RL18-154-BIB-A   | I | 14 | 9.15  | 1.5 |
| 86  | 3-H5 | <i>Paraburkholderia sediminicola</i> RL18-079-BIE-A   | I | 14 | 9.15  | 1.5 |
| 87  | 3-H6 | <i>Paraburkholderia sediminicola</i> RL18-120-BIB-A   | I | 14 | 8.74  | 1.6 |
| 89  | 3-I1 | <i>Paraburkholderia aspalathi</i> RL18-045-BIB-A      | I | 14 | 9.13  | 1.5 |
| 90  | 3-I5 | <i>Paraburkholderia sediminicola</i> RL18-085-BIF-A   | I | 15 | 9.33  | 1.6 |
| 91  | 1-B6 | <i>Paraburkholderia sediminicola</i> RL17-333-BIE-A   | I | 13 | 10.89 | 1.2 |
| 92  | 1-F8 | <i>Paraburkholderia sediminicola</i> RL17-342-BIF-A   | I | 14 | 8.98  | 1.6 |
| 101 | 3-D2 | <i>Paraburkholderia nemoris</i> RL18-043-BID-A        | I | 12 | 8.95  | 1.3 |
| 102 | 1-C1 | <i>Paraburkholderia agricolaris</i> RL17-342-BIF-B    | I | 10 | 8.96  | 1.1 |
| 104 | 3-C1 | <i>Paraburkholderia fungorum</i> RL18-030-BIB-A       | I | 14 | 9.5   | 1.5 |
| 105 | 3-E3 | <i>Paraburkholderia madseniana</i> RL18-015-BIC-B     | I | 12 | 9.57  | 1.3 |
| 106 | 4-F6 | <i>Paraburkholderia agricolaris</i> RL19-001-BIB-A    | I | 10 | 8.47  | 1.2 |
| 107 | 4-H5 | <i>Paraburkholderia fungorum</i> RL19-015-BID-A       | I | 12 | 8.61  | 1.4 |
| 109 | 5-A3 | <i>Paraburkholderia agricolaris</i> RL16-012-BIC-B    | I | 11 | 8.97  | 1.2 |
| 110 | 5-A5 | <i>Paraburkholderia fungorum</i> RL17-336-BIC-C       | I | 15 | 10.41 | 1.4 |
| 111 | 5-A6 | <i>Paraburkholderia sp.</i> RL17-337-BIB-A            | I | 16 | 10.84 | 1.5 |
| 113 | 5-A8 | <i>Paraburkholderia madseniana</i> RL17-342-BIB-A     | I | 12 | 9.56  | 1.3 |

\*Clades are color-coded according to the phylogenetic tree in Figure 3. A, *Herbaspirillum* spp.; B, *Caballeronia* spp.; C, *P. azotifingens*; D, *P. megapolitana/acidicola*; E, *P. graminis*; F, *P. strydomiana* A; G, *P. strydomiana* B; H, *P. phytofirmans*; I, *P. sediminicola/fungorum*.



**Table S6. Cluster of Orthologous Genes families used to generate phylogenomic tree.**

| <b>COG Code</b> | <b>Gene</b> | <b>Function</b>                                                                                           |
|-----------------|-------------|-----------------------------------------------------------------------------------------------------------|
| COG0012         | COG0012     | Predicted GTPase, probable translation factor [Translation, ribosomal structure and biogenesis].          |
| COG0013         | AlaS        | Alanyl-tRNA synthetase [Translation, ribosomal structure and biogenesis].                                 |
| COG0016         | PheS        | Phenylalanyl-tRNA synthetase alpha subunit [Translation, ribosomal structure and biogenesis].             |
| COG0018         | ArgS        | Arginyl-tRNA synthetase [Translation, ribosomal structure and biogenesis].                                |
| COG0030         | KsgA        | Dimethyladenosine transferase (rRNA methylation) [Translation, ribosomal structure and biogenesis].       |
| COG0041         | PurE        | Phosphoribosylcarboxyaminoimidazole (NCAIR) mutase [Nucleotide transport and metabolism].                 |
| COG0046         | PurL        | Phosphoribosylformylglycinamide (FGAM) synthase, synthetase domain [Nucleotide transport and metabolism]. |
| COG0048         | RpsL        | Ribosomal protein S12 [Translation, ribosomal structure and biogenesis].                                  |
| COG0049         | RpsG        | Ribosomal protein S7 [Translation, ribosomal structure and biogenesis].                                   |
| COG0051         | RpsJ        | Ribosomal protein S10 [Translation, ribosomal structure and biogenesis].                                  |
| COG0052         | RpsB        | Ribosomal protein S2 [Translation, ribosomal structure and biogenesis].                                   |
| COG0072         | PheT        | Phenylalanyl-tRNA synthetase beta subunit [Translation, ribosomal structure and biogenesis].              |
| COG0080         | RplK        | Ribosomal protein L11 [Translation, ribosomal structure and biogenesis].                                  |
| COG0081         | RplA        | Ribosomal protein L1 [Translation, ribosomal structure and biogenesis].                                   |
| COG0082         | AroC        | Chorismate synthase [Amino acid transport and metabolism].                                                |
| COG0086         | RpoC        | DNA-directed RNA polymerase, beta' subunit/160 kD subunit [Transcription].                                |
| COG0087         | RplC        | Ribosomal protein L3 [Translation, ribosomal structure and biogenesis].                                   |
| COG0088         | RplD        | Ribosomal protein L4 [Translation, ribosomal structure and biogenesis].                                   |
| COG0089         | RplW        | Ribosomal protein L23 [Translation, ribosomal structure and biogenesis].                                  |
| COG0090         | RplB        | Ribosomal protein L2 [Translation, ribosomal structure and biogenesis].                                   |
| COG0091         | RplV        | Ribosomal protein L22 [Translation, ribosomal structure and biogenesis].                                  |
| COG0092         | RpsC        | Ribosomal protein S3 [Translation, ribosomal structure and biogenesis].                                   |
| COG0093         | RplN        | Ribosomal protein L14 [Translation, ribosomal structure and biogenesis].                                  |
| COG0094         | RplE        | Ribosomal protein L5 [Translation, ribosomal structure and biogenesis].                                   |
| COG0096         | RpsH        | Ribosomal protein S8 [Translation, ribosomal structure and biogenesis].                                   |
| COG0097         | RplF        | Ribosomal protein L6P/L9E [Translation, ribosomal structure and biogenesis].                              |
| COG0098         | RpsE        | Ribosomal protein S5 [Translation, ribosomal structure and biogenesis].                                   |
| COG0099         | RpsM        | Ribosomal protein S13 [Translation, ribosomal structure and biogenesis].                                  |
| COG0100         | RpsK        | Ribosomal protein S11 [Translation, ribosomal structure and biogenesis].                                  |
| COG0102         | RplM        | Ribosomal protein L13 [Translation, ribosomal structure and biogenesis].                                  |
| COG0103         | RpsI        | Ribosomal protein S9 [Translation, ribosomal structure and biogenesis].                                   |

|         |         |                                                                                                                            |
|---------|---------|----------------------------------------------------------------------------------------------------------------------------|
| COG0105 | Ndk     | Nucleoside diphosphate kinase [Nucleotide transport and metabolism].                                                       |
| COG0126 | Pgk     | 3-phosphoglycerate kinase [Carbohydrate transport and metabolism].                                                         |
| COG0127 | COG0127 | Xanthosine triphosphate pyrophosphatase [Nucleotide transport and metabolism].                                             |
| COG0130 | TruB    | Pseudouridine synthase [Translation, ribosomal structure and biogenesis].                                                  |
| COG0150 | PurM    | Phosphoribosylaminoimidazole (AIR) synthetase [Nucleotide transport and metabolism].                                       |
| COG0151 | PurD    | Phosphoribosylamine-glycine ligase [Nucleotide transport and metabolism].                                                  |
| COG0164 | RnhB    | Ribonuclease HII [DNA replication, recombination, and repair].                                                             |
| COG0172 | SerS    | Seryl-tRNA synthetase [Translation, ribosomal structure and biogenesis].                                                   |
| COG0185 | RpsS    | Ribosomal protein S19 [Translation, ribosomal structure and biogenesis].                                                   |
| COG0186 | RpsQ    | Ribosomal protein S17 [Translation, ribosomal structure and biogenesis].                                                   |
| COG0215 | CysS    | Cysteinyl-tRNA synthetase [Translation, ribosomal structure and biogenesis].                                               |
| COG0244 | RplJ    | Ribosomal protein L10 [Translation, ribosomal structure and biogenesis].                                                   |
| COG0256 | RplR    | Ribosomal protein L18 [Translation, ribosomal structure and biogenesis].                                                   |
| COG0343 | Tgt     | Queuine/archaeosine tRNA-ribosyltransferase [Translation, ribosomal structure and biogenesis].                             |
| COG0504 | PyrG    | CTP synthase (UTP-ammonia lyase) [Nucleotide transport and metabolism].                                                    |
| COG0519 | GuaA    | GMP synthase, PP-ATPase domain/subunit [Nucleotide transport and metabolism].                                              |
| COG0532 | InfB    | Translation initiation factor 2 (IF-2; GTPase) [Translation, ribosomal structure and biogenesis].                          |
| COG0533 | QRI7    | Metal-dependent proteases with possible chaperone activity [Posttranslational modification, protein turnover, chaperones]. |

**Table S7. BLASTp results (as of Apr. 2023) of encoded proteins in region 2.11 that contains the *mgp* BGC.**

| Name | Size (aa) | Top Blast hit                                                                                                    | Species, % identity, accession code                           |
|------|-----------|------------------------------------------------------------------------------------------------------------------|---------------------------------------------------------------|
| MgpA | 1281      | Polyketide synthase (PKS)                                                                                        | <i>Paraburkholderia megapolitana</i> , 97.81%, WP_266253531.1 |
| MgpB | 2664      | Polyketide synthase - non-ribosomal peptide synthetase hybrid (PKS-NRPS)                                         | <i>Paraburkholderia megapolitana</i> , 99.44%, WP_091015046.1 |
| MgpC | 3743      | Non-ribosomal peptide synthetase (NRPS)                                                                          | <i>Paraburkholderia megapolitana</i> , 99.12%, WP_091015044.1 |
| MgpD | 2369      | Polyketide synthase - non-ribosomal peptide synthetase (PKS-NRPS)                                                | <i>Paraburkholderia megapolitana</i> , 97.98%, WP_091015042.1 |
| MgpE | 2332      | Polyketide synthase (PKS)                                                                                        | <i>Paraburkholderia megapolitana</i> , 98.46%, WP_091015040.1 |
| MgpF | 1892      | Polyketide synthase (PKS)                                                                                        | <i>Paraburkholderia megapolitana</i> , 100%, WP_170275684.1   |
| MgpG | 312       | Cupin-like domain protein                                                                                        | <i>Paraburkholderia megapolitana</i> , 98.94%, WP_091015038.2 |
| MgpH | 569       | PP-Binding domain                                                                                                | <i>Paraburkholderia megapolitana</i> , 98.95%, WP_266253524.1 |
| MgpI | 271       | Thioesterase (TE)                                                                                                | <i>Paraburkholderia megapolitana</i> , 98.63%, WP_266253523.1 |
| MgpJ | 240       | 4'-phosphopantetheinyl transferase                                                                               | <i>Paraburkholderia megapolitana</i> , 100%, WP_091015031.2   |
| MgpK | 483       | polysaccharide pyruvyl transferase family protein                                                                | <i>Paraburkholderia megapolitana</i> , 99.49%, WP_091015023.1 |
| MgpL | 587       | 2-succinyl-5-enolpyruvyl-6-hydroxy-3-cyclohexene-1-carboxylate synthase (thiamine pyrophosphate dependent lyase) | <i>Paraburkholderia megapolitana</i> , 99.79%, WP_170275682.2 |
| MgpM | 254       | metallophosphoesterase                                                                                           | <i>Paraburkholderia megapolitana</i> , 100%, WP_266253521.1   |
| MgpN | 550       | AMP-binding                                                                                                      | <i>Paraburkholderia megapolitana</i> , 99.82%, WP_091015017.1 |

**Table S8. <sup>1</sup>H (600 MHz) and <sup>13</sup>C NMR (150 MHz) data for megapolipeptin A (1) in DMSO-*d*<sub>6</sub><sup>a</sup>.**

|                   | position          | δ <sub>H</sub> (J in Hz) | δ <sub>C</sub> , mult |
|-------------------|-------------------|--------------------------|-----------------------|
| A <sub>hpa</sub>  | 1                 |                          | 173.4, qC             |
|                   | 2a                | 2.26, dd (14.6, 2.8)     | 39.9, CH <sub>2</sub> |
|                   | 2b                | 2.08, dd (14.6, 9.8)     |                       |
|                   | 3                 | 3.85, m                  | 67.5, CH              |
|                   | 4                 | 3.64, m                  | 55.1, CH              |
|                   | 5a                | 3.49, m                  | 60.4, CH <sub>2</sub> |
|                   | 5b                | 3.49, m                  |                       |
|                   | 4-NH              | 7.58, d (9.0)            |                       |
|                   | 1-NH <sub>2</sub> | 7.19, s                  |                       |
|                   |                   | 6.76, s                  |                       |
| <sup>1</sup> Thr  | 1                 |                          | 169.8, qC             |
|                   | 2                 | 4.21, m                  | 58.6, CH              |
|                   | 3                 | 3.84, m                  | 67.1, CH              |
|                   | 4                 | 1.04, d (6.4)            | 19.6, CH <sub>3</sub> |
|                   | 2-NH              | 7.86, brd (7.6)          |                       |
|                   | <sup>2</sup> Thr  | 1                        |                       |
| 2                 |                   | 4.32, dd (8.4)           | 57.6, CH              |
| 3                 |                   | 3.93, m                  | 66.8, CH              |
| 4                 |                   | 0.96, d (6.3)            | 19.2, CH <sub>3</sub> |
| 2-NH              |                   | 7.93, brs                |                       |
| A <sub>dhda</sub> |                   | 1                        |                       |
|                   | 2a                | 2.56, m                  | 39.3, CH <sub>2</sub> |
|                   | 2b                | 2.36, m                  |                       |
|                   | 3                 | 4.21, m                  | 44.4, CH              |
|                   | 4a                | 1.51, m                  | 41.8, CH <sub>2</sub> |
|                   | 4b                | 1.51, m                  |                       |
|                   | 5                 | 3.39, m                  | 66.6, CH              |
|                   | 6a                | 1.37, m                  | 36.8, CH <sub>2</sub> |
|                   | 6b                | 1.23, m                  |                       |
|                   | 7a                | 1.25, m                  | 29.2, CH <sub>2</sub> |
|                   | 7b                | 1.25, m                  |                       |
|                   | 8a                | 1.33, m                  | 24.3, CH <sub>2</sub> |
|                   | 8b                | 1.23, m                  |                       |
|                   | 9a                | 1.91, m                  | 32.0, CH <sub>2</sub> |
|                   | 9b                | 1.91, m                  |                       |
|                   | 10                | 5.36, m                  | 130.3, CH             |
|                   | 11                | 5.35, m                  | 129.6, CH             |
|                   | 12a               | 1.99, brs                | 32.1, CH <sub>2</sub> |

|      |      |               |                       |
|------|------|---------------|-----------------------|
|      | 12b  | 1.99, brs     |                       |
|      | 13a  | 1.99, brs     | 32.1, CH <sub>2</sub> |
|      | 13b  | 1.99, brs     |                       |
|      | 14   | 5.35, m       | 129.4, CH             |
|      | 15   | 5.36, m       | 130.2, CH             |
|      | 16a  | 1.90, m       | 32, CH <sub>2</sub>   |
|      | 16b  | 1.90, m       |                       |
|      | 17a  | 1.23, m       | 24.7, CH <sub>2</sub> |
|      | 17b  | 1.23, m       |                       |
|      | 18a  | 1.42, m       | 34.8, CH <sub>2</sub> |
|      | 18b  | 1.26, m       |                       |
|      | 19   | 3.45, m       | 75.1, CH              |
|      | 20   | 1.04, d (6.4) | 20.3, CH <sub>3</sub> |
|      | 21   |               | 159.8, qC             |
|      | 3-NH | 8.49, d (9.0) |                       |
| Hoha | 1    |               | 174.0, qC             |
|      | 2    | 4.16, m       | 72.9, CH              |
|      | 3a   | 2.72, m       | 45.3, CH <sub>2</sub> |
|      | 3b   | 2.72, m       |                       |
|      | 4    |               | 206.2, qC             |
|      | 5a   | 2.71, m       | 37.4, CH <sub>2</sub> |
|      | 5b   | 2.66, m       |                       |
|      | 6a   | 2.38, m       | 27.7, CH <sub>2</sub> |
|      | 6b   | 2.38, m       |                       |
|      | 7    |               | 173.6, qC             |
| Mpo  | 1    |               | 202.4, qC             |
|      | 2    | 3.39, m       | 33.9, CH              |
|      | 3    | 1.01, d (7.2) | 17.5, CH <sub>3</sub> |
|      | 4    | 1.01, d (7.2) | 17.3, CH <sub>3</sub> |

<sup>a</sup> All data was acquired on a 600 MHz NMR spectrometer equipped with a 5mm QCI cryoprobe.

**Table S9. <sup>1</sup>H (600 MHz) and <sup>13</sup>C NMR (150 MHz) data for megapolipeptin B (2) in DMSO-*d*<sub>6</sub><sup>a</sup>.**

|                   | position          | δ <sub>H</sub> (J in Hz) | δ <sub>C</sub> , mult |           |
|-------------------|-------------------|--------------------------|-----------------------|-----------|
| A <sub>hpa</sub>  | 1                 |                          | 173.4, qC             |           |
|                   | 2a                | 2.26, m                  | 39.9, CH <sub>2</sub> |           |
|                   | 2b                | 2.08, dd (14.8, 9.5)     |                       |           |
|                   | 3                 | 3.85, m                  | 67.5, CH              |           |
|                   | 4                 | 3.64, m                  | 55.1, CH              |           |
|                   | 5a                | 3.48, m                  | 60.4, CH <sub>2</sub> |           |
|                   | 5b                | 3.48, m                  |                       |           |
|                   | 4-NH              | 7.62, d (8.7)            |                       |           |
|                   | 1-NH <sub>2</sub> |                          | 7.20, s               |           |
|                   |                   |                          | 6.75, s               |           |
| <sup>1</sup> Thr  | 1                 |                          | 169.8, qC             |           |
|                   | 2                 | 4.21, m                  | 58.6, CH              |           |
|                   | 3                 | 3.84, m                  | 67.1, CH              |           |
|                   | 4                 | 1.05, m                  | 19.6, CH <sub>3</sub> |           |
|                   | 2-NH              | 7.95, brs                |                       |           |
|                   | <sup>2</sup> Thr  | 1                        |                       | 169.9, qC |
| 2                 |                   | 4.31, m                  | 57.8, CH              |           |
| 3                 |                   | 3.93, m                  | 66.8, CH              |           |
| 4                 |                   | 0.95, d (6.0)            | 19.2, CH <sub>3</sub> |           |
| 2-NH              |                   | 8.04, brs                |                       |           |
| A <sub>dhta</sub> |                   | 1                        |                       | 170.5, qC |
|                   | 2a                | 2.56, m                  | 39.3, CH <sub>2</sub> |           |
|                   | 2b                | 2.36, m                  |                       |           |
|                   | 3                 | 4.21, m                  | 44.4, CH              |           |
|                   | 4a                | 1.52, m                  | 41.8, CH <sub>2</sub> |           |
|                   | 4b                | 1.52, m                  |                       |           |
|                   | 5                 | 3.39, m                  | 66.5, CH              |           |
|                   | 6a                | 1.42, m                  | 36.8, CH <sub>2</sub> |           |
|                   | 6b                | 1.30, m                  |                       |           |
|                   | 7a                | 2.03, m                  | 28.2, CH <sub>2</sub> |           |
|                   | 7b                | 1.92, m                  |                       |           |
|                   | 8                 | 5.36, m                  | 130.3, CH             |           |
|                   | 9                 | 5.36, m                  | 129.8, CH             |           |
|                   | 10a               | 1.99, m                  | 32.1, CH <sub>2</sub> |           |
|                   | 10b               | 1.99, m                  |                       |           |
|                   | 11a               | 1.99, m                  | 32.1, CH <sub>2</sub> |           |
|                   | 11b               | 1.99, m                  |                       |           |
|                   | 12                | 5.36, m                  | 129.5, CH             |           |

|      |      |               |                       |
|------|------|---------------|-----------------------|
|      | 13   | 5.36, m       | 129.1, CH             |
|      | 14a  | 1.99, m       | 32.1, CH <sub>2</sub> |
|      | 14b  | 1.99, m       |                       |
|      | 15a  | 1.99, m       | 32.1, CH <sub>2</sub> |
|      | 15b  | 1.99, m       |                       |
|      | 16   | 5.36, m       | 129.7, CH             |
|      | 17   | 5.36, m       | 130.2, CH             |
|      | 18a  | 1.91, m       | 32.0, CH <sub>2</sub> |
|      | 18b  | 1.91, m       |                       |
|      | 19a  | 1.23, m       | 24.6, CH <sub>2</sub> |
|      | 19b  | 1.23, m       |                       |
|      | 20a  | 1.42, m       | 34.8, CH <sub>2</sub> |
|      | 20b  | 1.25, m       |                       |
|      | 21   | 3.46, m       | 75.1, CH              |
|      | 22   | 1.04, m       | 20.3, CH <sub>3</sub> |
|      | 23   |               | 159.8, qC             |
|      | 3-NH | 8.49, d (8.7) |                       |
| Hoha | 1    |               | 174.5, qC             |
|      | 2    | 4.13, m       | 73.5, CH              |
|      | 3a   | 2.72, m       | 45.3, CH <sub>2</sub> |
|      | 3b   | 2.72, m       |                       |
|      | 4    |               | 206.3, qC             |
|      | 5a   | 2.71, m       | 37.4, CH <sub>2</sub> |
|      | 5b   | 2.66, m       |                       |
|      | 6a   | 2.37, m       | 27.6, CH <sub>2</sub> |
|      | 6b   | 2.37, m       |                       |
|      | 7    |               | 173.8, qC             |
| Mpo  | 1    |               | 202.3, qC             |
|      | 2    | 3.39, m       | 33.9, CH              |
|      | 3    | 1.01, d (7.3) | 17.5, CH <sub>3</sub> |
|      | 4    | 1.01, d (7.3) | 17.3, CH <sub>3</sub> |

<sup>a</sup> All data was acquired on a 600 MHz NMR spectrometer equipped with a 5mm QCI cryoprobe.

**Table S10. Bacterial target panel strains and culture conditions.**

| Strain Name                                          | Strain Designation | BSL | Growth Medium | Growth Condition         |
|------------------------------------------------------|--------------------|-----|---------------|--------------------------|
| <b>Gram-Positive</b>                                 |                    |     |               |                          |
| <i>Bacillus subtilis</i>                             | ATCC 6051          | 1   | TSB           | 37°C                     |
| <i>Enterococcus faecalis</i>                         | ATCC 29212         | 2   | BHI           | 37°C                     |
| <i>Enterococcus faecium</i>                          | ATCC 6569          | 2   | BHI           | 37°C                     |
| <i>Listeria ivanovii</i>                             | BAA-139            | 1   | BHI-A; HTM    | 37°C; 5% CO <sub>2</sub> |
| <i>Staphylococcus aureus</i> (Methicillin-Resistant) | BAA-44             | 2   | TSB           | 37°C                     |
| <i>Staphylococcus aureus</i> (Methicillin-Sensitive) | ATCC 29213         | 2   | TSB           | 37°C                     |
| <i>Staphylococcus epidermidis</i>                    | ATCC 14990         | 1   | TSB           | 37°C                     |
| <b>Gram-Negative</b>                                 |                    |     |               |                          |
| <i>Escherichia coli</i>                              | K-12 MG1655        | 1   | NB            | 37°C                     |
| <i>Klebsiella aerogenes</i>                          | ATCC 35029         | 1   | NB            | 37°C                     |
| <i>Klebsiella pneumoniae</i>                         | ATCC 700603        | 2   | NB            | 37°C                     |
| <i>Ochrobactrum anthropi</i>                         | ATCC 49687         | 1   | TSB           | 37°C                     |
| <i>Providencia alcalifaciens</i>                     | ATCC 9886          | 1   | TSB           | 37°C                     |
| <i>Pseudomonas aeruginosa</i>                        | ATCC 27853         | 2   | TSB           | 37°C                     |
| <i>Salmonella enterica</i>                           | ATCC 13311         | 2   | NB            | 37°C                     |
| <i>Shigella sonnei</i>                               | ATCC 25931         | 2   | NB            | 37°C                     |
| <i>Vibrio cholerae</i>                               | A1552 El Tor       | 2   | TSB           | 37°C                     |
| <i>Yersinia pseudotuberculosis</i>                   | ATCC 6904          | 2   | BHI           | 37°C                     |

**Table S11. Antimicrobial activities of megapolipectins A (1) and B (2).**

| Strain Name                                          | Megapolipectin A (1) | Megapolipectin B (2) |
|------------------------------------------------------|----------------------|----------------------|
| <b>Gram-Positive Bacteria</b>                        |                      |                      |
| <i>Bacillus subtilis</i>                             | >128 µM              | >128 µM              |
| <i>Enterococcus faecalis</i>                         | >128 µM              | >128 µM              |
| <i>Enterococcus faecium</i>                          | >128 µM              | >128 µM              |
| <i>Listeria ivanovii</i>                             | >128 µM              | >128 µM              |
| <i>Staphylococcus aureus</i> (Methicillin-Resistant) | >128 µM              | >128 µM              |
| <i>Staphylococcus aureus</i> (Methicillin-Sensitive) | >128 µM              | >128 µM              |
| <i>Staphylococcus epidermidis</i>                    | >128 µM              | >128 µM              |
| <b>Gram-Negative Bacteria</b>                        |                      |                      |
| <i>Escherichia coli</i>                              | >128 µM              | >128 µM              |
| <i>Klebsiella aerogenes</i>                          | >128 µM              | >128 µM              |
| <i>Klebsiella pneumoniae</i>                         | >128 µM              | >128 µM              |
| <i>Ochrobactrum anthropi</i>                         | >128 µM              | >128 µM              |
| <i>Providencia alcalifaciens</i>                     | >128 µM              | >128 µM              |
| <i>Pseudomonas aeruginosa</i>                        | >128 µM              | >128 µM              |
| <i>Salmonella enterica</i>                           | >128 µM              | >128 µM              |
| <i>Shigella sonnei</i>                               | >128 µM              | >128 µM              |
| <i>Vibrio cholerae</i>                               | >128 µM              | >128 µM              |
| <i>Yersinia pseudotuberculosis</i>                   | >128 µM              | >128 µM              |
| <b>Fungi</b>                                         |                      |                      |
| <i>Aspergillus niger</i>                             | >100 µM              | >100 µM              |
| <i>Candida albicans</i>                              | >100 µM              | >100 µM              |
| <i>Purpureocillium lilacinum</i>                     | >100 µM              | >100 µM              |
| <i>Saccharomyces cerevisiae</i>                      | >100 µM              | >100 µM              |



**Table S12. Fungal target panel strains and culture conditions.**

| Strain Name                      | Strain Designation | BSL | Growth Medium | Growth Condition |
|----------------------------------|--------------------|-----|---------------|------------------|
| <i>Aspergillus niger</i>         | DSM 737            | 1   | PDB           | 22°C             |
| <i>Candida albicans</i>          | ATCC 14053         | 2   | SDB           | 37°C             |
| <i>Purpureocillium lilacinum</i> | DSM 846            | 2   | PDB           | 22°C             |
| <i>Saccharomyces cerevisiae</i>  | ATCC 9763          | 1   | YMB           | 37°C             |

**Table S13. Adenylation domain signature on megapolipeptin BGC.** Comparative analysis of adenylation domains encoded in the megapolipeptin BGC and their respective amino acid candidate codes. First row is adenylation domain signatures found in the megapolipeptin BGC followed by the predicted code according to Stachelhaus *et al.*<sup>17</sup>. For MgpB\_A1, the  $\alpha$ -keto acid code<sup>18</sup> is also shown. Red letters indicate amino acids that can vary, yellow letters, amino acids mutated from the expected code, and brown letters, amino acids mutated but where variations can occur according to the code.

|                      |     |     |     |     |     |     |     |     |     |     |                             |
|----------------------|-----|-----|-----|-----|-----|-----|-----|-----|-----|-----|-----------------------------|
| <b>Domain</b>        | 235 | 236 | 239 | 278 | 299 | 301 | 322 | 330 | 331 | 517 | <b>amino acid predicted</b> |
| MgpB_A1              | D   | V   | L   | F   | L   | G   | A   | I   | L   | K   | ?                           |
| Pro                  | D   | V   | Q   | L   | I   | A   | H   | V   | V   | K   | Pro code                    |
| $\alpha$ -keto group | I   | G   | M   | I   | G   | A   | M   | S   | A   | K   | $\alpha$ -keto acid code    |
|                      |     |     |     |     |     |     |     |     |     |     |                             |
| <b>Domain</b>        | 235 | 236 | 239 | 278 | 299 | 301 | 322 | 330 | 331 | 517 | <b>amino acid predicted</b> |
| MgpC_A1              | D   | F   | W   | N   | V   | G   | M   | V   | H   | K   | Thr                         |
| Thr/Dht              | D   | F   | W   | N   | I   | G   | M   | V   | H   | K   | Thr/Dht code                |
|                      |     |     |     |     |     |     |     |     |     |     |                             |
| <b>Domain</b>        | 235 | 236 | 239 | 278 | 299 | 301 | 322 | 330 | 331 | 517 | <b>amino acid predicted</b> |
| MgpC_A2              | D   | V   | W   | H   | F   | S   | L   | V   | D   | K   | Ser                         |
| Ser                  | D   | V   | W   | H   | L   | S   | L   | I   | D   | K   | Ser code                    |
|                      |     |     |     |     |     |     |     |     |     |     |                             |
| <b>Domain</b>        | 235 | 236 | 239 | 278 | 299 | 301 | 322 | 330 | 331 | 517 | <b>amino acid predicted</b> |
| MgpD_A1              | D   | A   | M   | W   | I   | G   | G   | V   | L   | K   | Val (1)                     |
| Val (1)              | D   | A   | F   | W   | I   | G   | G   | T   | F   | K   | Val (1) code                |
| Val (2)              | D   | F   | E   | S   | T   | A   | A   | V   | Y   | K   | Val (2) code                |
| Val (3)              | D   | A   | W   | M   | F   | A   | A   | V   | L   | K   | Val (3) code                |

**Table S14. Natural product families with structural similarity to megapolipeptins.** Top 10 NP Atlas natural product family hits and bolagladin. Only one congener for each natural product family is shown. For example, rotihibin A, B, and C appear in the top10 for compounds but only rotihibin C is listed as the family member. Compounds in bold are mentioned in the main text.

| NPA ID    | Compound name           | Compound molecular formula | Compound accurate mass | Bacterium                                     | Original reference PMID | Similarity score | Reported activity                                                 |
|-----------|-------------------------|----------------------------|------------------------|-----------------------------------------------|-------------------------|------------------|-------------------------------------------------------------------|
| NPA033310 | <b>Rotihibin C</b>      | C36H65N11O13               | 859.4763               | <i>Streptomyces scabies</i>                   | 34346752                | 0.58             | herbicidal (mTOR inhibitor)                                       |
| NPA024388 | <b>Crochelin C</b>      | C38H69N9O14                | 875.4964               | Unknown-bacterium                             | 29134779                | 0.57             | siderophore                                                       |
| NPA021543 | Linear surfactins       | C52H93N7O14                | 1039.6781              | <i>Micromonospora</i> sp. CPCC 202787         | 27301660                | 0.56             | biosurfactant                                                     |
| NPA025683 | <b>Megapolibactin A</b> | C36H63N11O19               | 953.4302               | <i>Paraburkholderia megapolitana</i>          | 31276269                | 0.56             | siderophore                                                       |
| NPA024966 | Gramibactin B           | C32H56N10O17               | 852.3825               | <i>Trinickia caryophylli</i>                  | 31605027                | 0.55             | siderophore                                                       |
| NPA031566 | Pseudodesmin C          | C54H98N10O16               | 1142.7162              | <i>Pseudomonas tolaasii</i>                   | 32868430                | 0.55             | moderate antibacterial                                            |
| NPA032808 | Syringafactin D         | C56H103N9O13               | 1109.7675              | <i>Pseudomonas syringae</i> pv. tomato DC3000 | 17601782                | 0.55             | biosurfactant                                                     |
| NPA033288 | Thanafactin A           | C43H75N9O13                | 925.5484               | <i>Pseudomonas fluorescens</i> DSM 11579      | 33382250                | 0.55             | weak protease inhibitory activity and swarming motility modulator |
| NPA009608 | Gageostatin A           | C52H93N7O14                | 1039.6781              | <i>Bacillus</i> sp. SNA-60-367                | 24492520                | 0.54             | antifungal, antibacterial, cytotoxic                              |
| NPA010214 | Cupriachelin            | C33H57N7O16                | 807.3862               | <i>Cupriavidus necator</i> H16                | 22381697                | 0.54             | siderophore                                                       |
| NPA033055 | <b>Bolagladin A</b>     | C39H61N5O14                | 823.4215               | <i>Burkholderia gladioli</i> BCC0238          |                         | 0.39             | moderate antibacterial                                            |

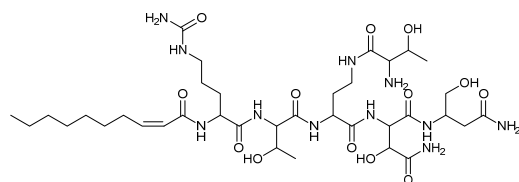

**Rotihibin C**

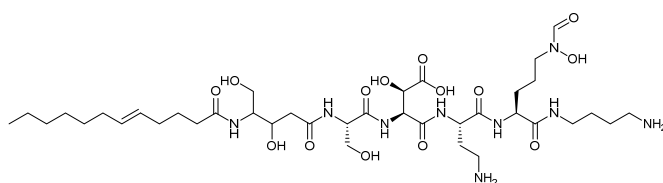

**Crochelin C**

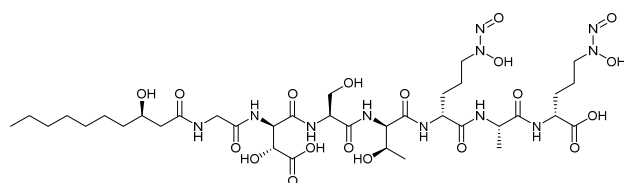

**Megapolibactin A**

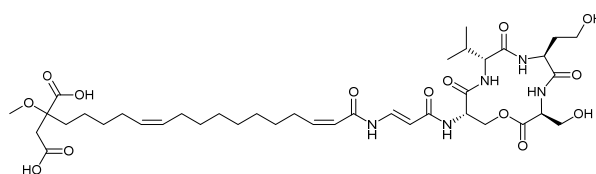

**Bolagladin A**

**Table S15. Detailed MALDI-TOF MS parameters for IDBac analysis.**

| Parameter                                                                   | Protein Spectra                    | Specialized Metabolite Spectra             |
|-----------------------------------------------------------------------------|------------------------------------|--------------------------------------------|
| Instrument type                                                             | autoflex                           | autoflex                                   |
| flexControl version                                                         | flexControl 3.4.135.0              | flexControl 3.4.135.0                      |
| Digitizer type                                                              | LeCroy LSA2000                     | LeCroy LSA2000                             |
| Number of shots                                                             | 1000                               | 1000                                       |
| Retention time for Warp-LC                                                  | 0 s                                | 0 s                                        |
| Digitizer bit depth                                                         | 8                                  | 8                                          |
| AIDA version number                                                         | AIDA4.7.373.7                      | AIDA4.7.373.7                              |
| Target type                                                                 | 280784                             | 280784                                     |
| Spectrum delay                                                              | 29918 ns                           | 9316 ns                                    |
| SampleRate reciprocal                                                       | 1.6 ns                             | 0.2 ns                                     |
| Spectrum Size                                                               | 41642 pts                          | 253781 pts                                 |
| Himass turbo mode                                                           | FALSE                              | FALSE                                      |
| Laser repetition rate                                                       | 2000 Hz                            | 2000 Hz                                    |
| Linear detector voltage                                                     | 3.072 – 3.107 kV                   | 3.072 kV                                   |
| Reflector detector voltage                                                  | 2.166 – 2.317 kV                   | 2.166 – 2.232 kV                           |
| Voltage of high mass detector                                               | 0 kV                               | 0 kV                                       |
| Realtime smooth                                                             | high                               | off                                        |
| AutoXecute method                                                           | IDBac_Protein_AutoX                | IDBac_Small-Molecule_autoX                 |
| flexAnalysis method                                                         | IDBac Protein CalibrantCalibration | IDBac Small Molecule Calibrant Calibration |
| A flat line is created if the acceptance criteria of AutoXecute are not met | FALSE                              | FALSE                                      |
| Flag indicating in source decay measurement                                 | FALSE                              | FALSE                                      |
| Flag indicating HPC usage                                                   | FALSE                              | FALSE                                      |
| Calibration mass control list                                               | MBT_Standard                       | IDBac small molecule calibration           |
| Sensitivity of digitizer                                                    | 100 mV/fullscale                   | 100 mV/fullscale                           |
| Analog Offset                                                               | 1.4 mV                             | 1.6 mV                                     |
| Deflection pulser cal                                                       | 0                                  | 0                                          |
| PIE decay                                                                   | 330 ns                             | 200 ns                                     |
| Positive voltage polarity                                                   | POS                                | POS                                        |
| Reflector voltage 1                                                         | 0 kV                               | 21 kV                                      |
| Reflector voltage 2                                                         | 0 kV                               | 9.7 kV                                     |
| Ion source voltage 1                                                        | 19.5 kV                            | 19 kV                                      |
| Ion source voltage 2                                                        | 18.25 kV                           | 16.8 kV                                    |
| Lens voltage                                                                | 7 kV                               | 8.5 kV                                     |
| Matrix suppression mode                                                     | deflection                         | deflection                                 |
| Matric suppression cut off mass                                             | 1900                               | 50                                         |

## FIGURES

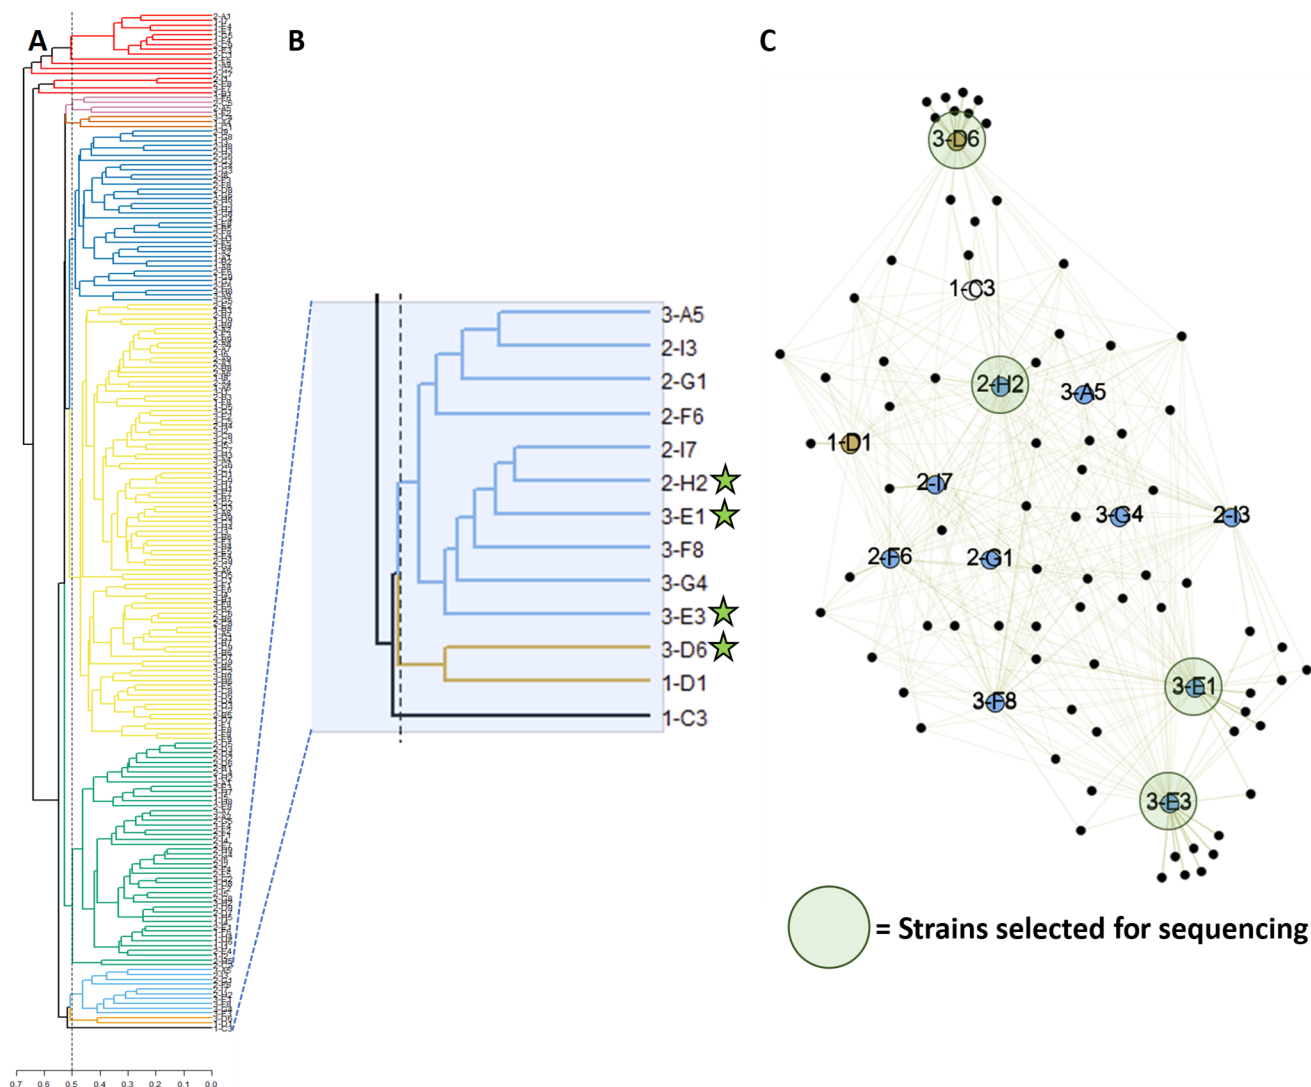

**Figure S1. Example of IDBac strain prioritization.** (A) An IDBac dendrogram showing MALDI-TOF MS protein spectrum similarity (2,000-15,000 Da) of 230 isolates from cycle 1. (B) Zoom-in of a grouping that contains 13 isolates. (C) Metabolite association network (200-2,000 Da) of the 13 isolates from panel B. Large nodes represent isolates color-coded according to panel B. Small black nodes represent  $m/z$  features. Association of a  $m/z$  feature with an isolate is represented with a yellow line. To prioritize isolates, the first step was to eliminate those lacking any unique  $m/z$  features (e.g., 2-I3). Next, isolates were prioritized by the total number of unique  $m/z$  features, selecting the minimum number of isolates that would maximize chemical space coverage. Isolates highlighted with a large green circle were selected for genome sequencing.

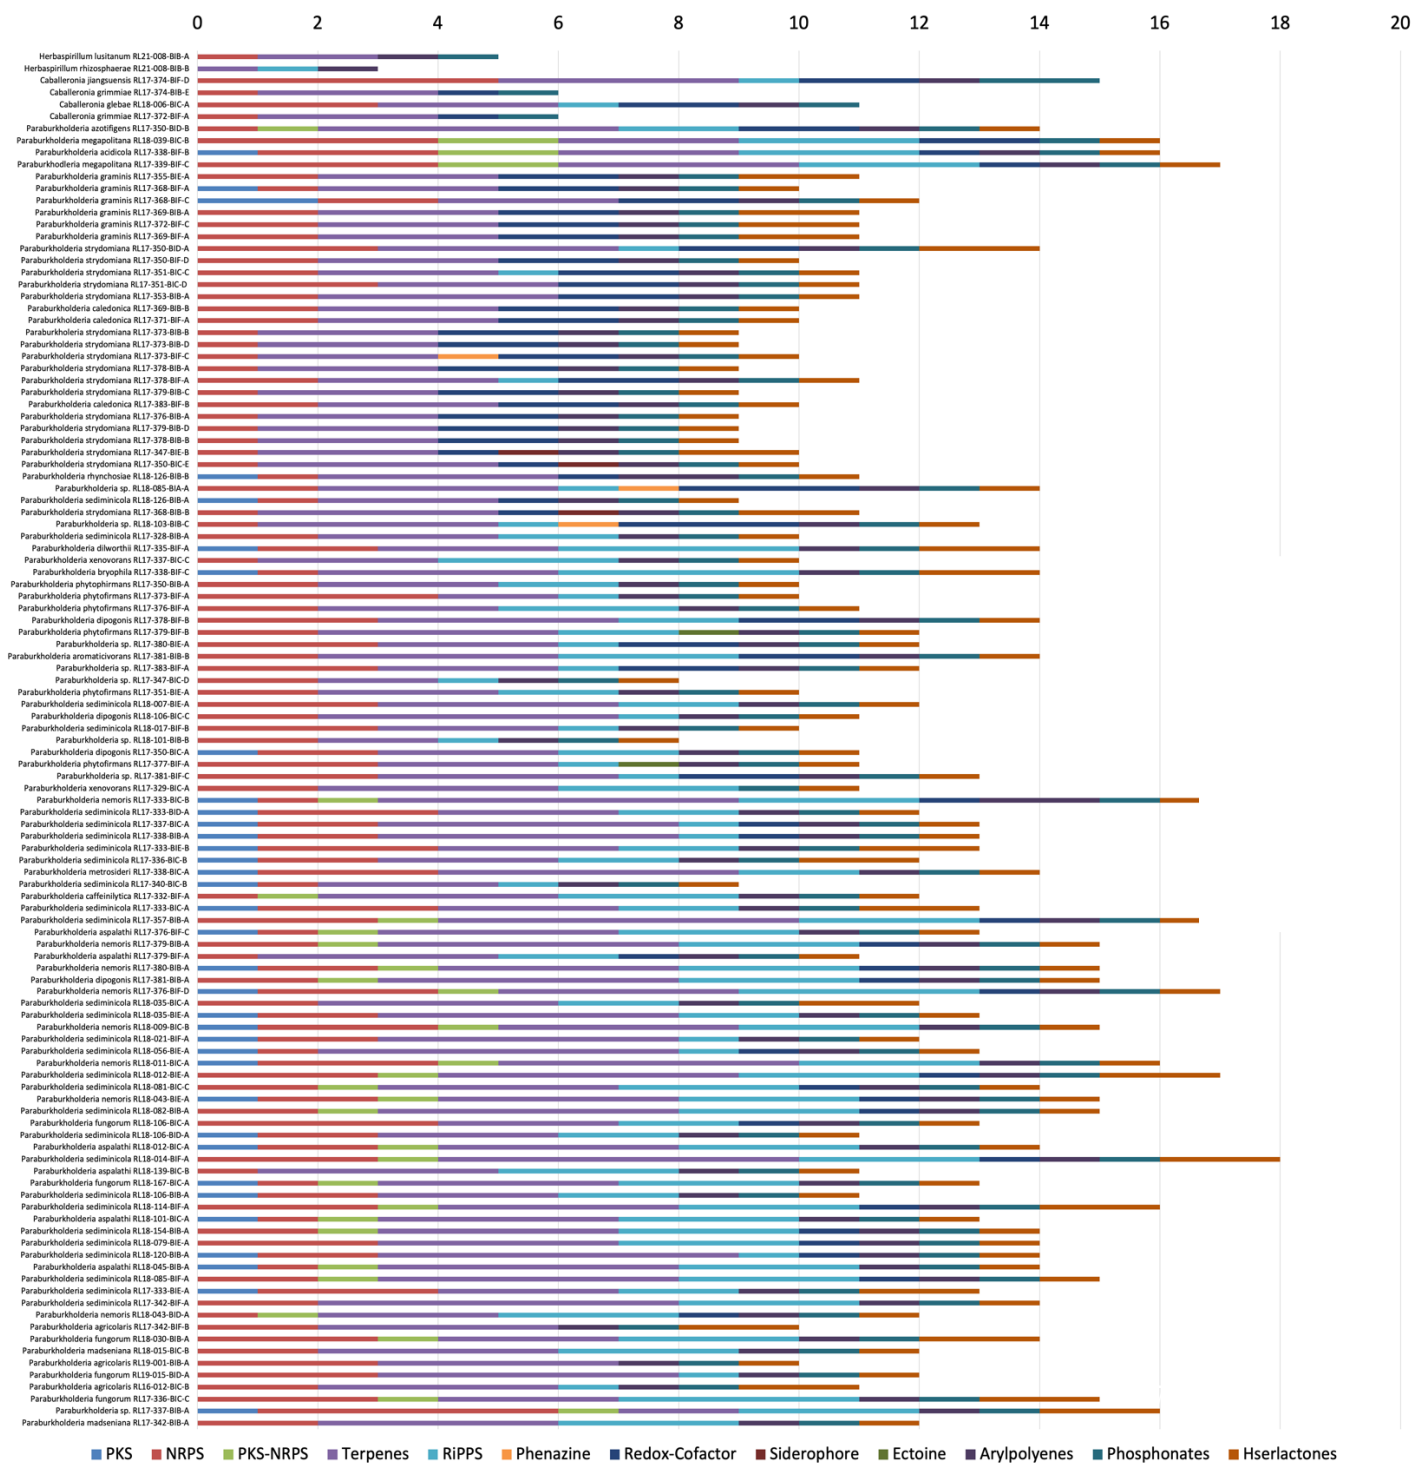

**Figure S2. Biosynthetic Gene Cluster numbers and biosynthetic class by strain.** 115 Burkholderiales strains (“y” axis) are depicted in terms of BGCs numbers (“x” axis) and biosynthetic class (12 in total, color coded) comprising PKS, NRPS, hybrid PKS-NRPS, terpenes, RiPPS, phenazines, redox-cofactor, siderophore, ectoines, arylpolyenes, phosphonates, homoserine lactones.

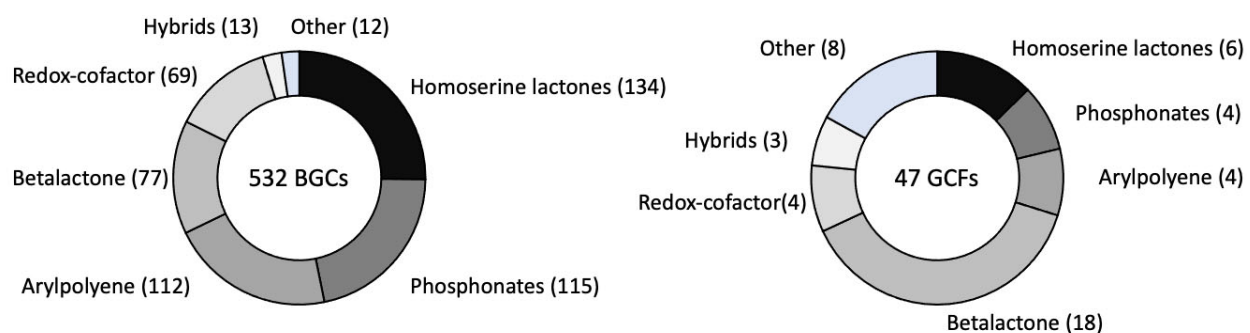

**Figure S3. Pie charts showing subdivisions of ‘other’ biosynthetic gene clusters.** The category ‘other’ from the main text is here subdivided in 7 major groups. The left donut chart represents BGCs and the right donut chart represents GCFs.

Tree scale: 0.1

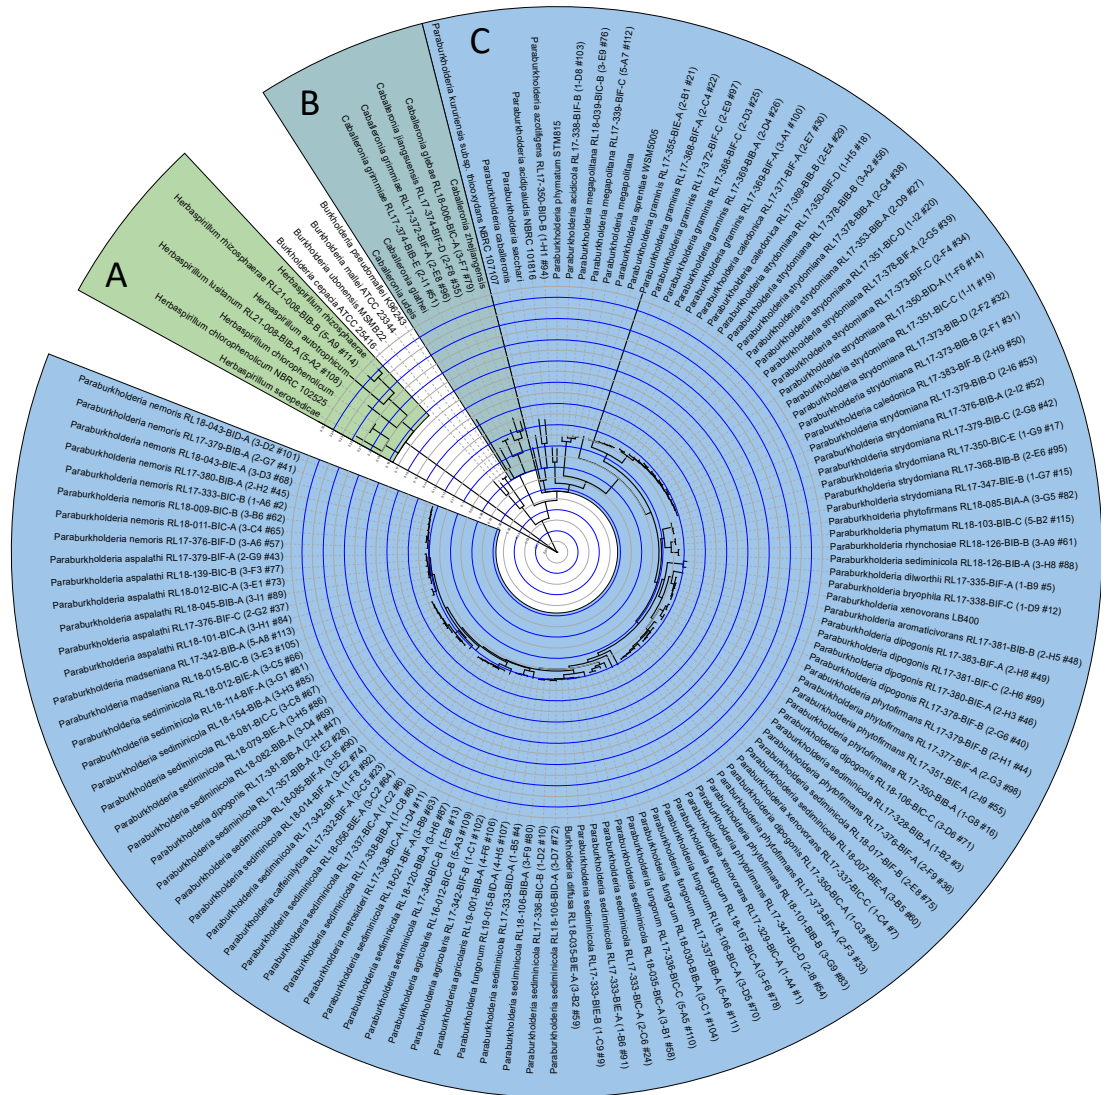

**Figure S4. Phylogenomic tree of Burkholderiales library.** The three genera present in the collection are highlighted. **(A)** *Herbaspirillum* spp. **(B)** *Caballeronia* spp. **(C)** *Paraburkholderia* spp. Select *Burkholderia*, *Paraburkholderia*, *Herbasparillum* and *Caballeronia* genomes available in public databases were included as well, scale bar represents the number of substitutions per site. The phylogenomic tree was constructed on KBase server by using the ‘Insert Genome into SpeciesTree – v2.2.0’ app<sup>19</sup>. KBase allows a user to build phylogenomic trees using a set of 49 core, universal genes (SI Table S6) defined by Cluster of Orthologous Genes (COG) families. SpeciesTree applies a heuristic variant of the neighbor-joining method.



Tree scale: 0.1

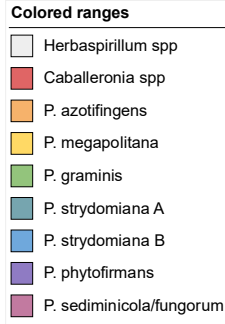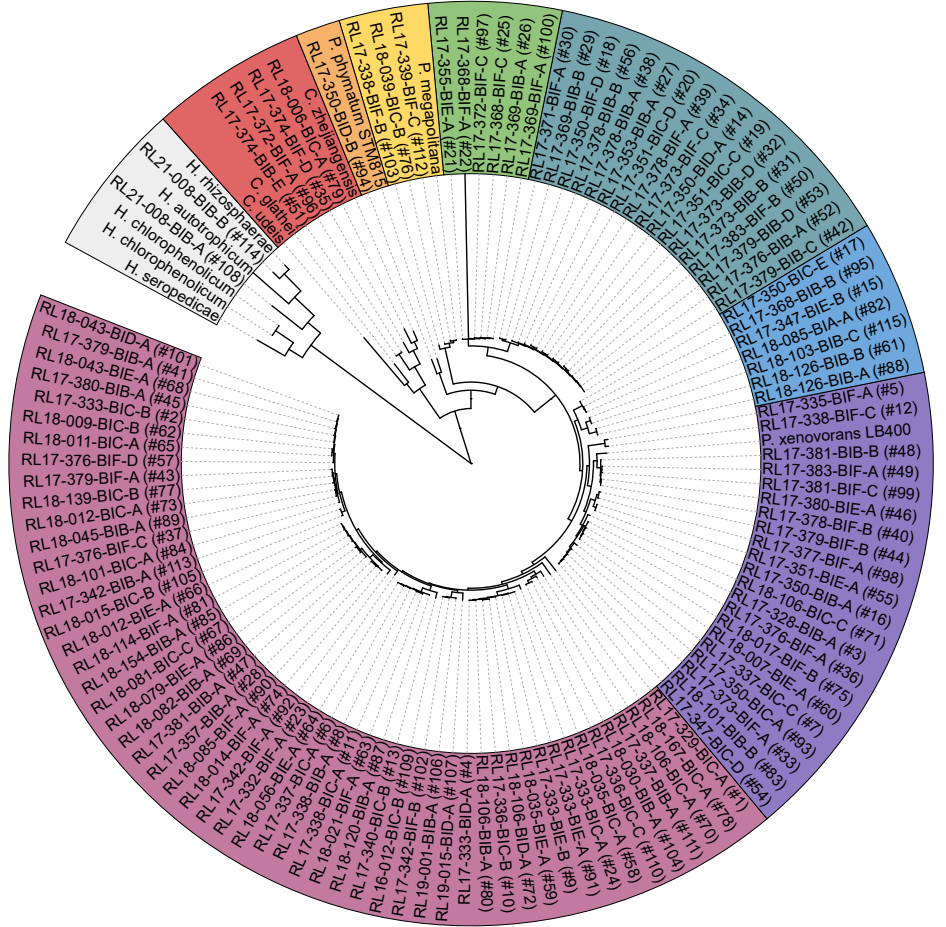

**Figure S5. Phylogenomic tree of Burkholderiales library.** Phylogenomic tree of Figure 3A. containing all *Burkholderiales* strains decorated with evolutionary distance.



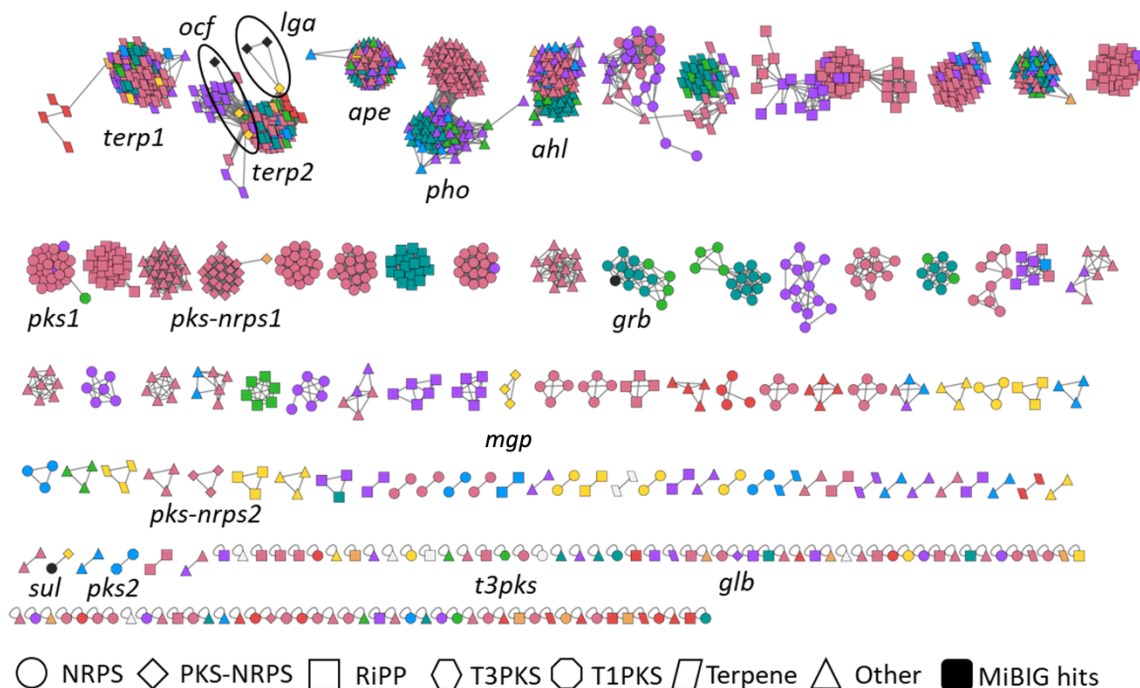

**Figure S6. BiG-SCAPE biosynthetic gene cluster Sequence Similarity Network within the 115 Burkholderiales genomes.** ( $C = 0.4$ ). The direct antiSMASH output was used to generate the network. A total of 1,383 BGCs, that includes some superclusters, are displayed, color-coded according to the clades in Fig. S5. MiBiG BGCs are shown in black nodes. MiBiG BGCs that appeared as singletons were removed. Node shape indicates BGC class according to BiG-SCAPE classification. Known BGCs and orphan BGCs described in the text are highlighted. Superclusters containing PKS-NRPS BGCs were manually curated to split the clusters and generate **Figure 3B** in the main text. Examples of terpene and PKS-NRPS superclusters include *ocf* and *lga*, explaining why these two known PKS-NRPS clusters formed a network with terpenes (*terp2*).

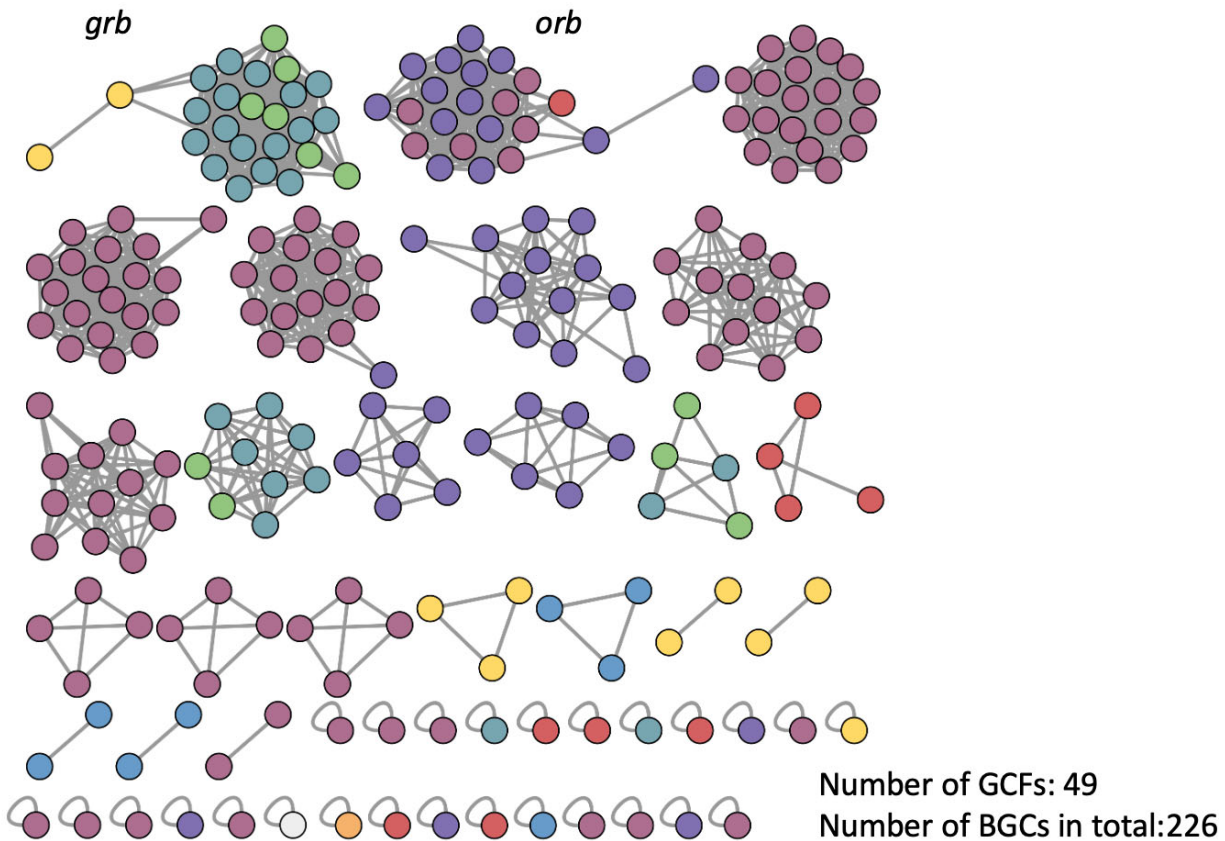

**Figure S7. NRPS networks and singletons.** All NRPS networks and singletons extracted from the BiG-SCAPE analysis shown in Fig. 3B. The gramibactin (*grb*) and ornibactin (*orb*) networks are highlighted.

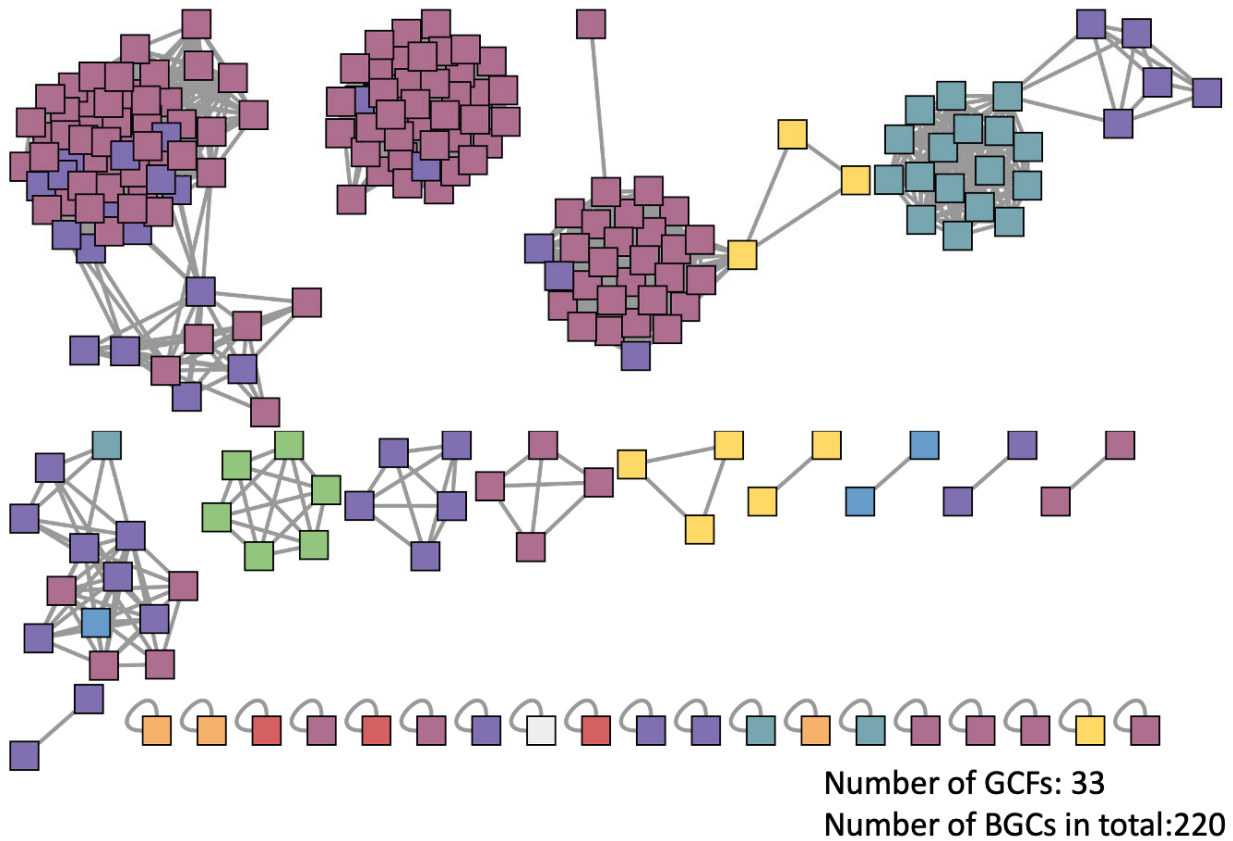

**Figure S8. RiPP networks and singletons.** All RiPP networks and singletons extracted from the BiG-SCAPE analysis shown in Fig. 3B.

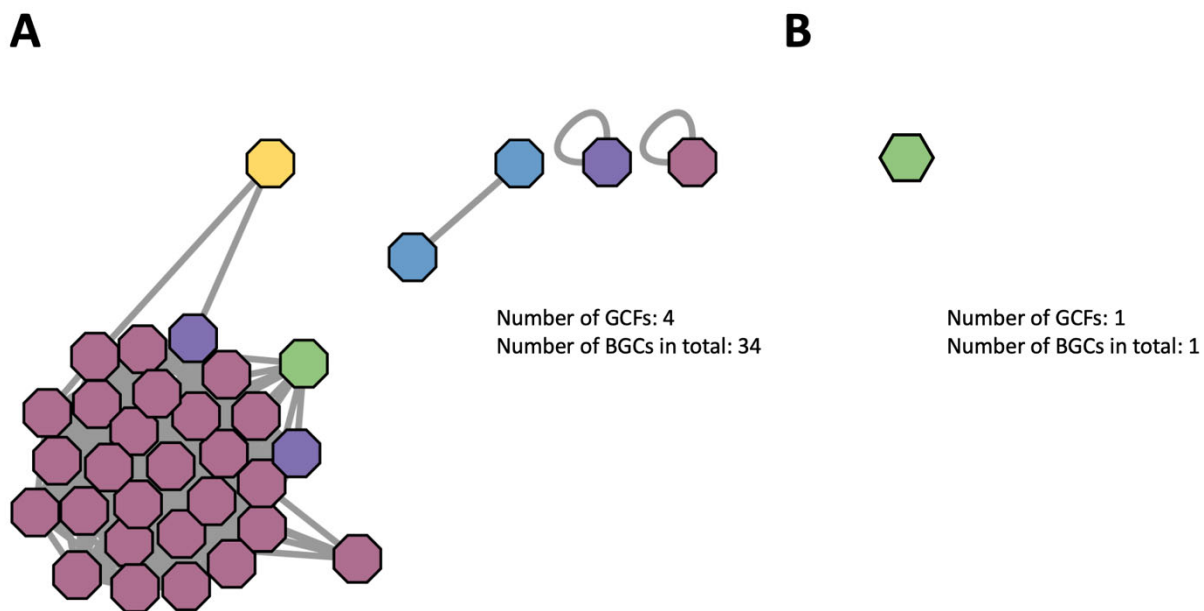

**Figure S9. PKS networks and singletons.** (A) Type I PKS, (B) type III PKS networks and singletons extracted from the BiG-SCAPE analysis shown in Fig. 3B.

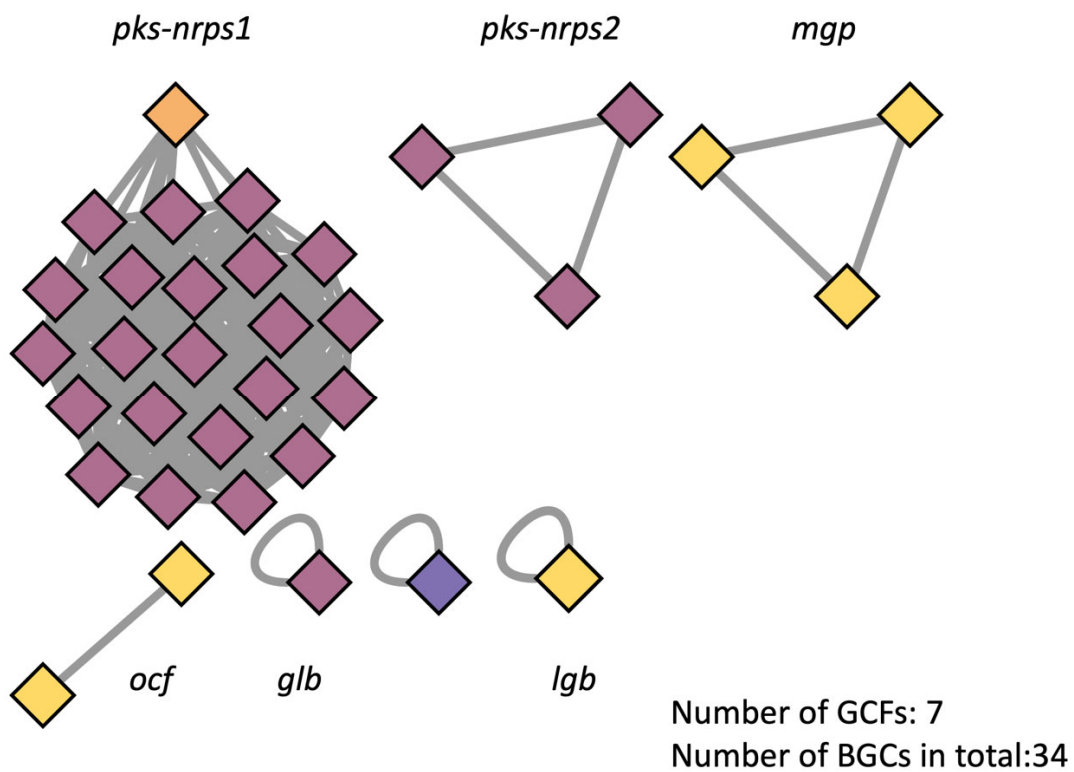

**Figure S10. Hybrid PKS-NRPS networks and singletons.** All PKS-NRPS networks and singletons extracted from the BiG-SCAPE analysis shown in Fig. 3B. The occidiofungin (*ocf*), glidobactin-like (*glb*), lagriamide B (*lgb*) and orphan networks are highlighted, including the *mgp* BGC studied here.

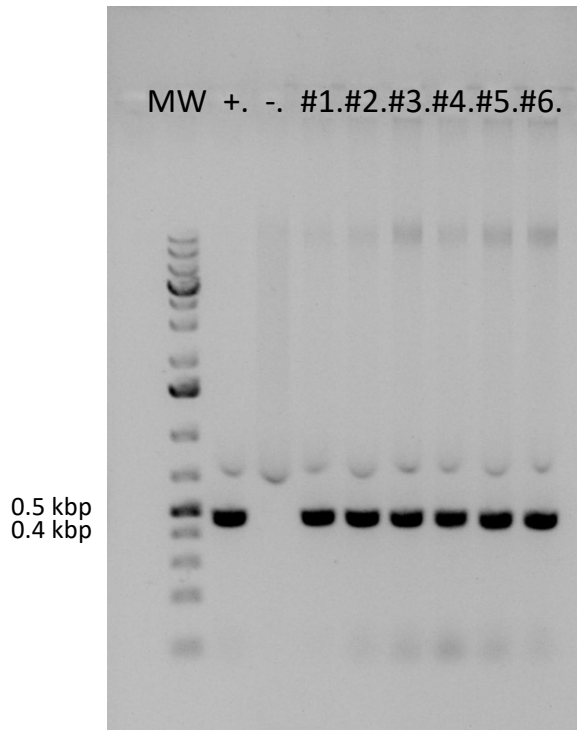

**Figure S11. pBS001 screening in *Burkholderia* sp. FERM BP-3421.** PCR analysis with primer pair (pBS001\_scpT7\_F/R). (+) positive control pBS001 plasmid; (-) negative control *Burkholderia* sp. FERM BP-3421 gDNA; (#1-6) tested exconjugant colonies of *Burkholderia* sp. FERM BP-3421  $\Delta fr9A$ .

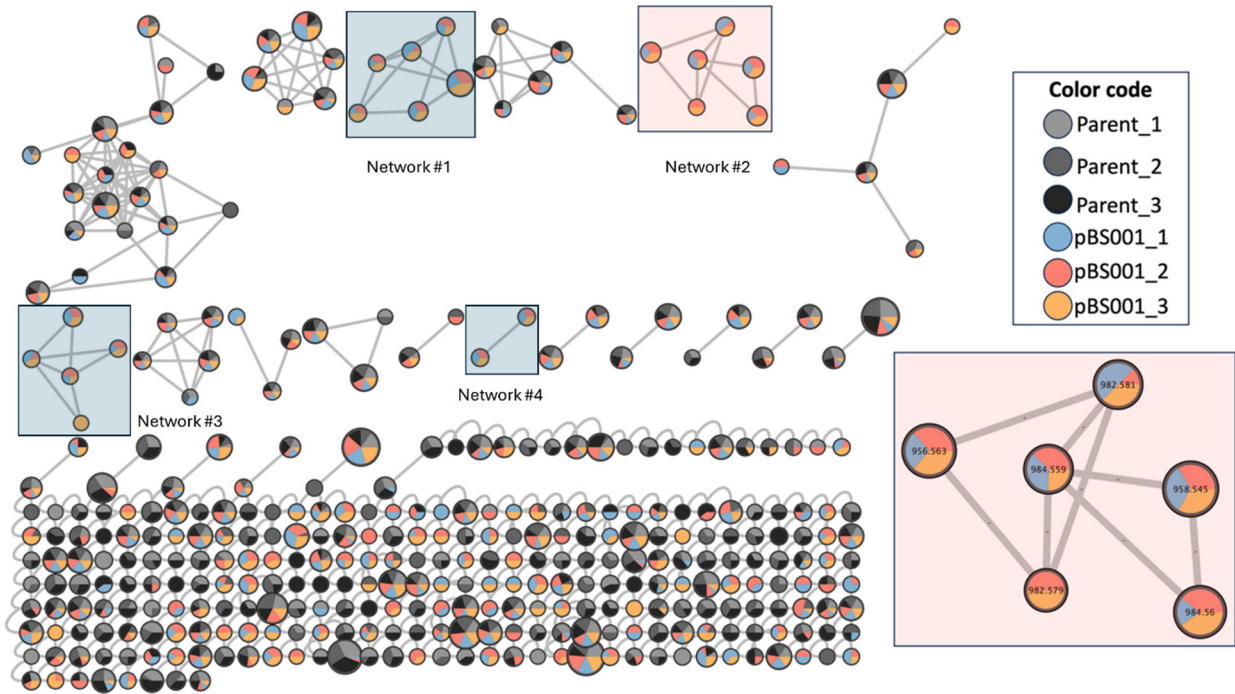

**Figure S12. Molecular Network for *Burkholderia* sp. FERM BP-3421/pBS001.** Nodes present in the parent strain containing the empty vector or in the strain containing the *mgp* BGC (pBS001) are color-coded. Four networks were detected only in strain carrying pBS001. The network #2 that we pursued is highlighted in a larger box. See Figures S13-S16 for details on all four networks.

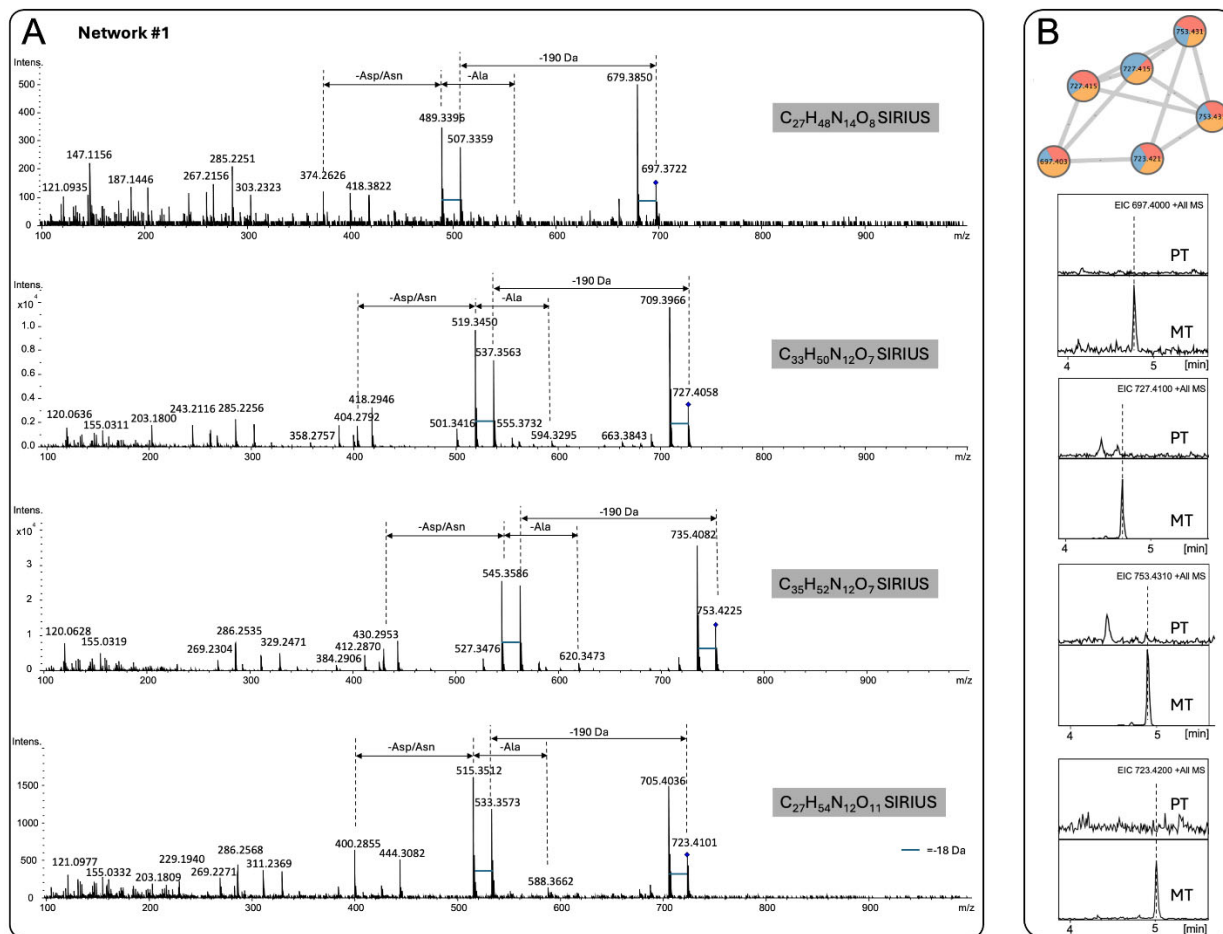

**Figure S13. MS analysis of network #1.** (A) MS2 spectra for nodes present in network #1 (Fig. S12). Neutral losses corresponding to Ala and Asp/Asn were observed. The molecular formulas predicted by SIRIUS v8.5.5 are indicated. No strong MS2 correlation with megapolipeptides MS2 were recognized suggesting a different compound. (B) Molecular network diagram (top) and extracted ion chromatograms (bottom) comparing parent type (PT) and mutant type (MT, carrying pBS001) strains showing detection of the  $m/z$  features exclusively in the MT extracts. Because the neutral losses for the amino acids were not the ones predicted from the *mgp* BGC, this network was deprioritized.



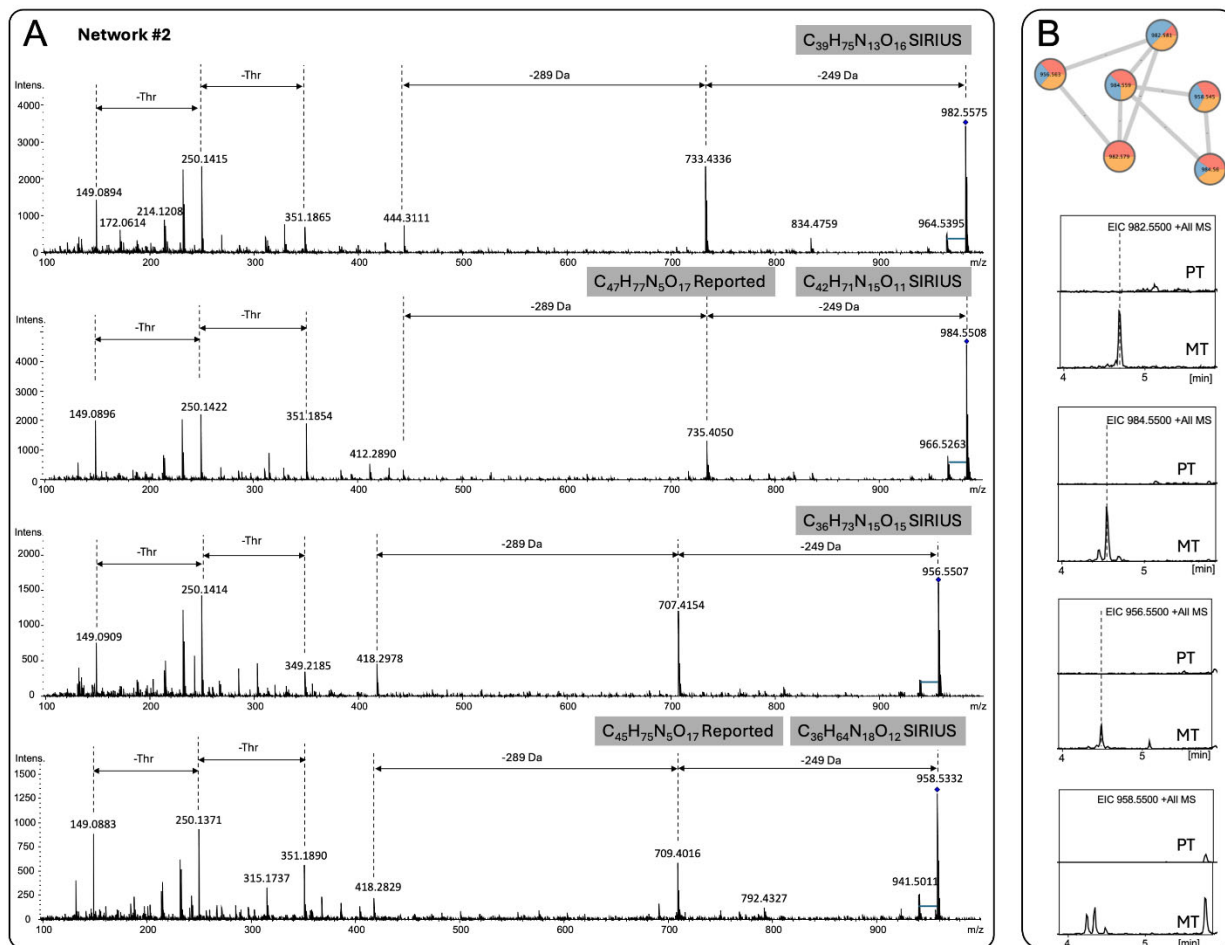

**Figure S14. MS analysis of network #2 (megapolipeptins network).** (A) MS2 spectra for nodes present in network #2 (Fig. S12). Neutral losses corresponding to 2 Thr residues (101 Da) were observed. The molecular formulas predicted by SIRIUS v8.5.5 and the ones we report here are indicated. (B) Molecular network diagram (top) and extracted ion chromatograms (bottom) comparing parent type (PT) and mutant type (MT, carrying pBS001) strains showing detection of the  $m/z$  features exclusively in the MT extracts. The same parent  $m/z$  features were observed by Zheng *et al.* (2020) after promoter replacement of a similar BGC (92% identity to *mgp*) from a different *P. megapolitana* strain<sup>20</sup>.

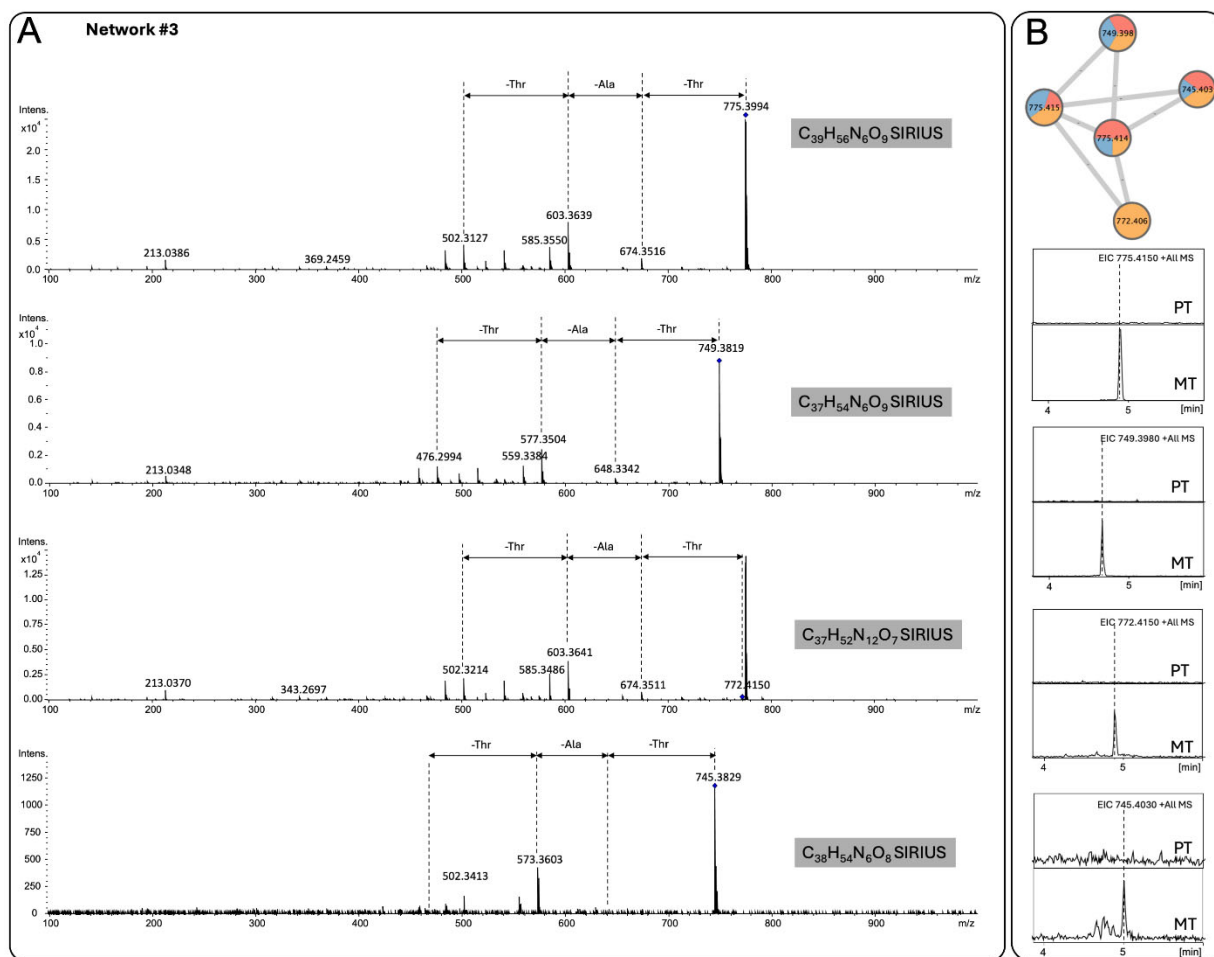

**Figure S15. MS analysis of network #3.** (A) MS2 spectra for nodes present in network #3 (Fig. S12). Neutral losses corresponding to 101 Da (Thr), 71 Da (Ala), followed by 101 Da (Thr) were observed. The molecular formulas predicted by SIRIUS v8.5.5 are indicated. (B) Molecular network diagram (top) and extracted ion chromatograms (bottom) comparing parent type (PT) and mutant type (MT, carrying pBS001) strains showing detection of the  $m/z$  features exclusively in the MT extracts. Although Thr neutral loss is also observed for the megapolipeptins they were not sequential for this compound family so that network 3 is likely unrelated to megapolipeptins.

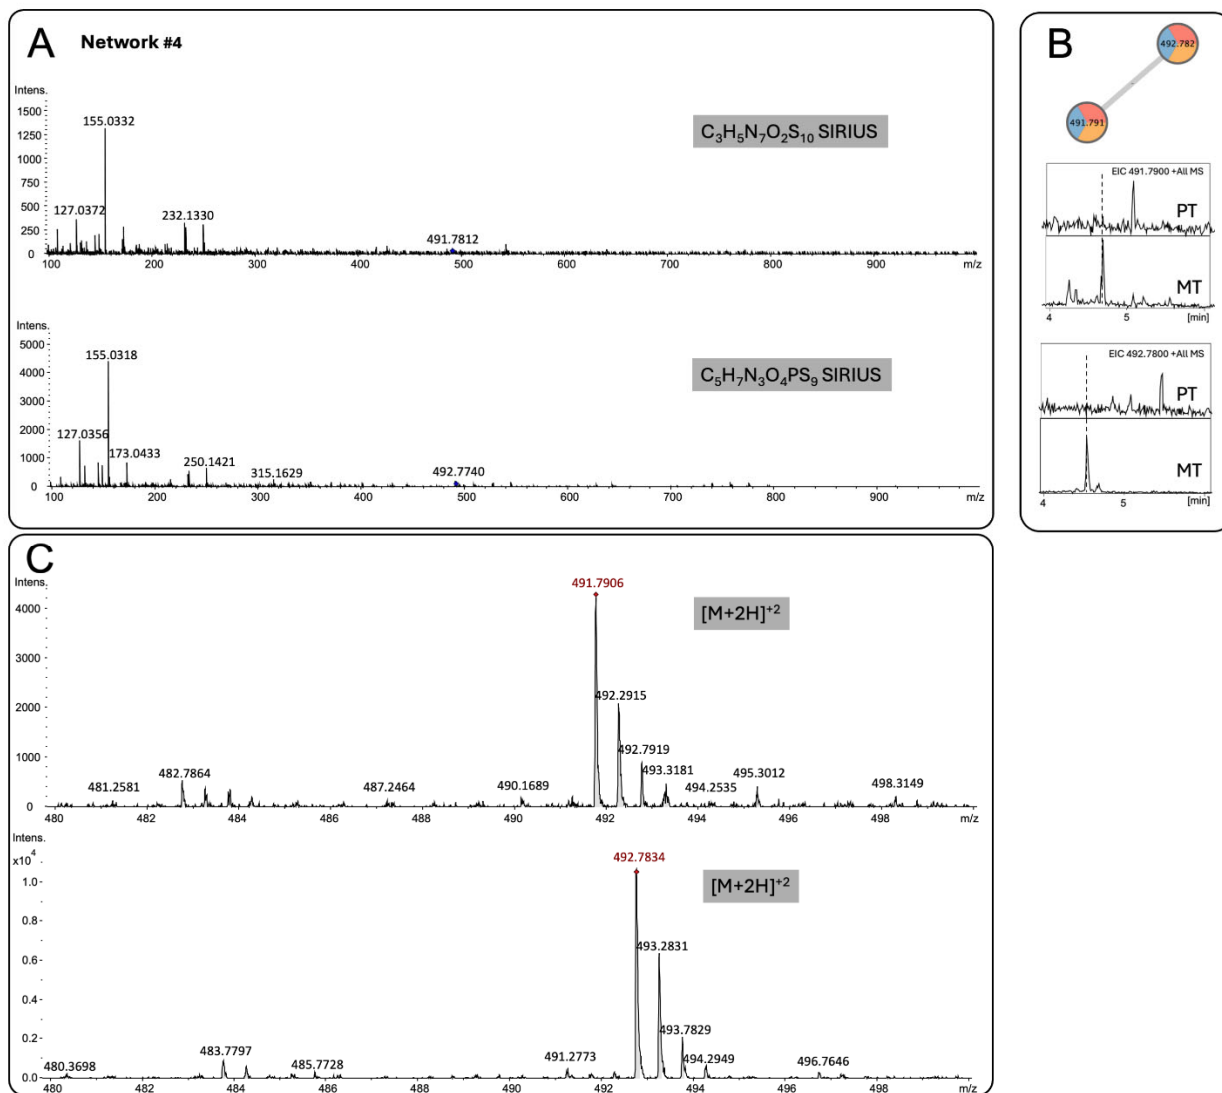

**Figure S16. MS analysis of network #4.** (A) MS2 spectra for nodes present in network #4 (Fig. S12). The molecular formulas predicted by SIRIUS v8.5.5 are indicated. (B) Molecular network diagram (top) and extracted ion chromatograms (bottom) comparing parent type (PT) and mutant type (MT, carrying pBS001) strains showing detection of the  $m/z$  features exclusively in the MT extracts. (C) Isotope pattern of the observed features indicating that they are doubly charged species. Note that SIRIUS only works with singly charged precursors, giving inaccurate predictions for doubly charged features. This network likely represents doubly charged megapolypeptins.

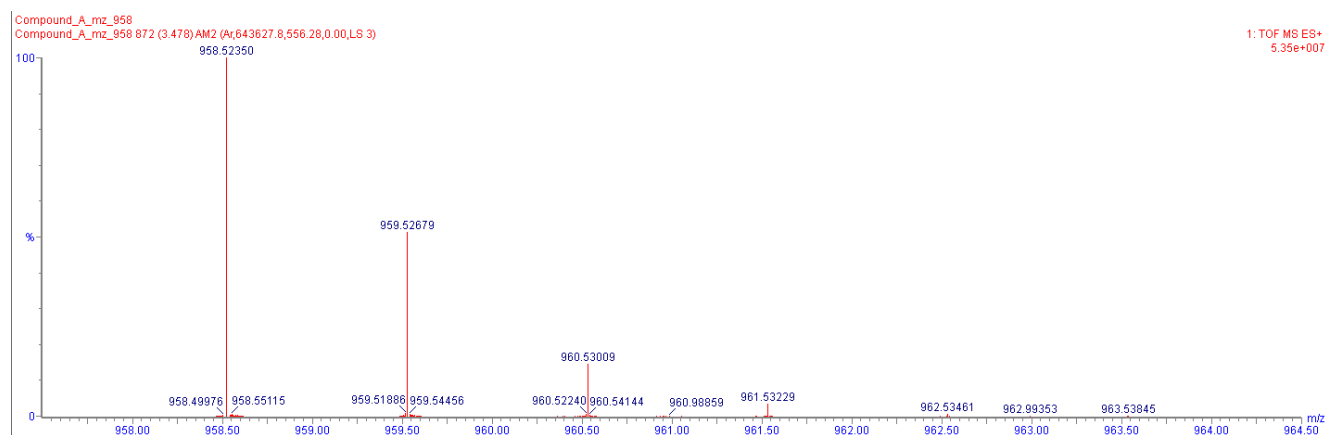

Figure S17. HR-ESI-MS data for megapolipeptin A (1).

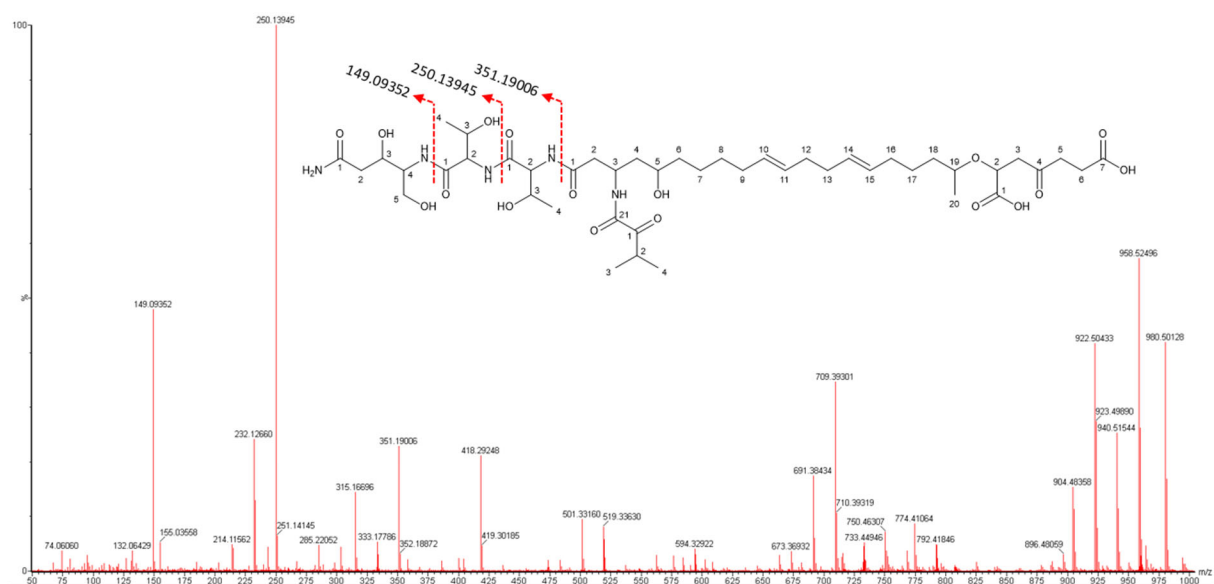

Figure S18. MS/MS data for megapolipeptin A (1).

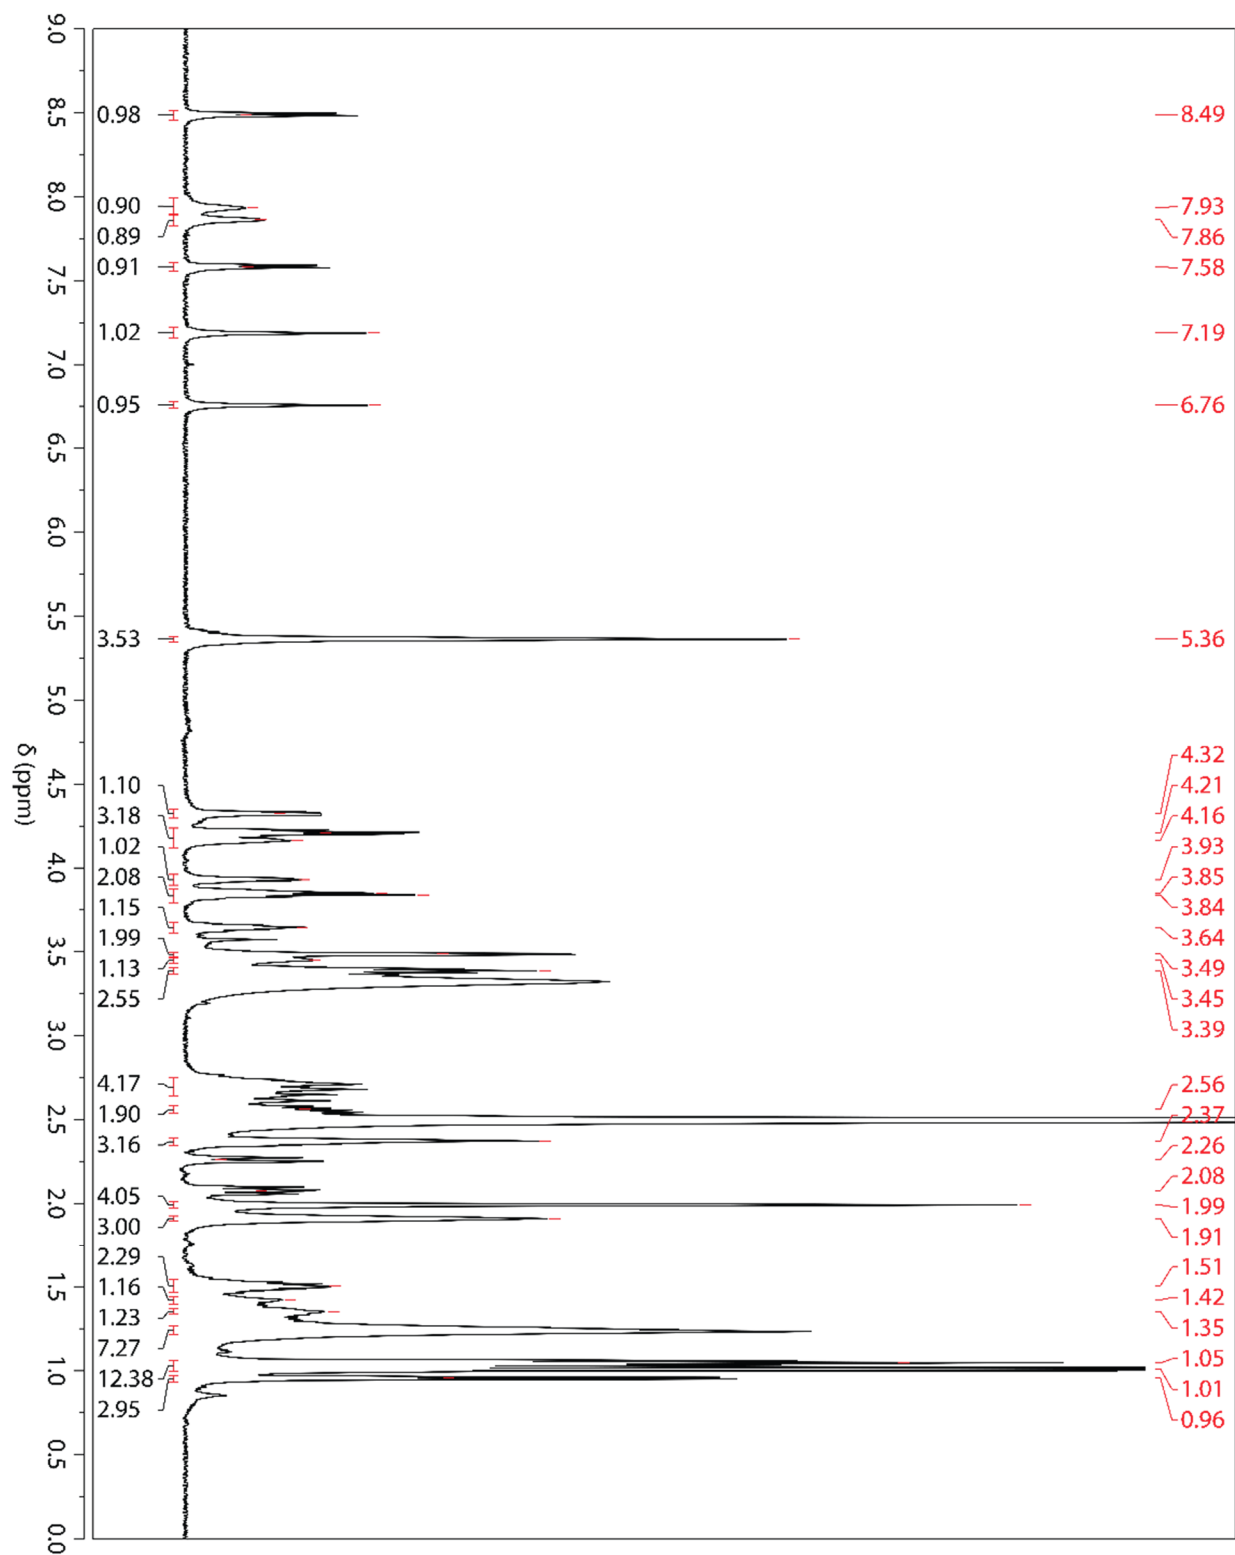

Figure S19. <sup>1</sup>H NMR spectrum of megapolipeptin A (1) acquired in DMSO-*d*<sub>6</sub> at 600 MHz.

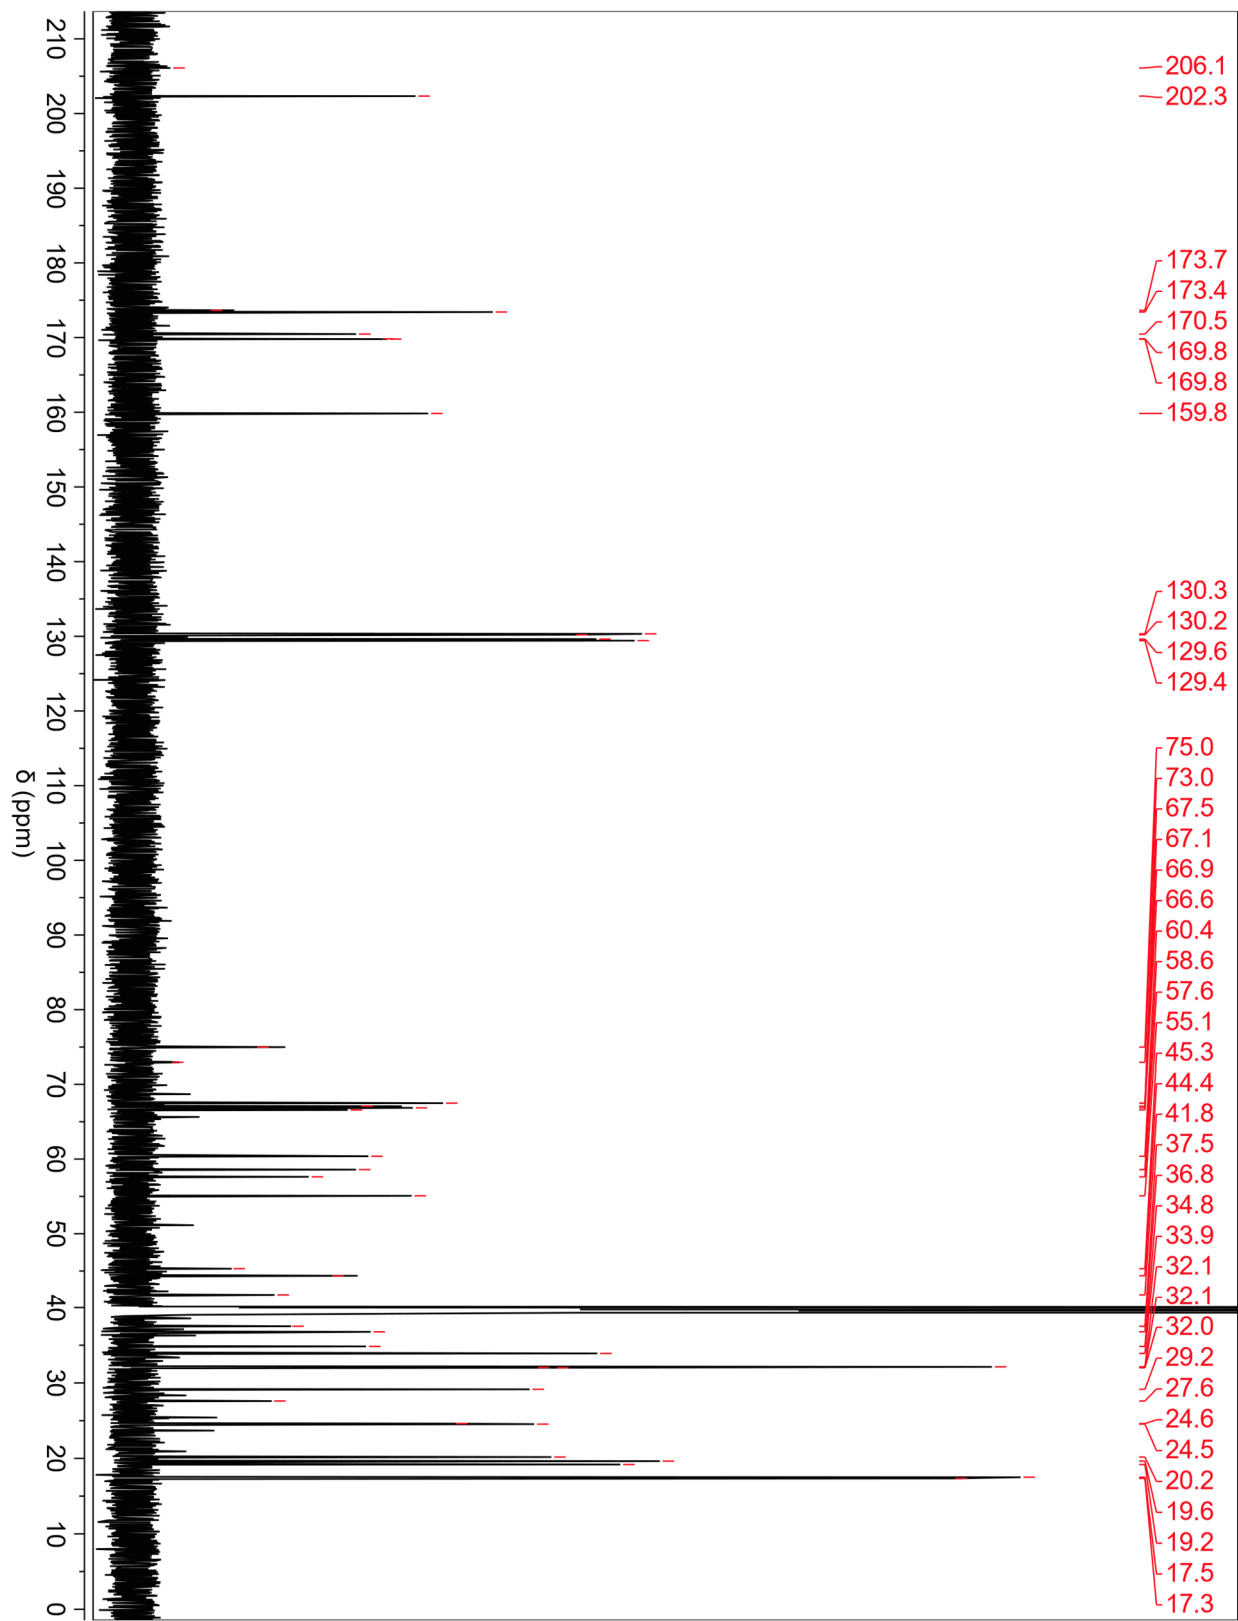

Figure S20.  $^{13}\text{C}$  NMR spectrum of megapolipeptin A (1) acquired in  $\text{DMSO-}d_6$  at 150 MHz.

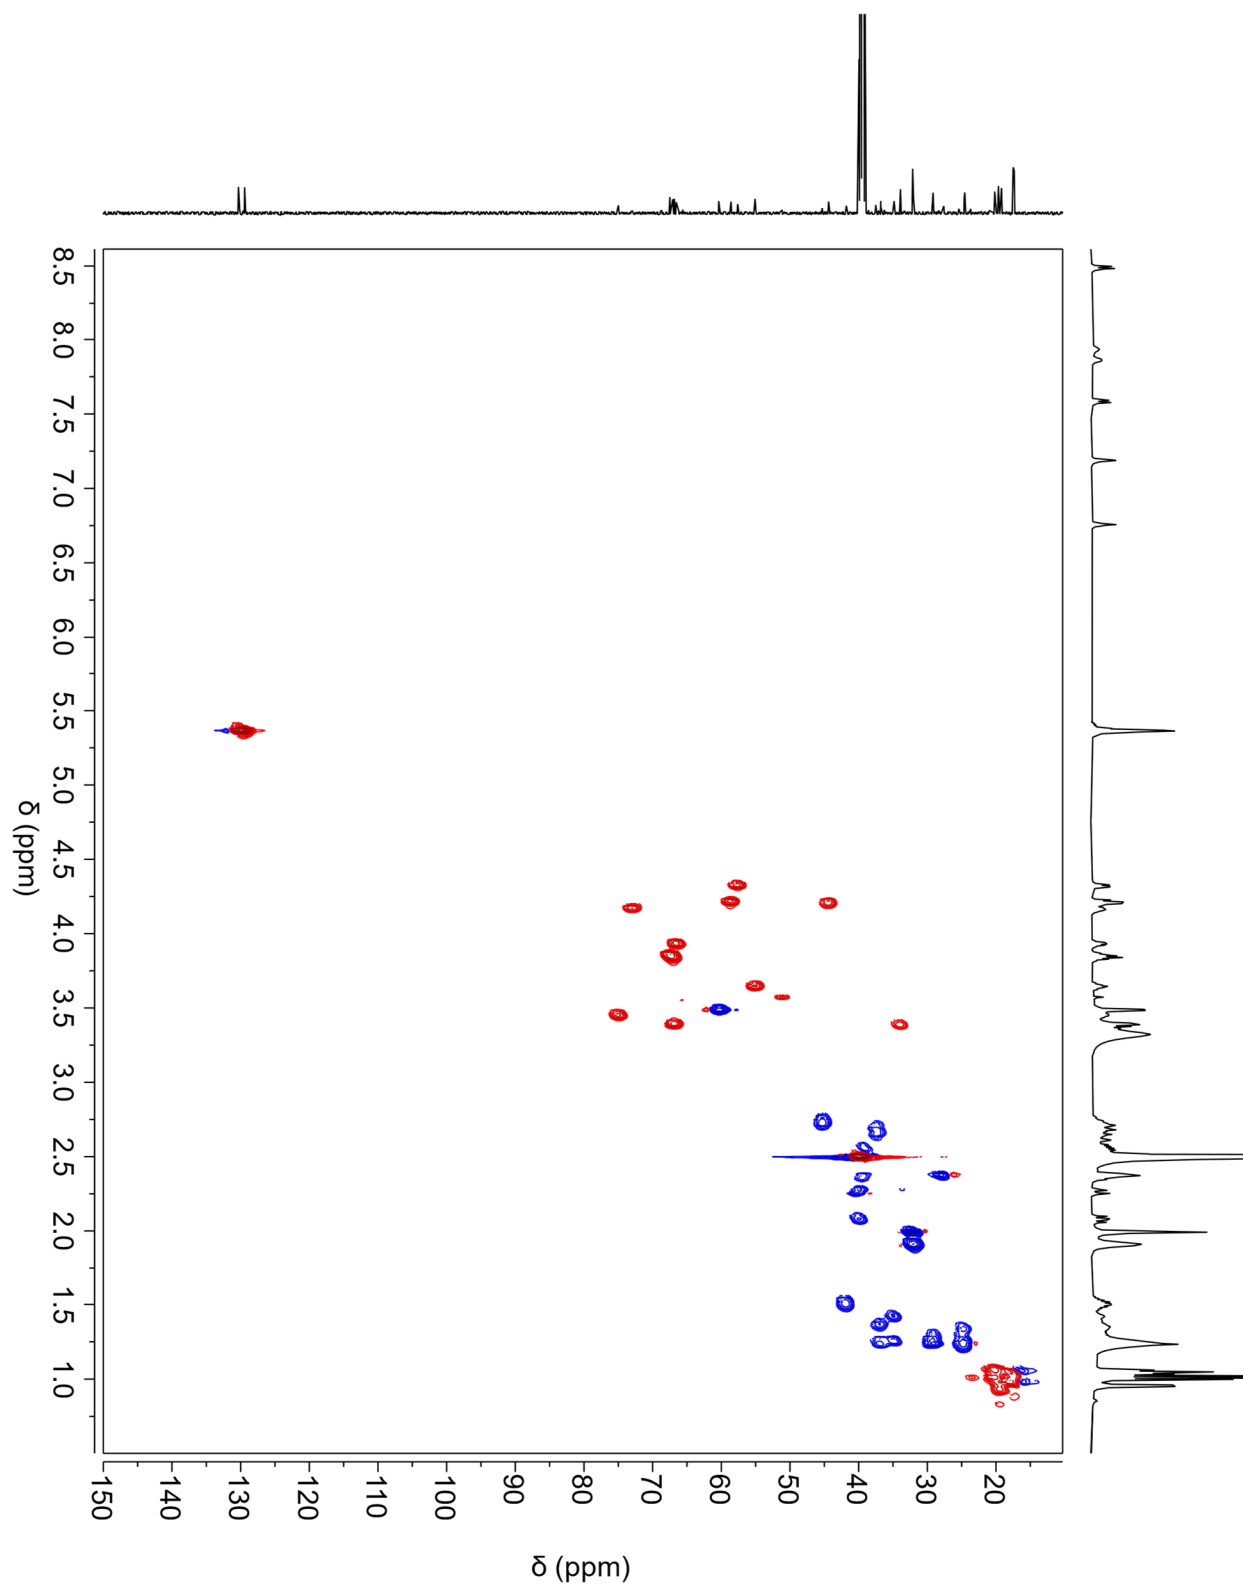

Figure S21. HSQC spectrum of megapolipeptin A (1) acquired in  $\text{DMSO-}d_6$  at 600 MHz.

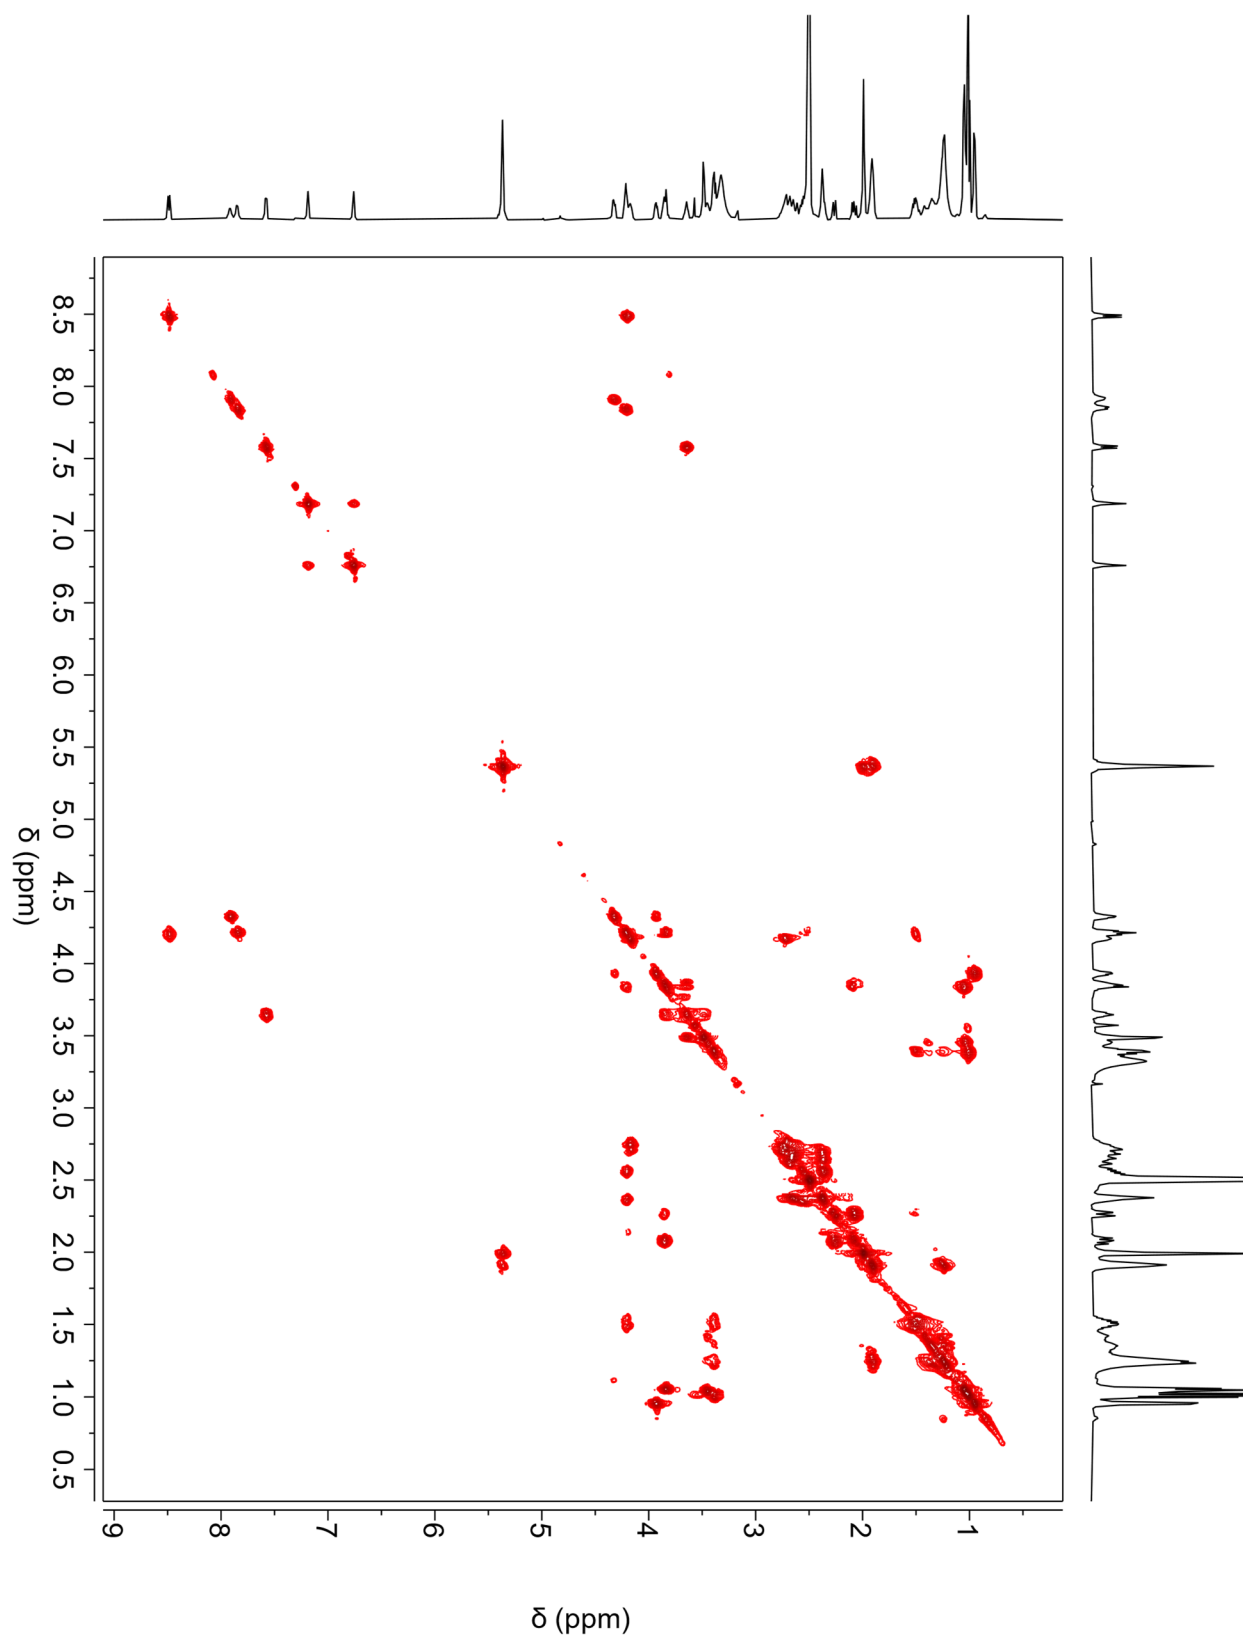

**Figure S22.**  $^1\text{H}$ - $^1\text{H}$  COSY spectrum of megapolipeptin A (1) acquired in  $\text{DMSO-}d_6$  at 600 MHz.



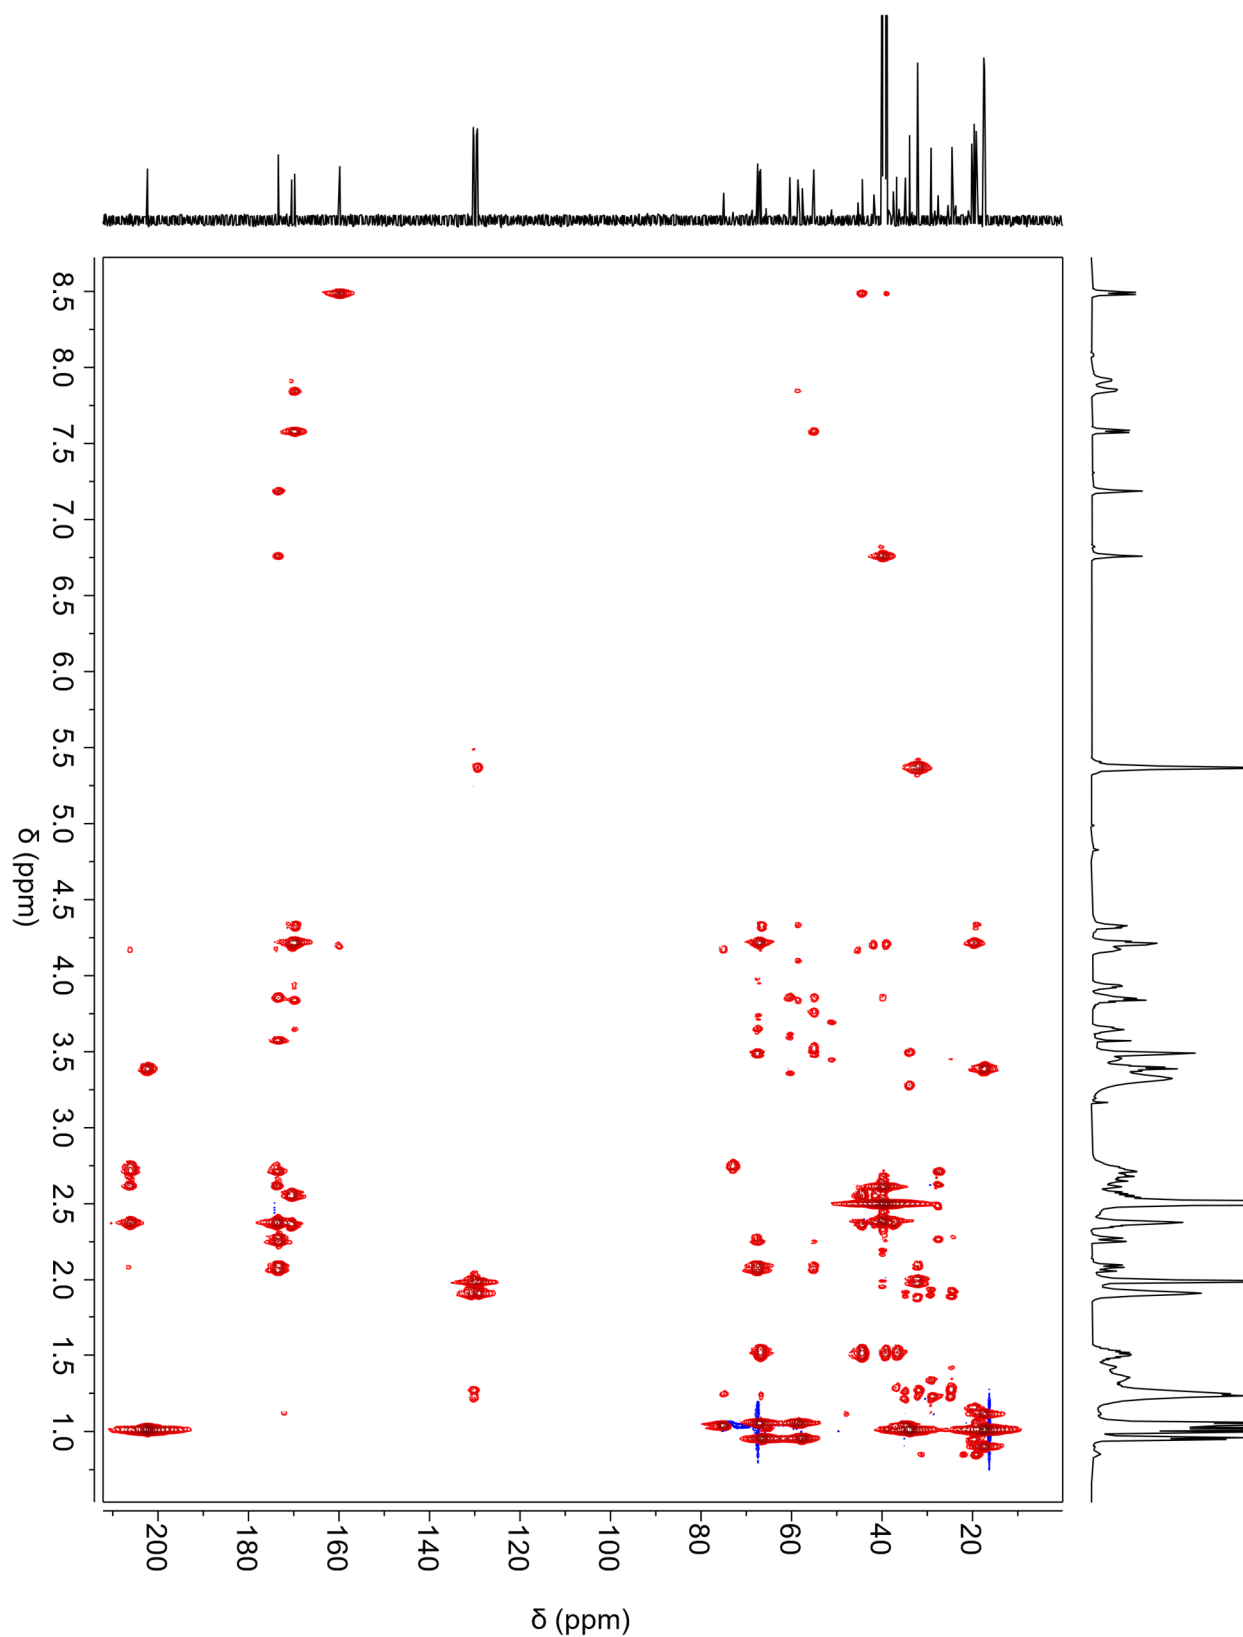

Figure S23. HMBC spectrum of megapolipeptin A (1) acquired in  $\text{DMSO-}d_6$  at 600 MHz.

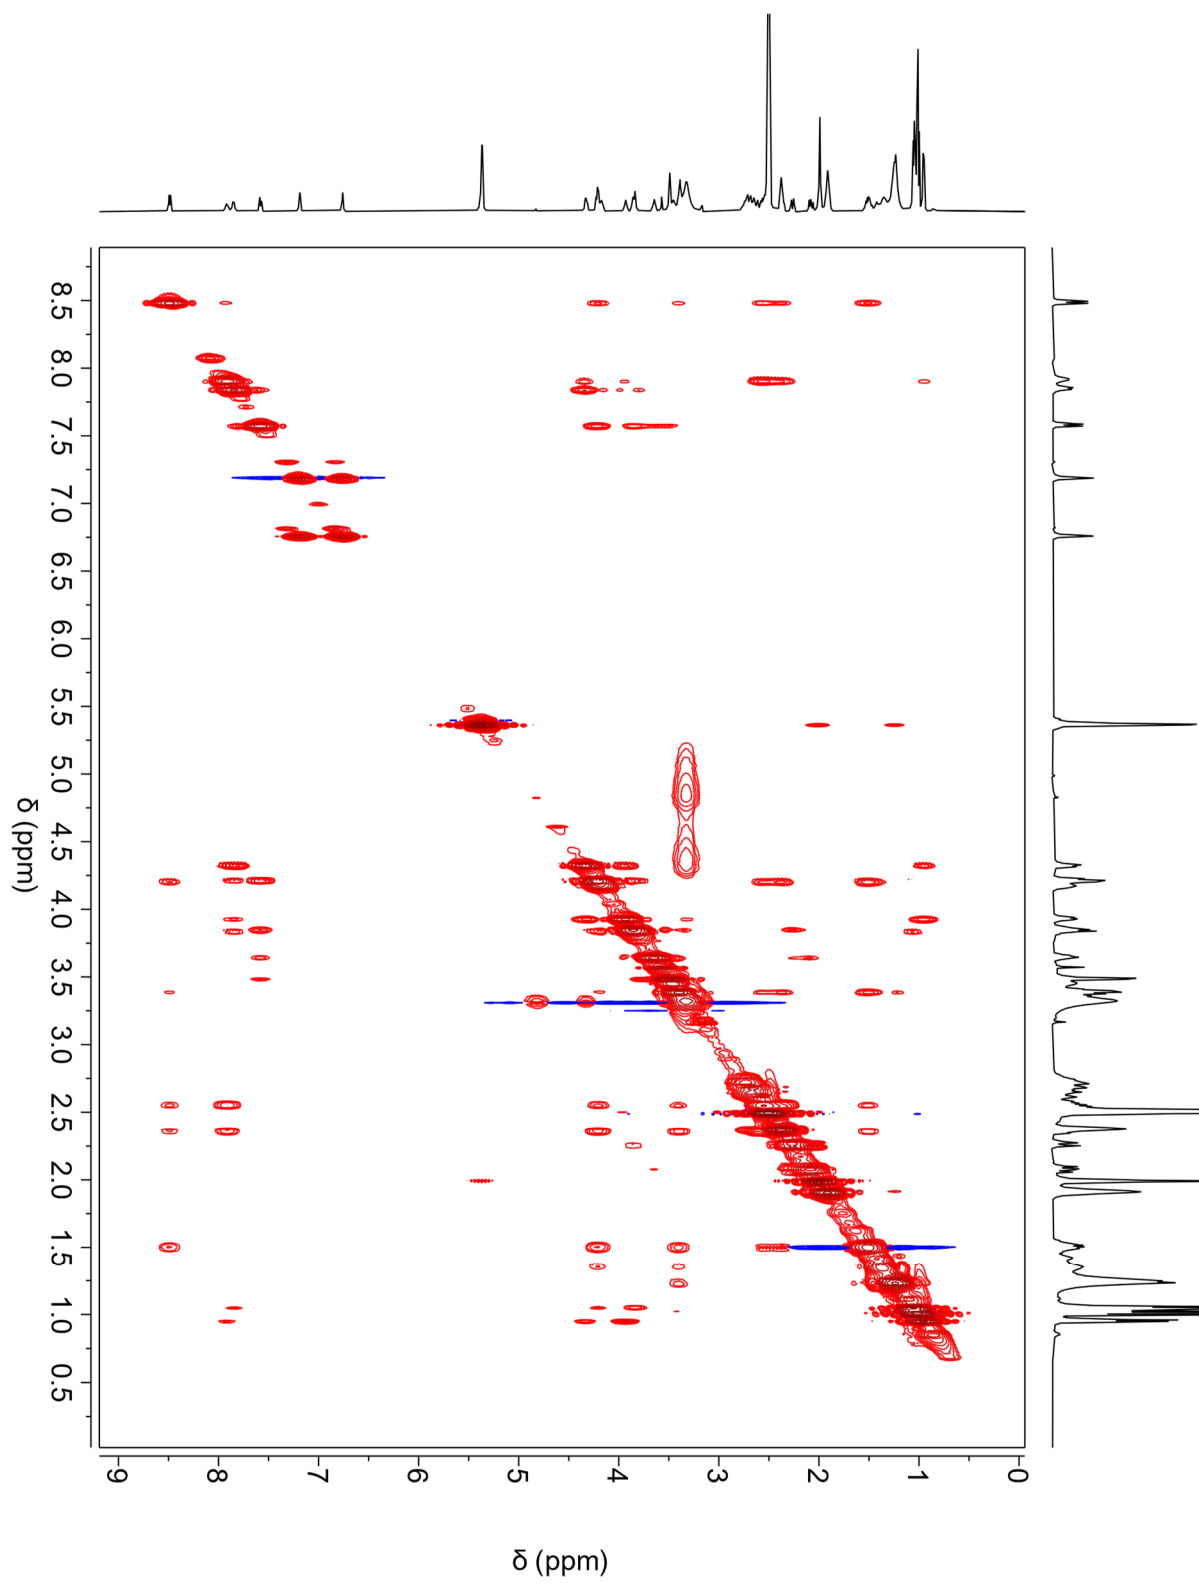

**Figure S24.** NOESY spectrum of megapolipeptin A (1) acquired in DMSO- $d_6$  at 600 MHz.

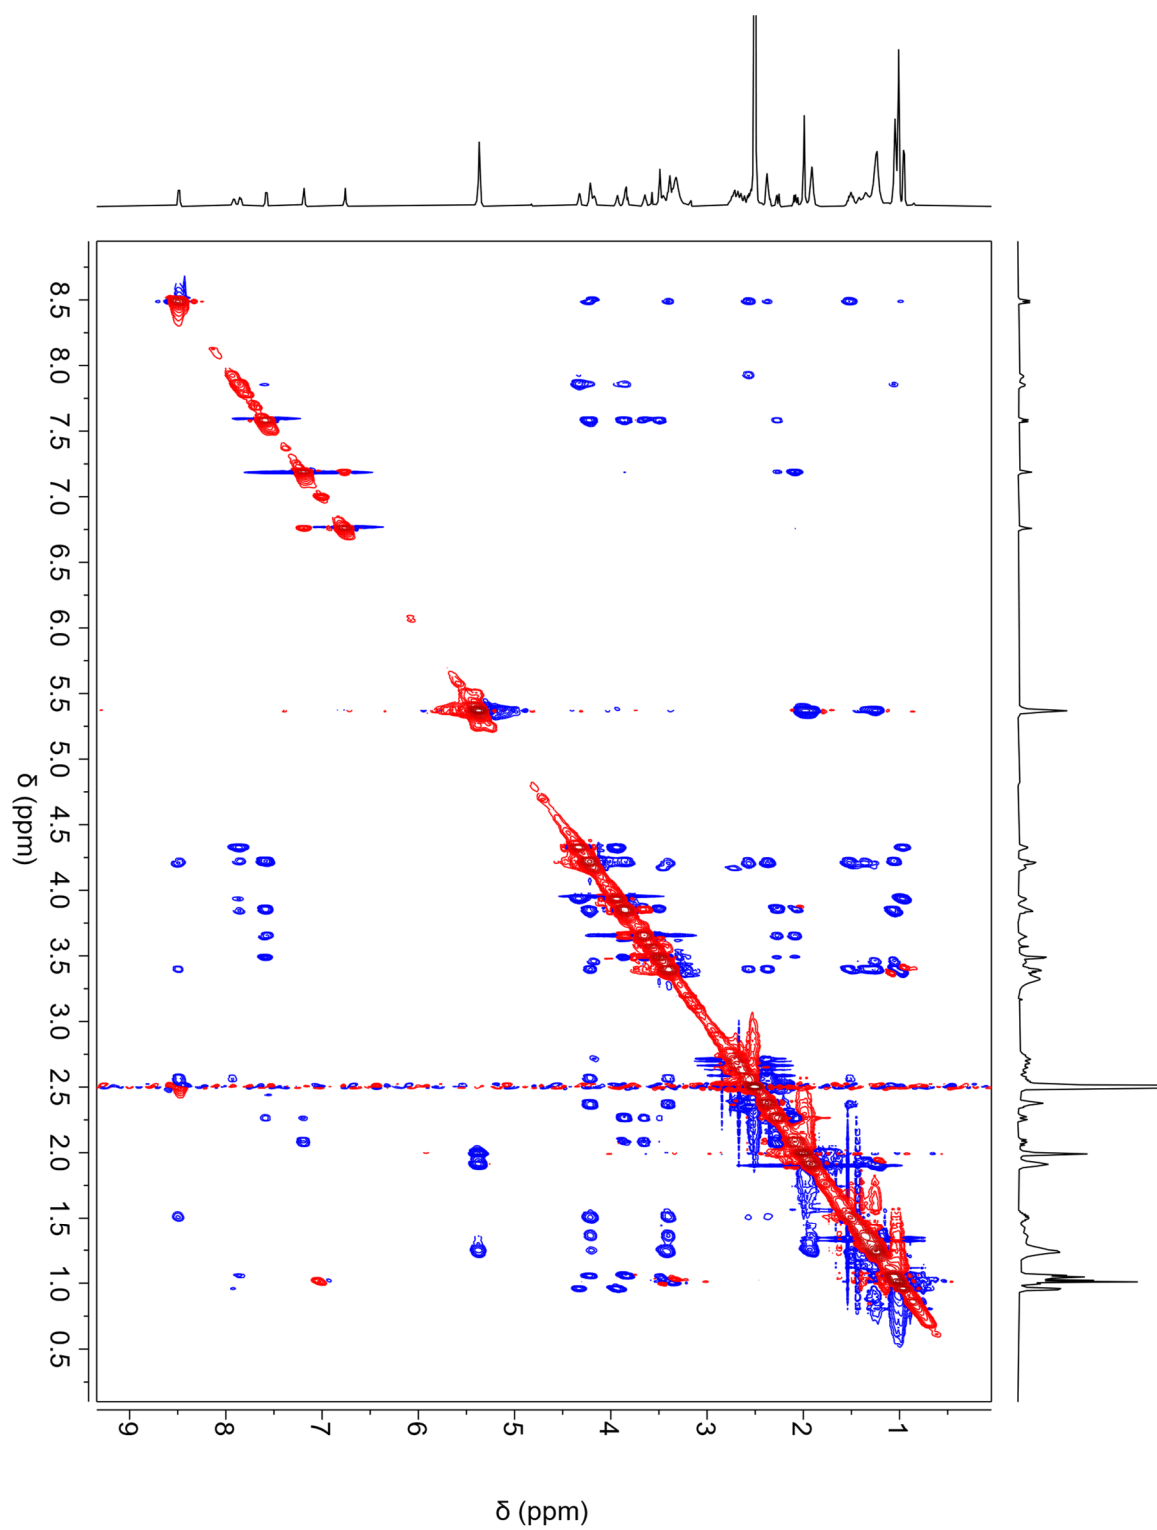

Figure S25. ROESY spectrum of megapolipectin A (1) acquired in DMSO-*d*<sub>6</sub> at 600 MHz.

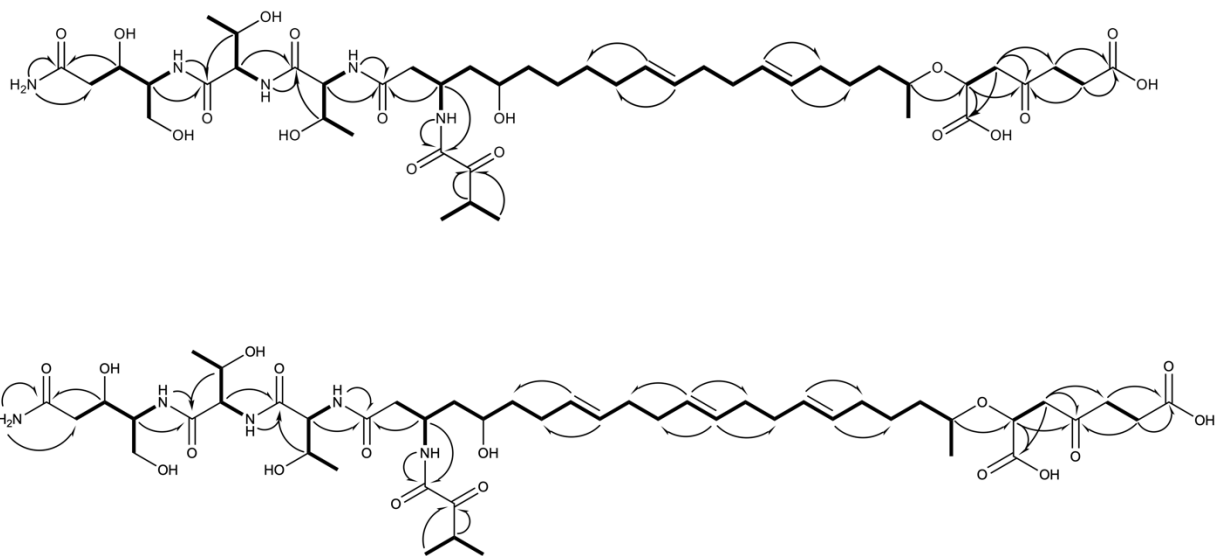

**Figure S26. Key COSY (bold lines) and HMBC (arrows) correlations for the planar structures of megapolipeptin A (1) and megapolipeptin B (2).**

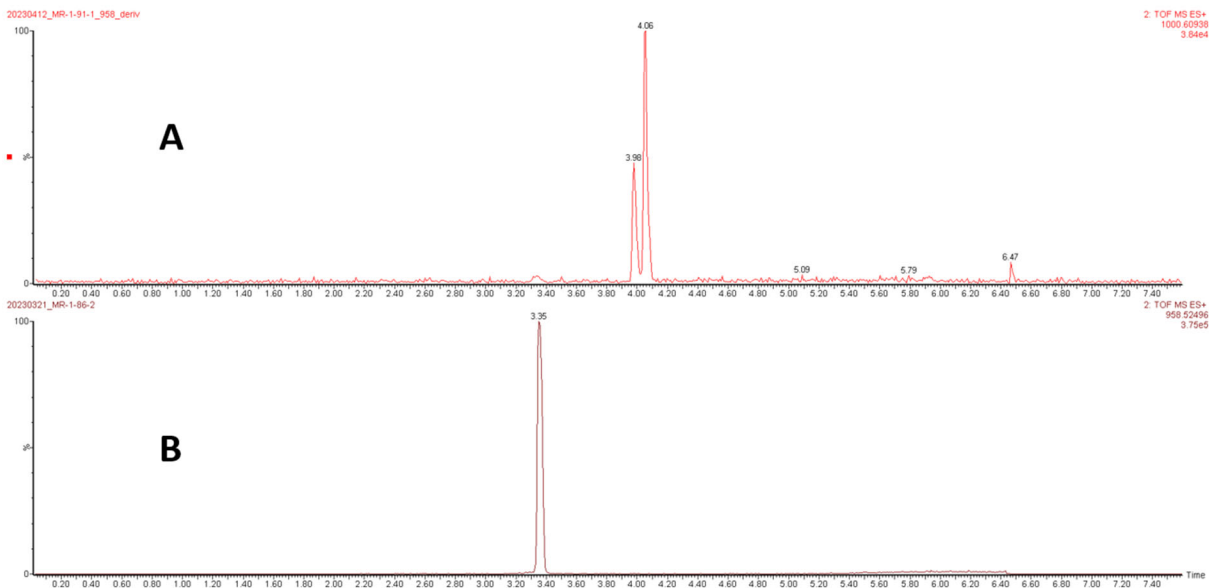

**Figure S27. Comparative Extracted Ion Chromatograms of megapolipectin A (1) and methyl ester derivatives. (A) EIC of the megapolipectin A (1) methyl ester derivatives. Two products were observed and isolated by HPLC. (B) EIC of purified megapolipectin A (1).**

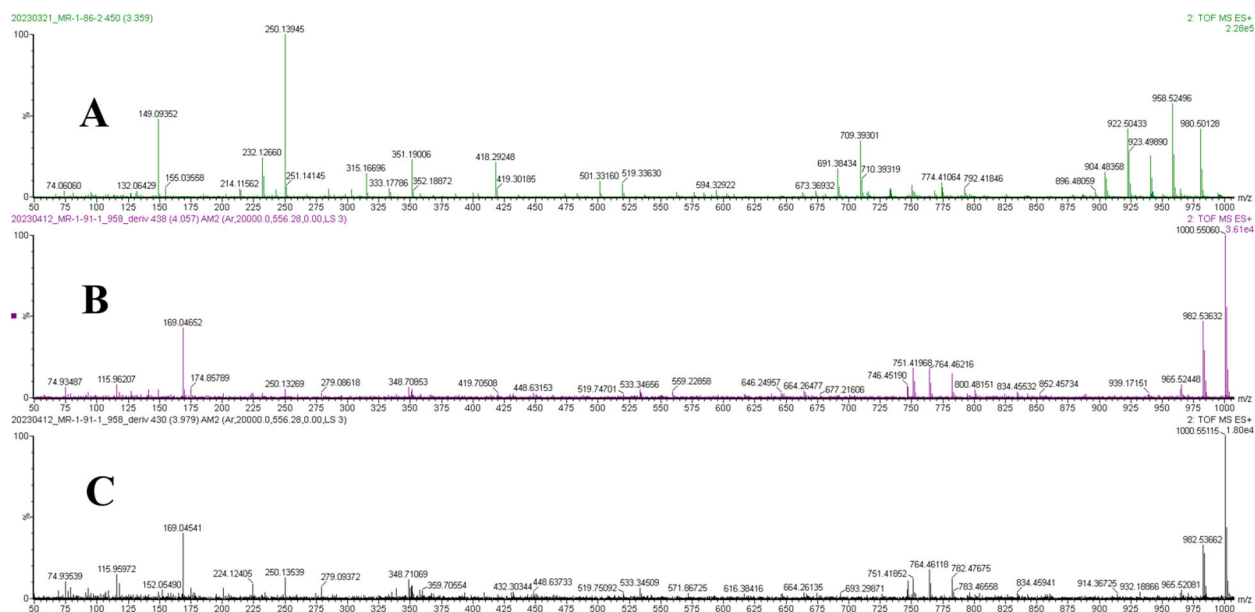

**Figure S28. Comparative MS spectra of megapolipectin A (1) and methyl ester derivatives. (A) megapolipectin A (1). (B) and (C) The two megapolipectin A (1) methyl ester derivatives (B:  $t_R$  4.06 min; C:  $t_R$  3.98 min).**

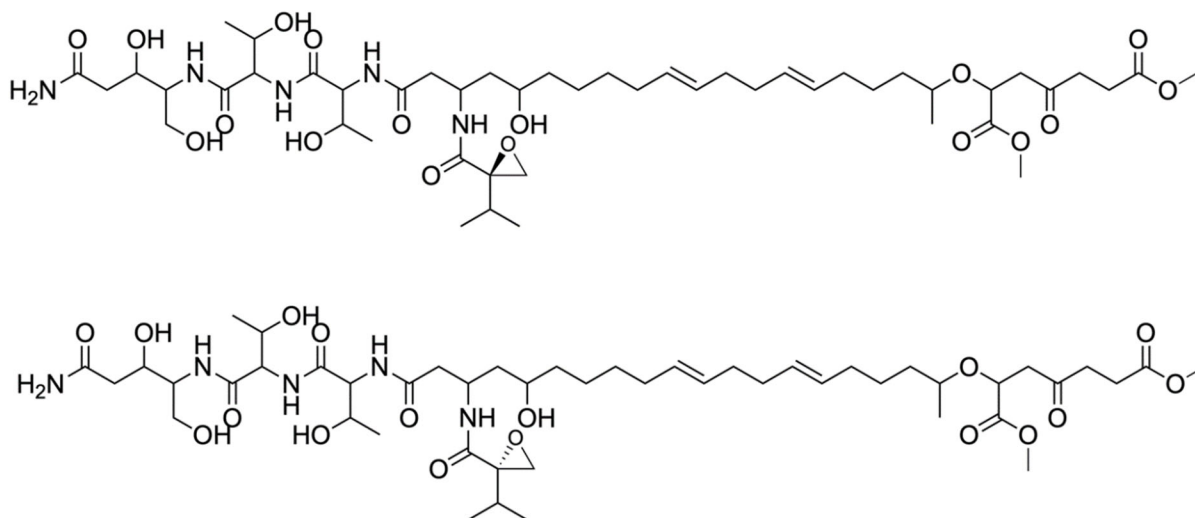

**Figure S29. Planar structures of the megapolipeptin A (1) methyl ester derivatives (3 and 4).**

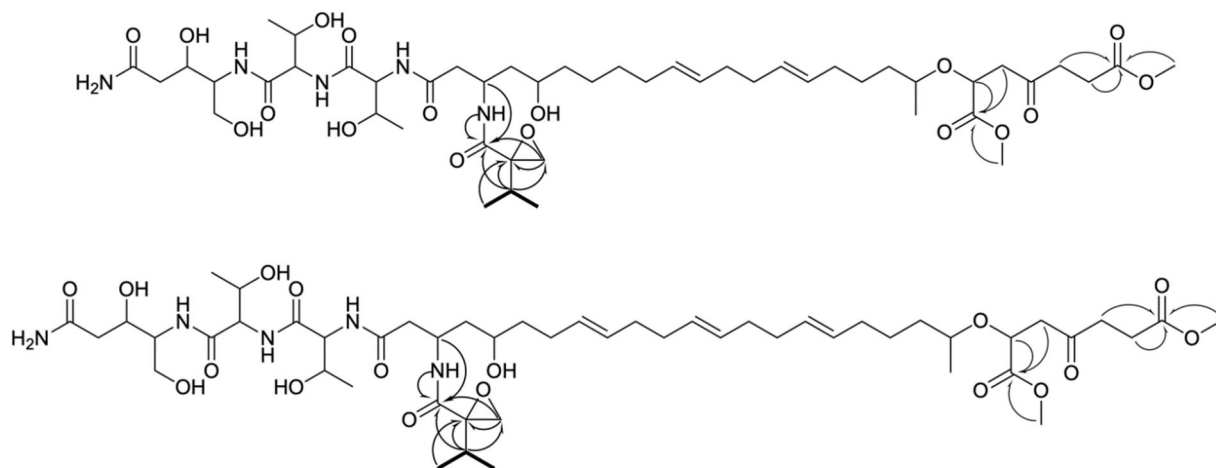

**Figure S30. Key COSY and HMBC correlations of the methylated planar structures of megapolipeptin A (1) methyl ester (3) and B methyl ester (4).**

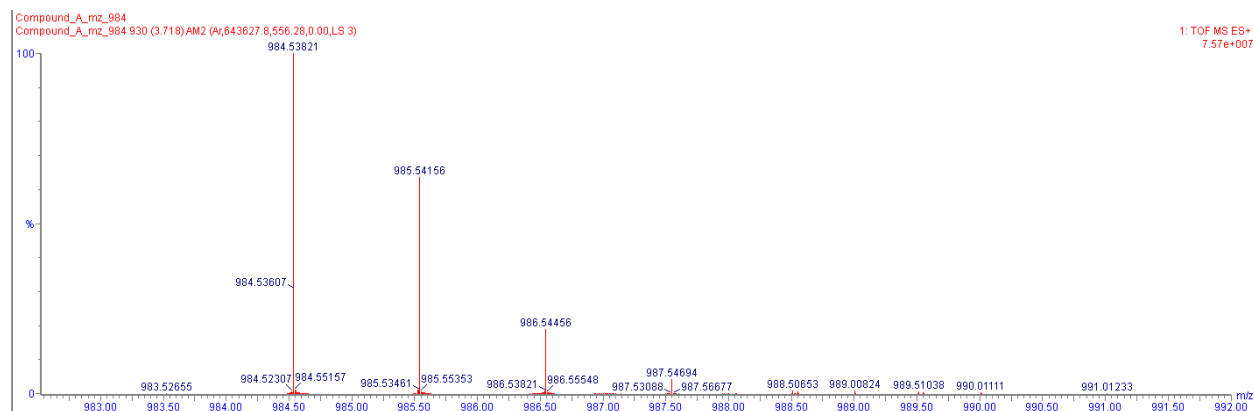

**Figure S31. HR-ESI-MS data for megapolipeptin B (2).**

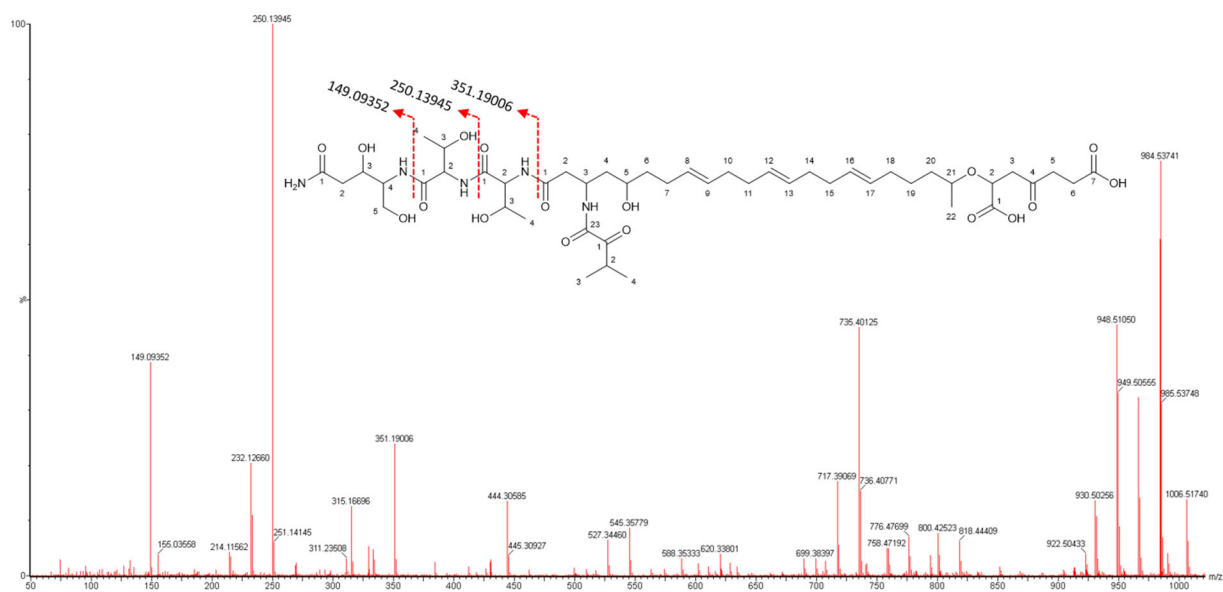

**Figure S32. MS/MS data for megapolipeptin B (2).**

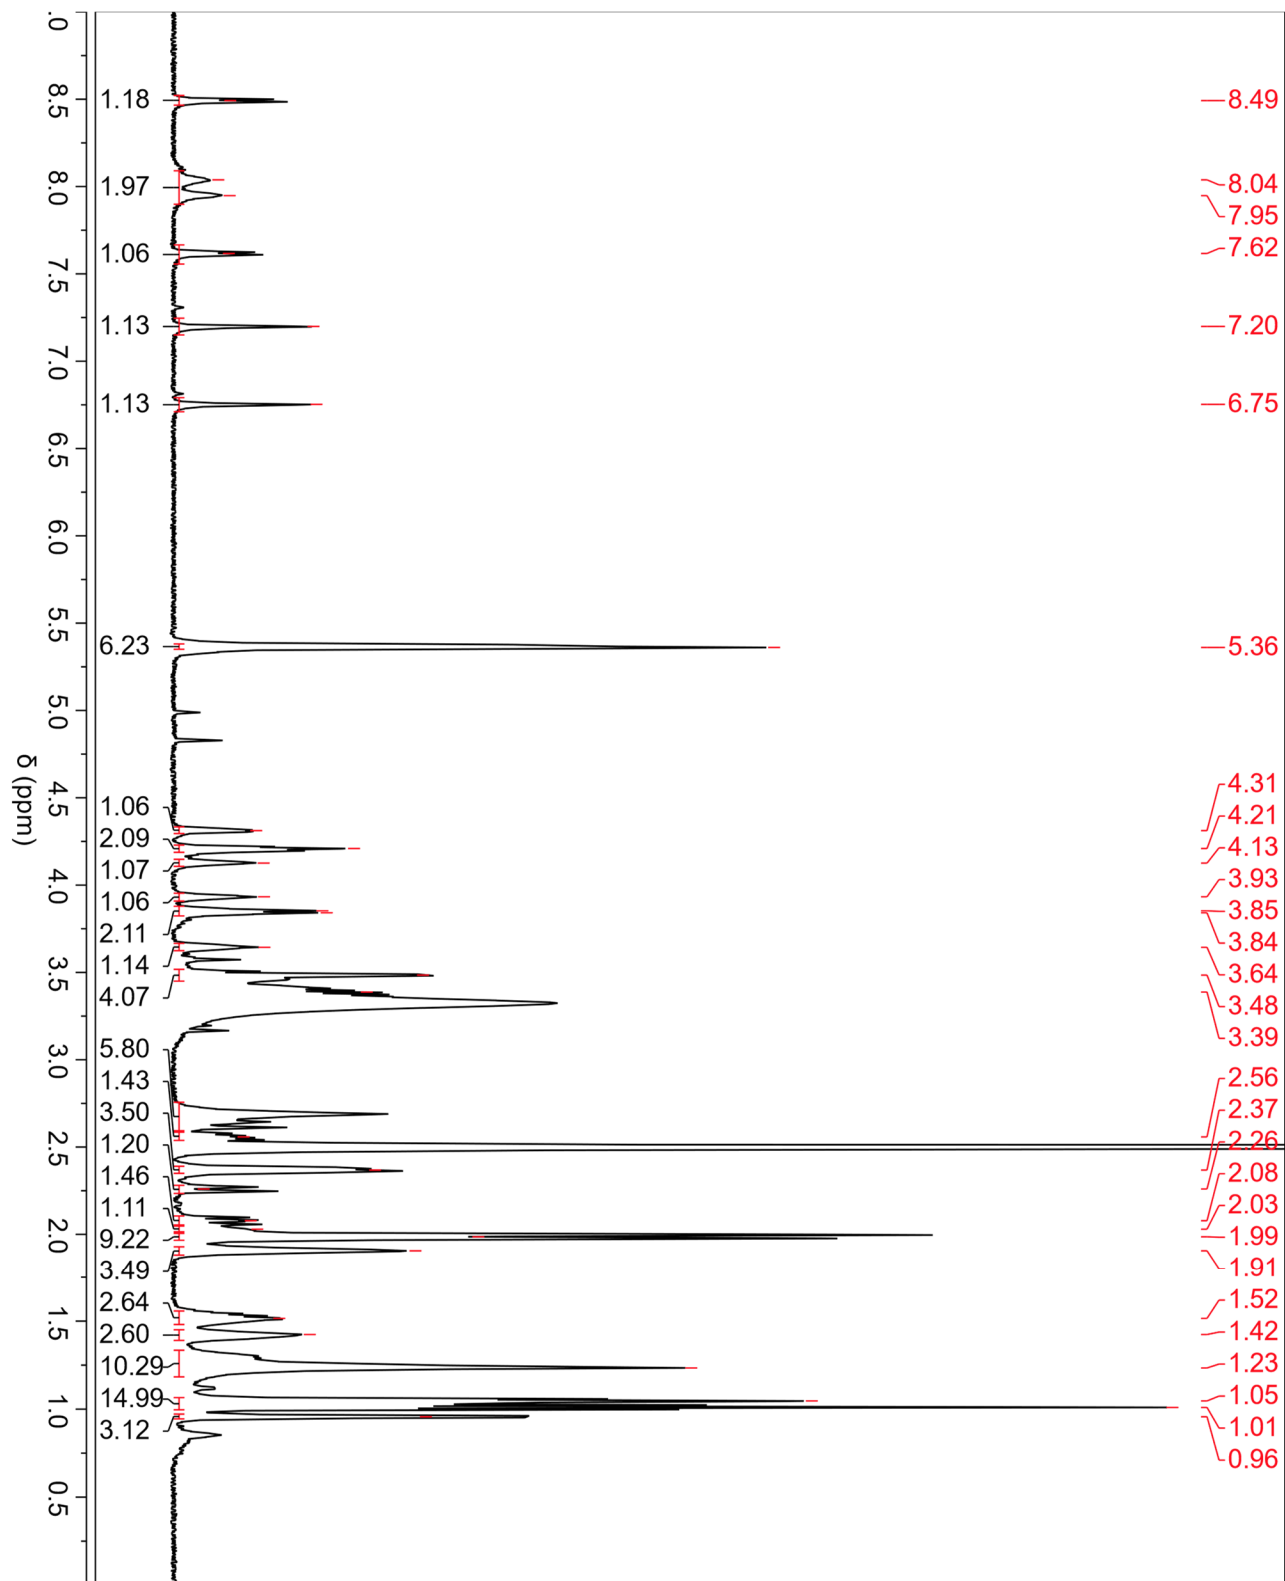

Figure S33.  $^1\text{H}$  NMR spectrum of megapolipeptin B (2) acquired in  $\text{DMSO-}d_6$  at 600 MHz.



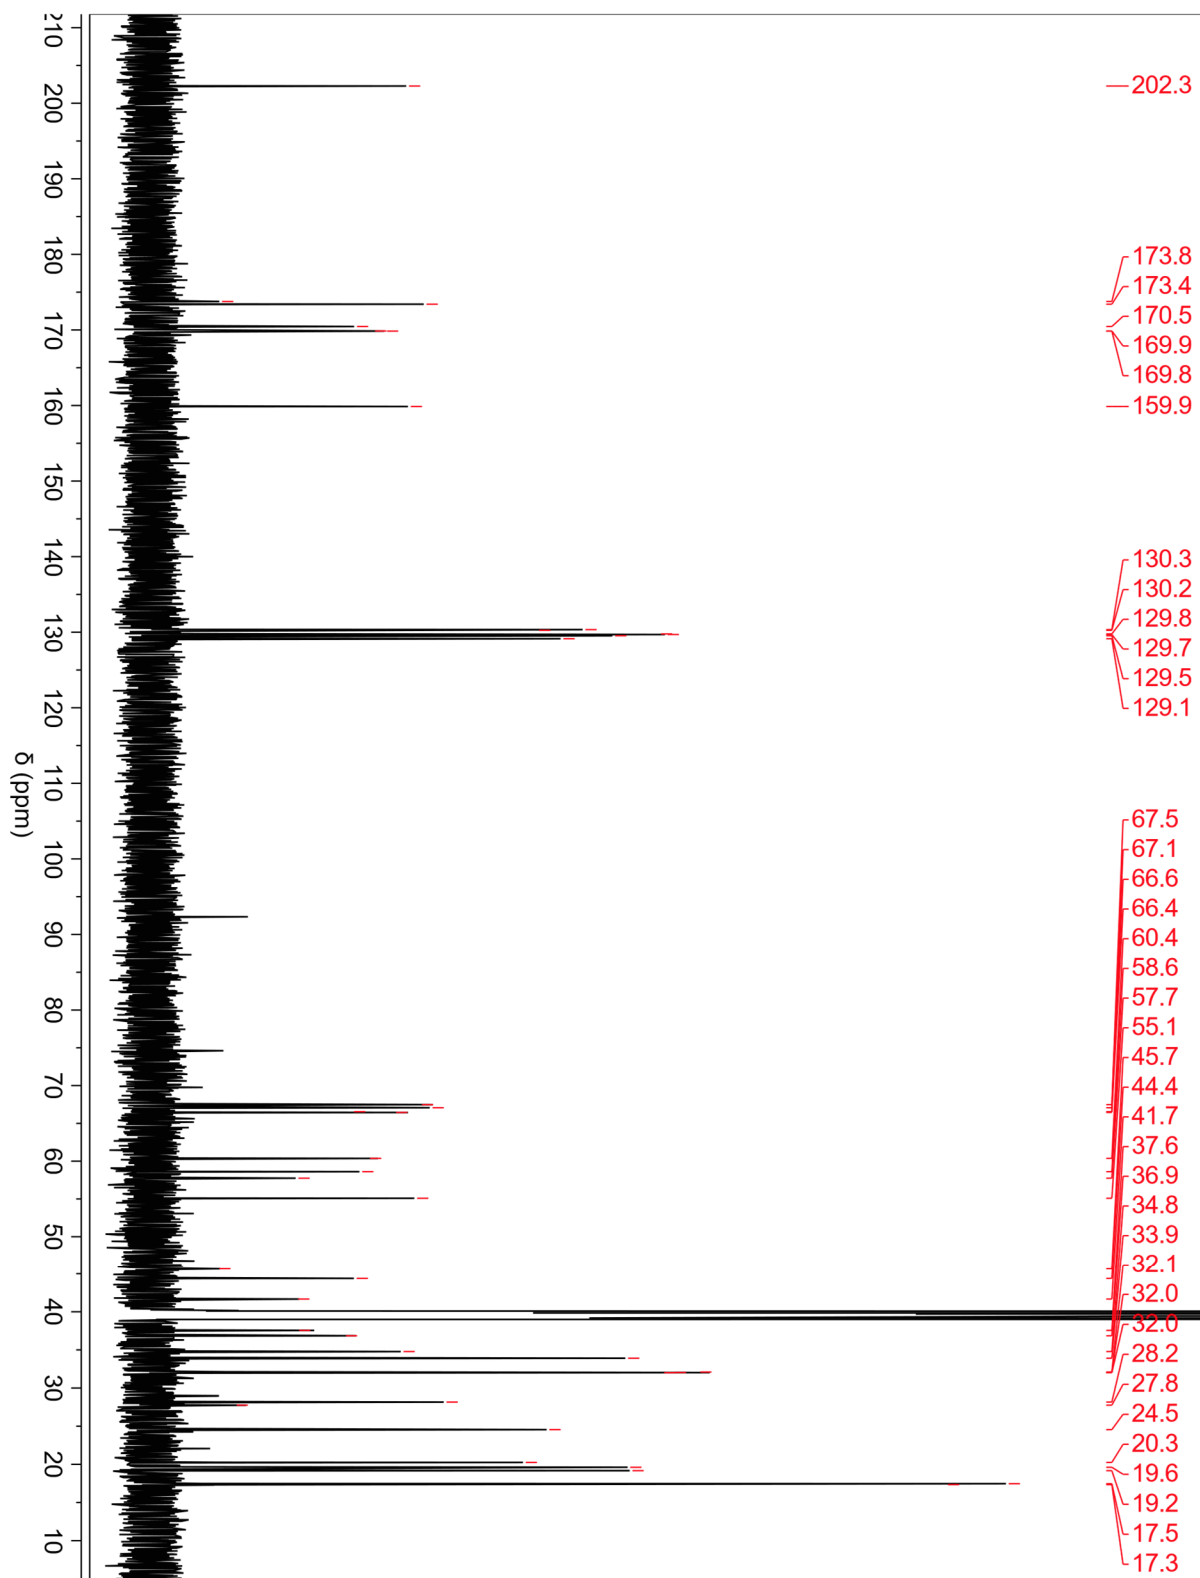

Figure S34.  $^{13}\text{C}$  NMR spectrum of megapolipeptin B (2) acquired in  $\text{DMSO-}d_6$  at 150 MHz.

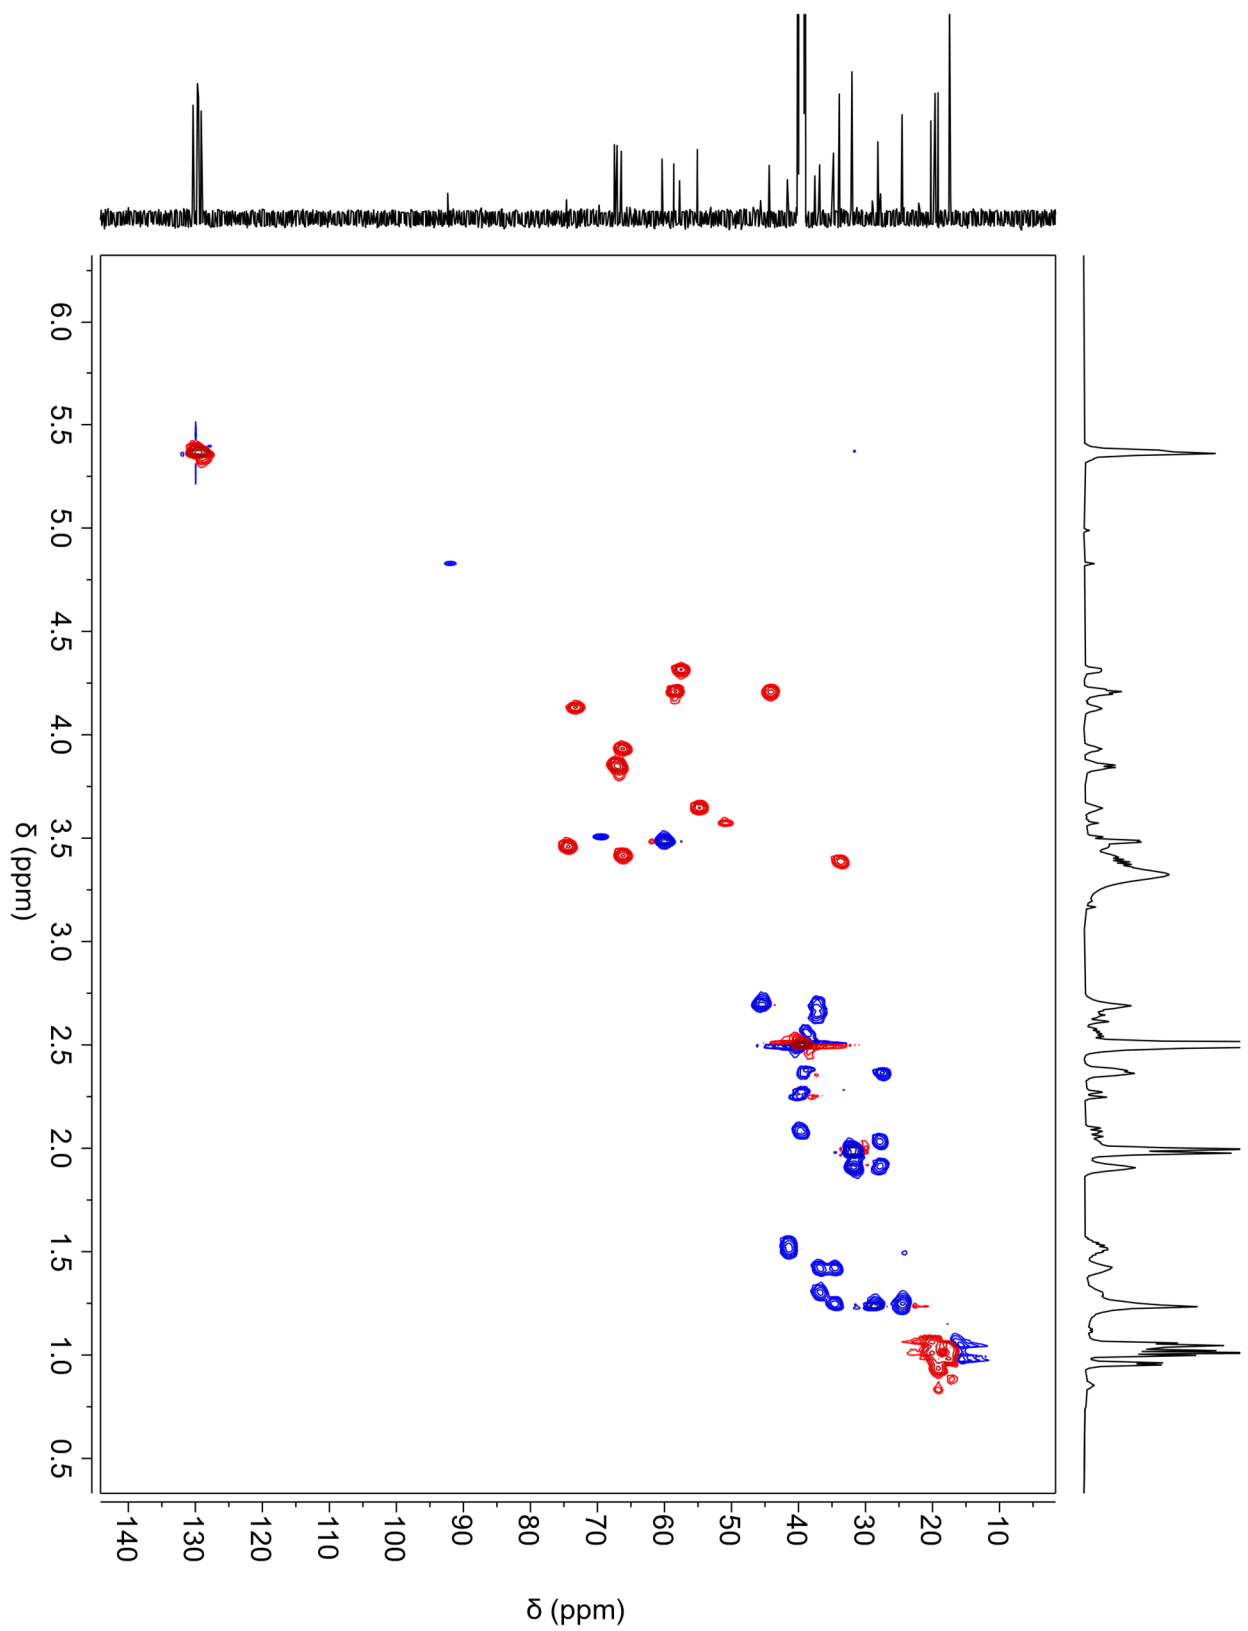

Figure S35. HSQC spectrum of megapolipeptin B (2) acquired in  $\text{DMSO-}d_6$  at 600 MHz.

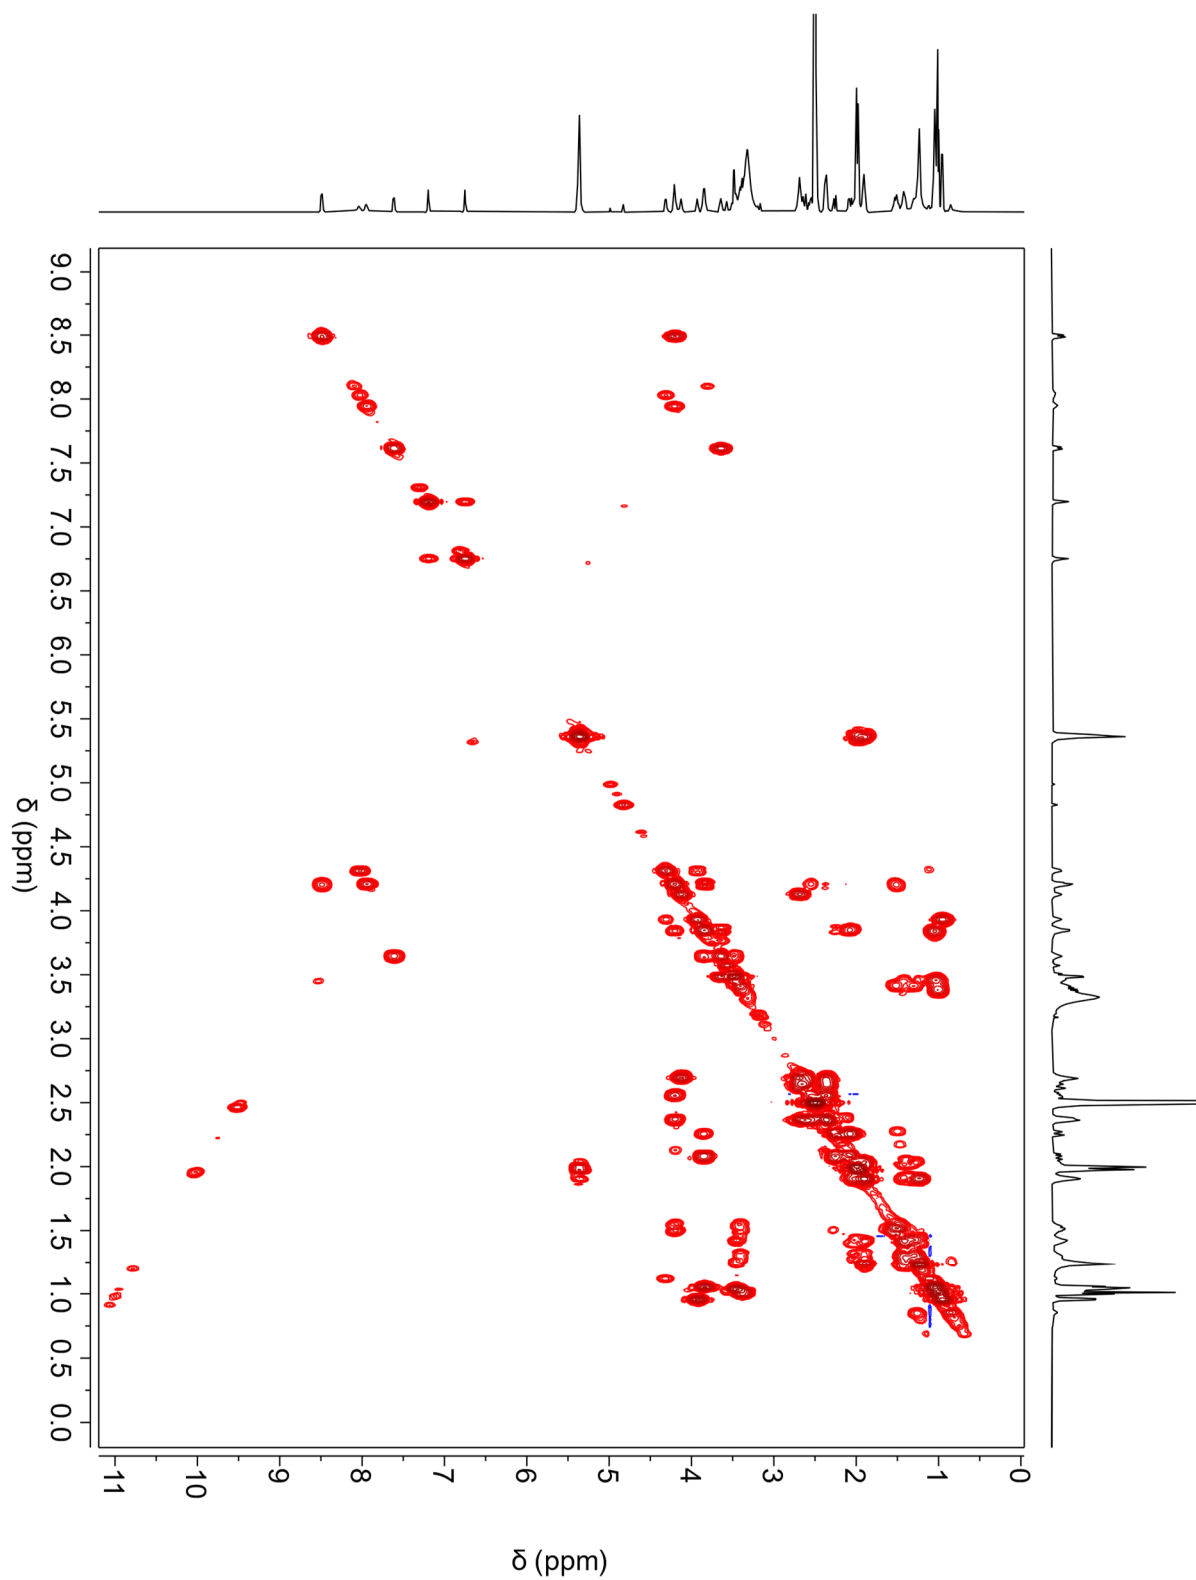

**Figure S36.**  $^1\text{H}$ - $^1\text{H}$  COSY spectrum of megapolipeptide B (2) acquired in  $\text{DMSO-}d_6$  at 600 MHz.

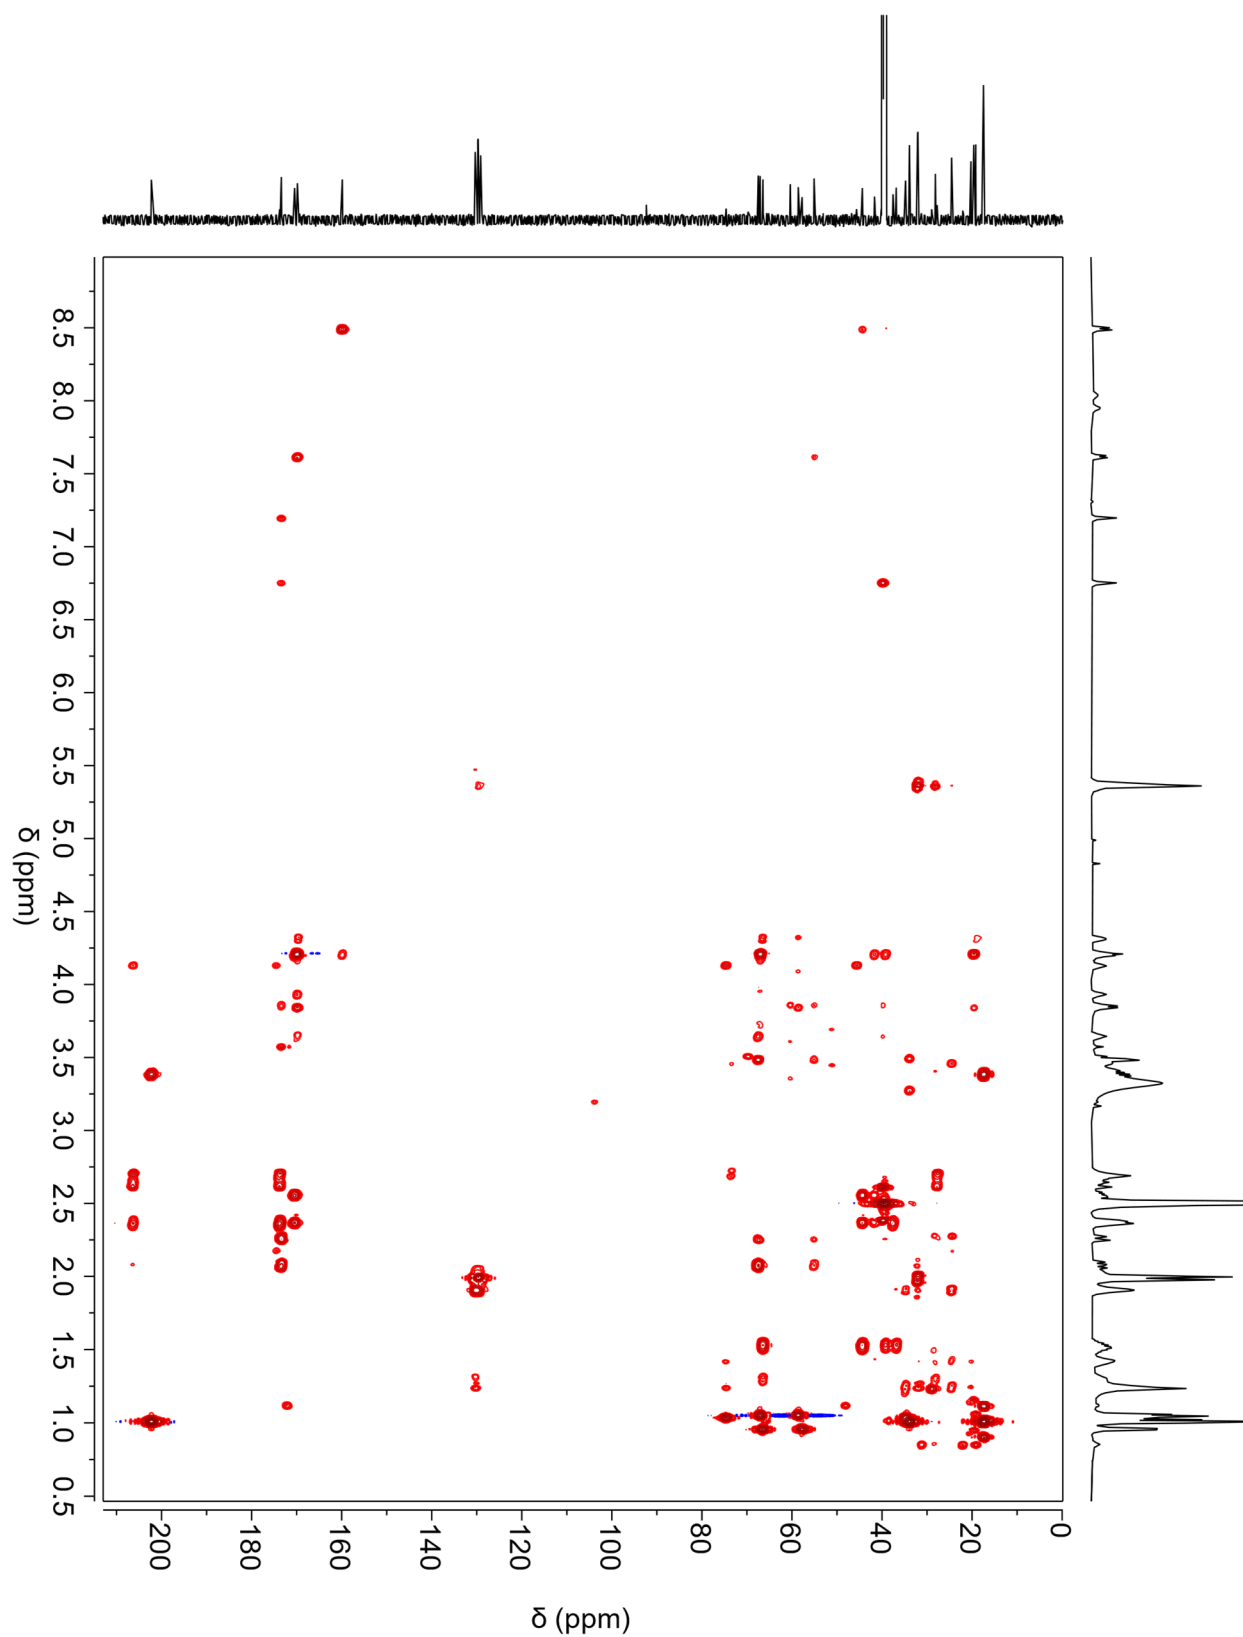

Figure S37. HMBC spectrum of megapolipeptin B (2) acquired in DMSO-*d*<sub>6</sub> at 600 MHz.

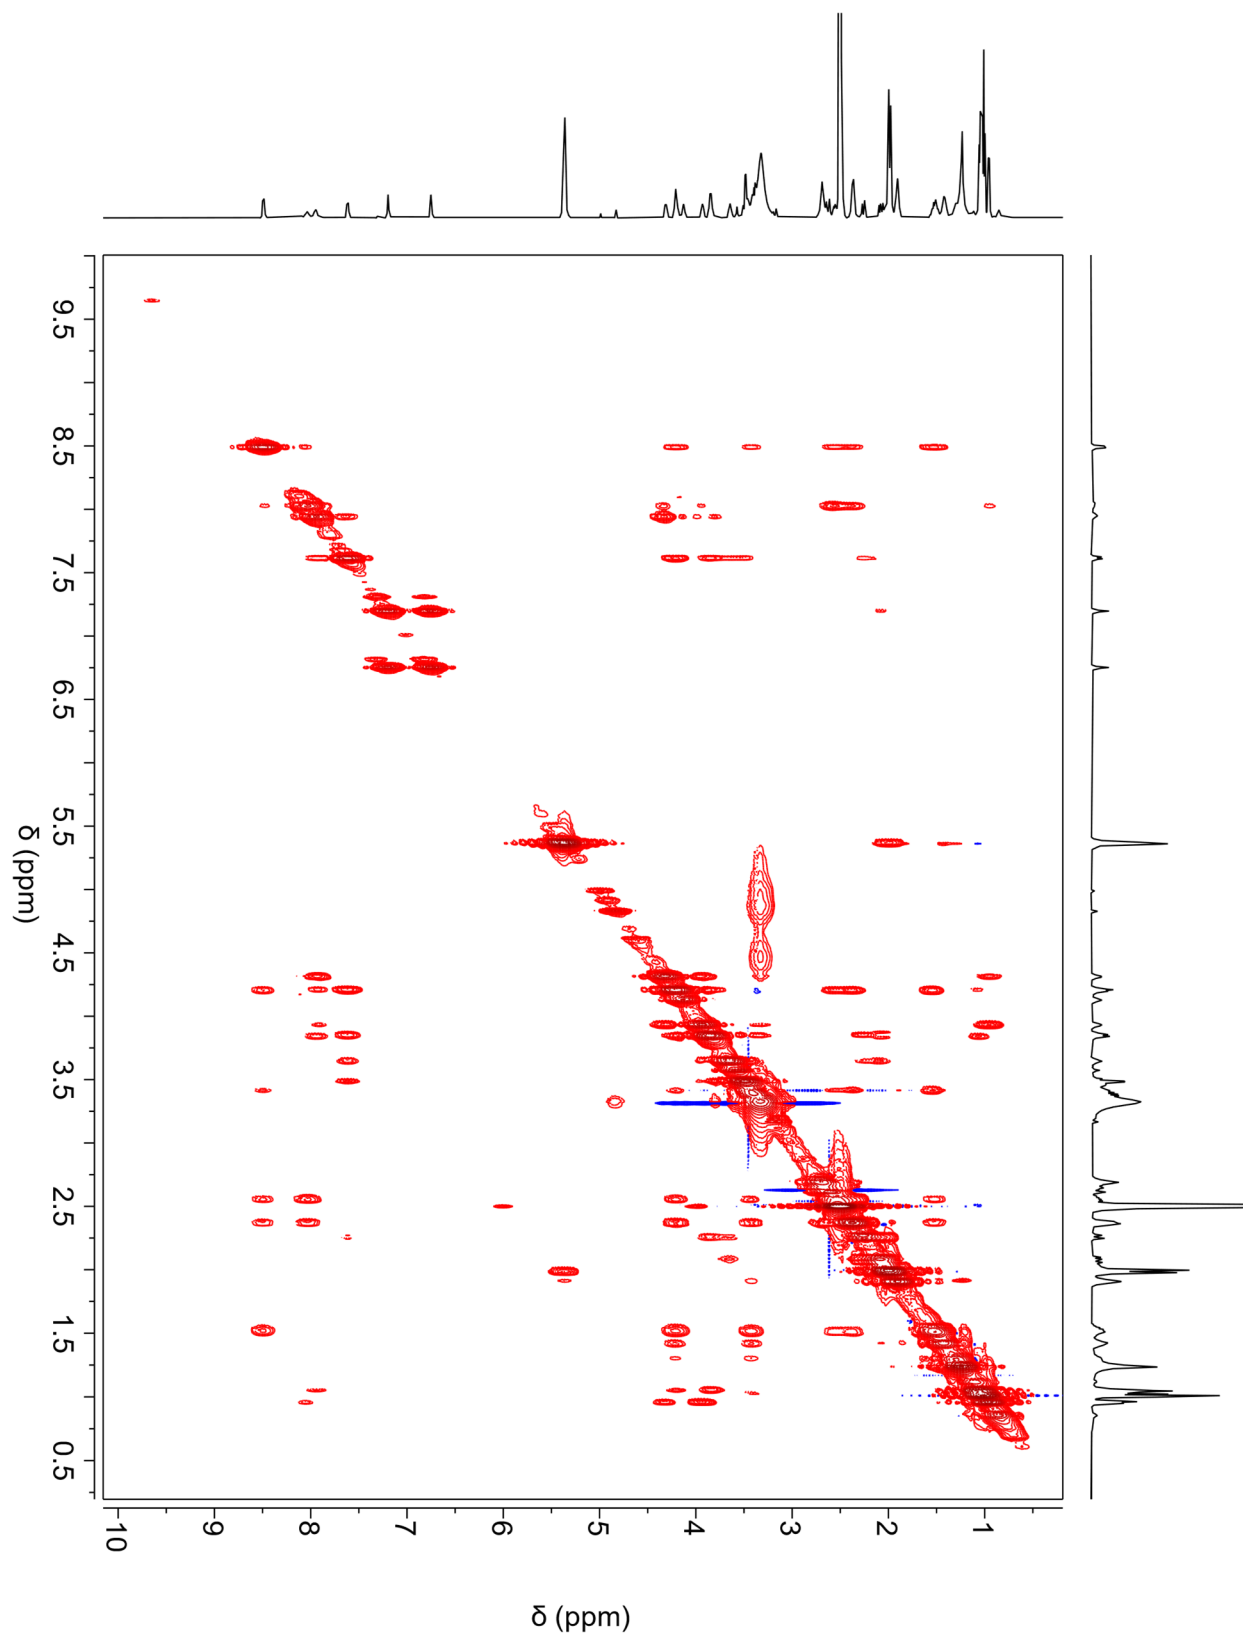

Figure S38. NOESY spectrum of megapolipeptin B (2) acquired in DMSO-*d*<sub>6</sub> at 600 MHz.

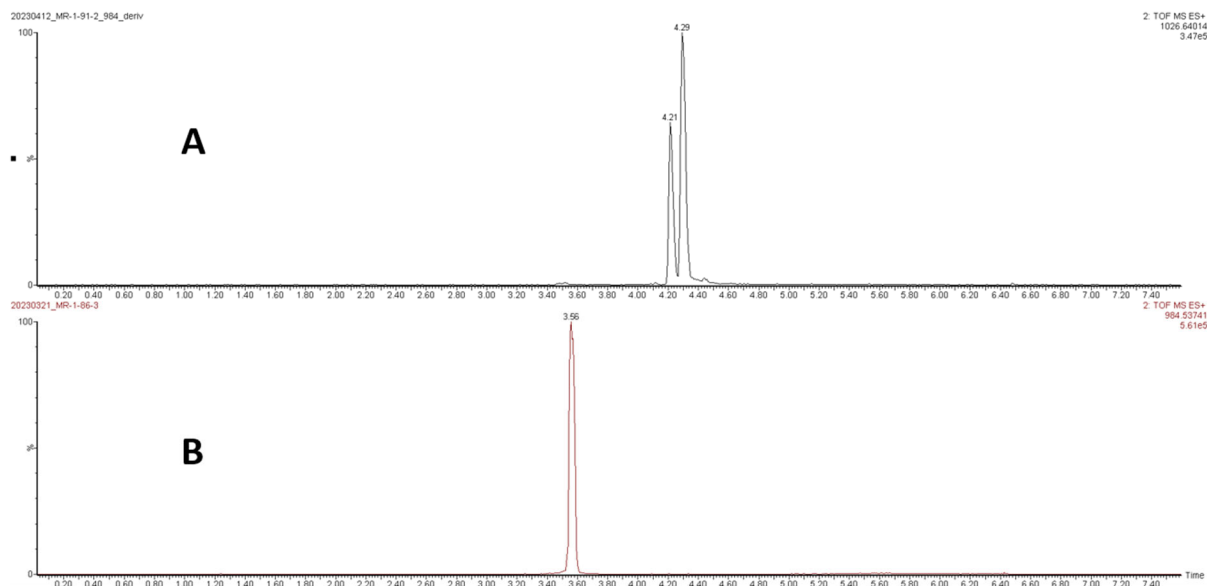

**Figure S39. Extracted ion chromatograms of megapolipeptin B (2) and methyl ester derivatives. (A) EIC of the megapolipeptin B (2) methyl ester derivatives. Two products were observed and isolated by HPLC. (B) EIC of purified megapolipeptin B (2).**

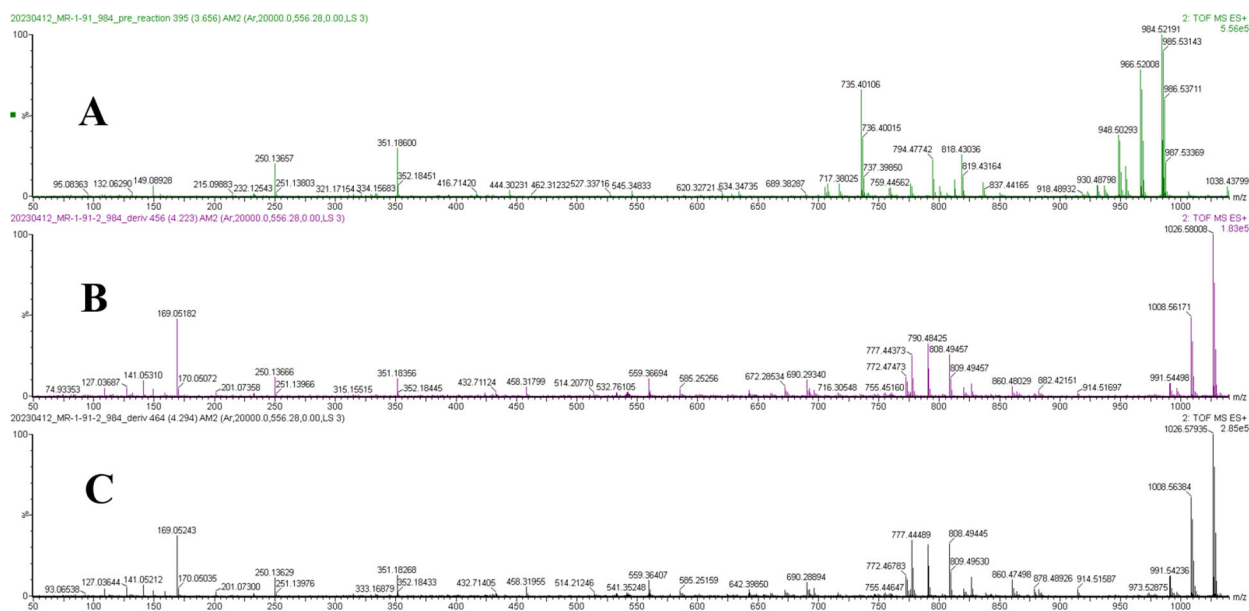

**Figure S40. Comparative MS spectra of megapolipeptin B (2) and methyl ester derivatives. (A) megapolipeptin B (2) and (B) and (C) the two megapolipeptin B (2) methyl ester derivatives (B: 5,  $t_R$  4.21 min; C: 6,  $t_R$  4.29 min).**

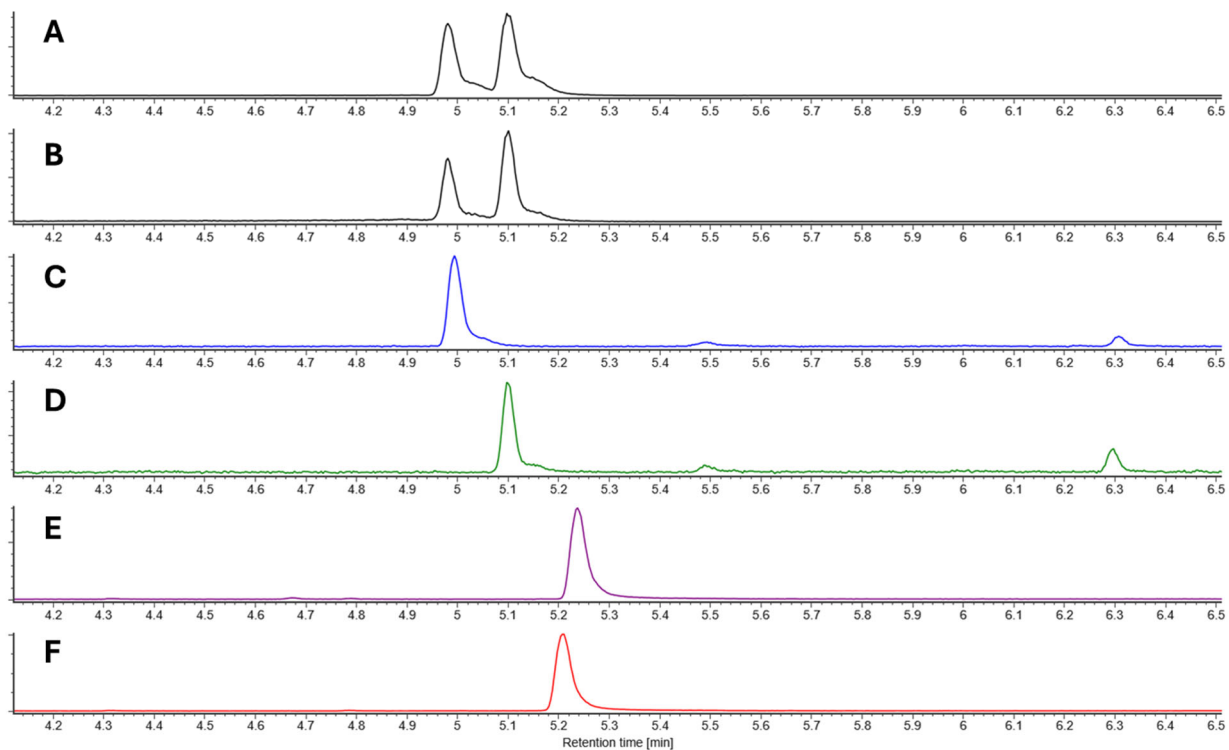

**Figure S41. Marfey's analysis of megapolipeptin A (1) and megapolipeptin B (2).** (A) EIC  $[M+H]^+$   $m/z$  400.15 of megapolipeptin A (1) hydrolysate. (B) EIC  $[M+H]^+$   $m/z$  400.15 of megapolipeptin B (2) hydrolysate. (C) FDVA-L-threonine standard. (D) FDVA-L-*allo*-threonine standard. (E) FDVA-D-*allo*-threonine standard. (F) FDVA-D-threonine standard.

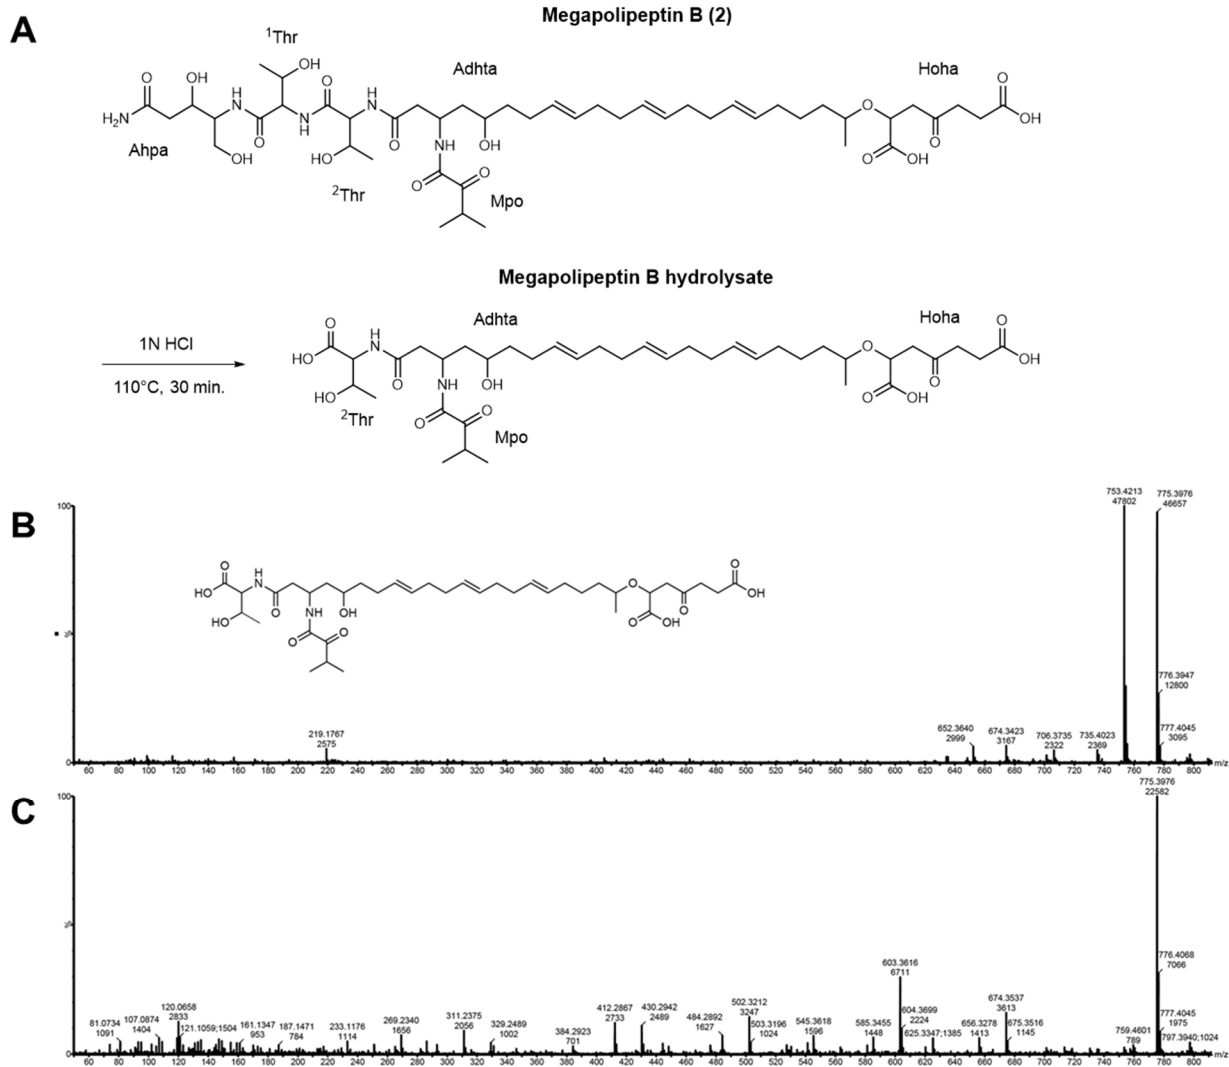

**Figure S42. Partial hydrolysis of megapolipeptin B (2).** (A) Reaction scheme. (B) MS<sup>1</sup> and (C) MS<sup>2</sup> spectra obtained for the hydrolysate product following partial hydrolysis of megapolipeptin B (2). The observed product peak ( $m/z$  753.4213) corresponds to the removal of the Ahpa and <sup>1</sup>Thr moieties, leaving a single threonine residue in the isolated fragment.



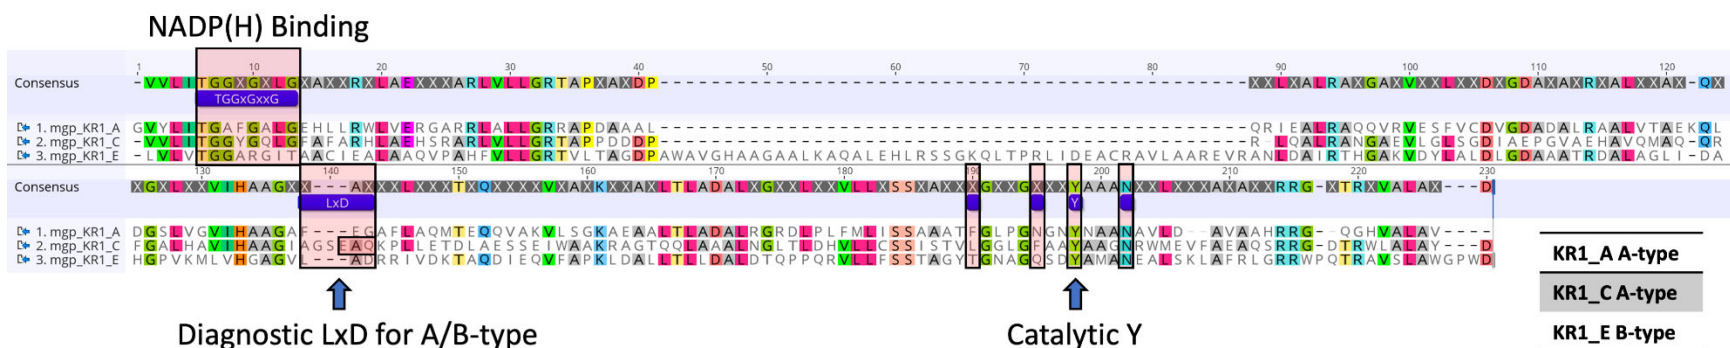

**Figure S43. Multiple sequence alignment of KR domains from the megapolipeptin BGC.** The NADP(H) binding motif GGxGxxG is highlighted in the first box from the top left. An analysis of the diagnostic Asp (D) presence within an LxD signature motif represented in the second box allows the classification of KR types in A-type or B-type. The presence of the catalytic Tyr (Y) indicates functionality for all KR domains<sup>21</sup>.

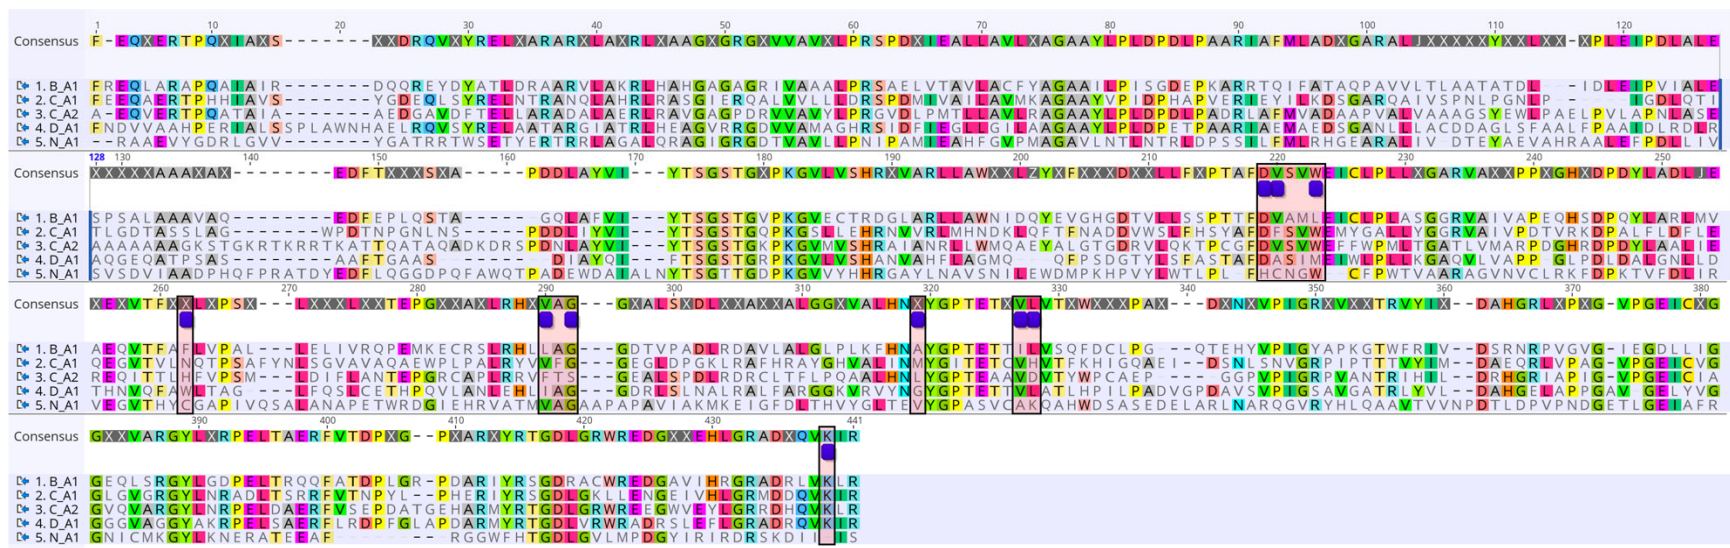

**Figure S44. Multiple sequence alignment of A domains from the megapolipeptin BGC.** The residues at positions 235, 236, 239, 278, 299, 301, 322, 330, 331, and 517 (highlighted in boxes) are responsible for amino acid selectivity<sup>17</sup>. See also **Table S13**.

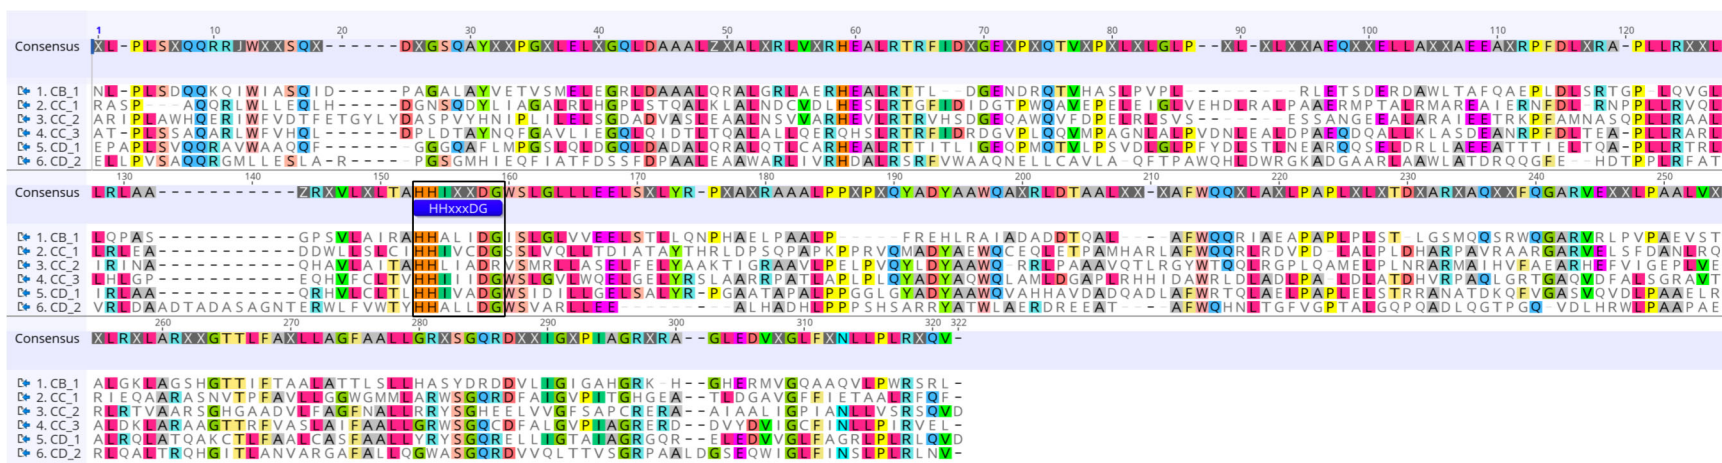

**Figure S45. Multiple sequence alignment of C domains from the megapolipeptin BGC.** The conserved motif **HHxxxDG** that includes the active site histidine is highlighted in a box<sup>22</sup>.

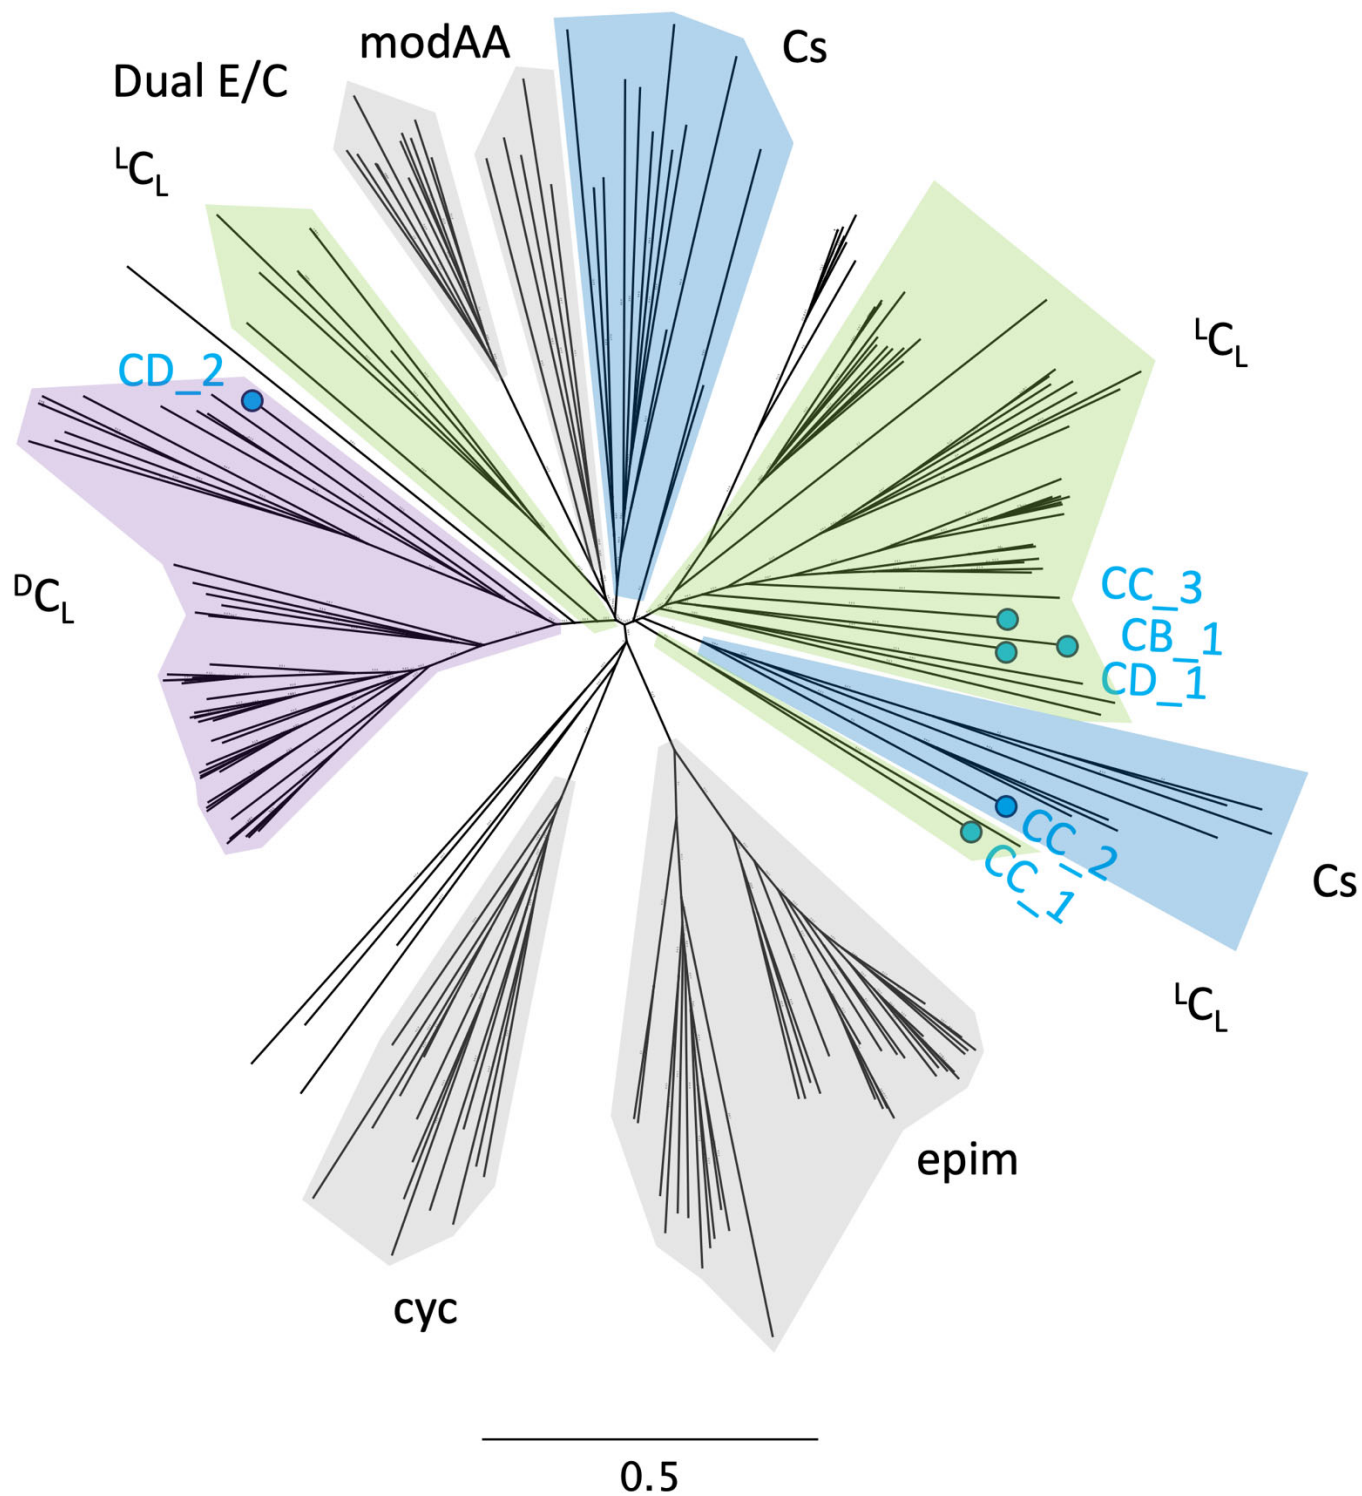

**Figure S46. Neighbor-Joining phylogenetic tree of 189 NRPS C domains.** Blue dots represent the six Mgp domains: MgpB1 (CB\_1), MgpC1 (CC\_1), MgpC2 (CC\_2), MgpC3 (CC\_3), and

MgpD1 (CD\_1). The phylogenetic tree was generated using Geneious Prime (2023.2.1) software with the JTT model of amino acid substitution. The scale bar represents the average number of amino acid substitutions. Cs, starter C domain; <sup>L</sup>CL, domains that catalyze formation of a peptide bond between two L-amino acids; <sup>D</sup>CL, C domain that condenses a D-amino acid donor with an L-amino acid acceptor; Cyc, cyclization domains that catalyze both peptide bond formation and subsequent cyclization of cysteine, serine or threonine residues; epim, epimerization domain; dual E/C, catalyzes epimerization and condensation; modAA, modified amino acid domains are involved in any modification of the incorporated amino acid, for example the dehydration of serine to dehydroalanine.



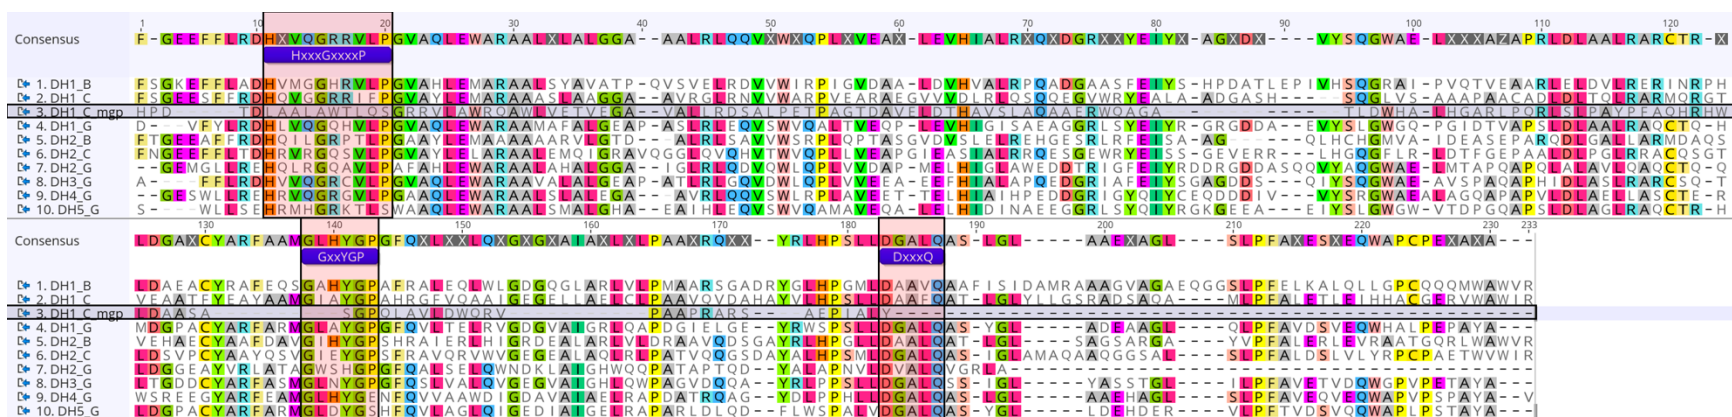

**Figure S47. Multiple sequence alignment of DH domains from the megapolipeptin BGC and lagriamide B BGC.** The catalytic D (DxxxQ/H, third box from the left) and H residues (HxxxGxxxxP, first box from the left) are not present in the DH domain from MgpC (sequence highlighted in grey), and neither is the conserved motif GxxYGP (second box) where the Y residue may aid in  $\beta$ -hydroxyl group binding. The alignment was generated using sequences of DH domains encoded in the lagriamide B biosynthetic gene cluster from *P. acidicola* RL17-338-BIF-B<sup>23</sup> to show the expected motifs.

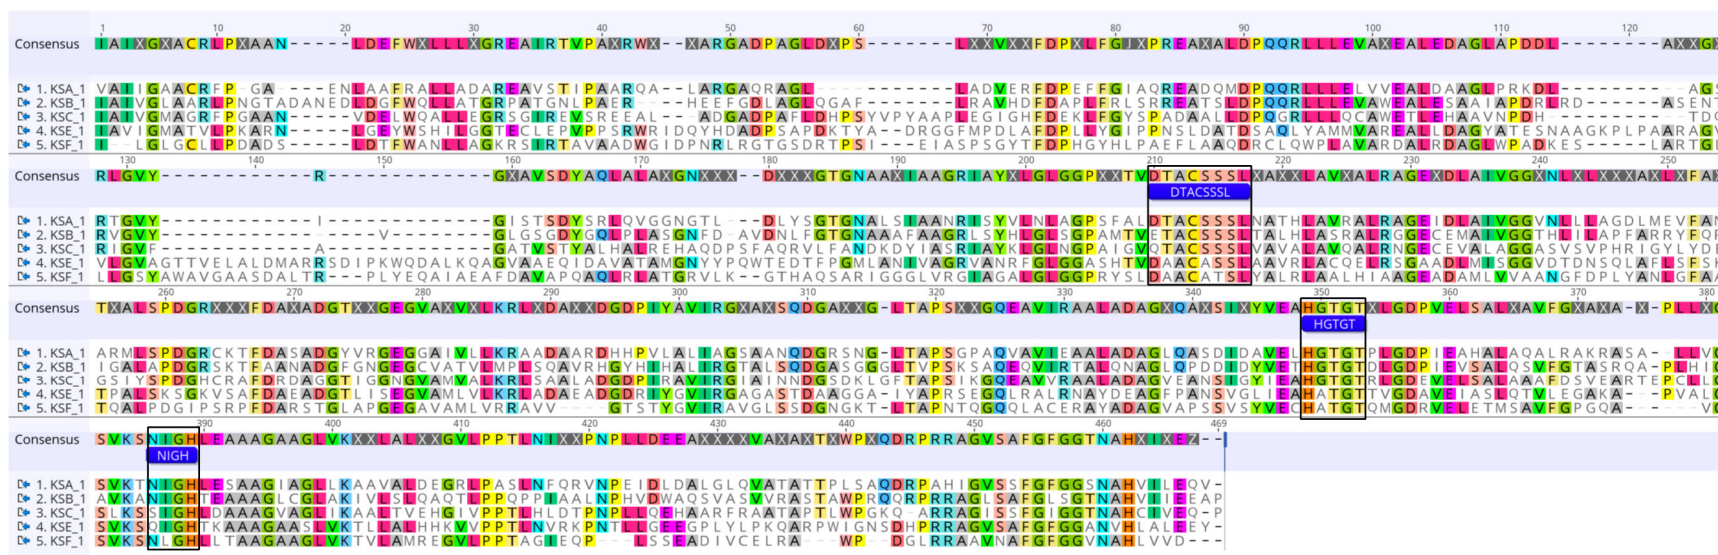

**Figure S48. Multiple sequence alignment of KS domains from the megapolipeptin BGC.** The conserved motifs that include the Cys-His-His catalytic triad (DTACSSSLV, HGTGT, NIGH) essential for decarboxylative condensation are highlighted in boxes<sup>21</sup>.

## REFERENCES

1. Wang, Z., Xiong, G. & Lutz, F. Site-specific integration of the phage  $\Phi$ CTX genome into the *Pseudomonas aeruginosa* chromosome: Characterization of the functional integrase gene located close to and upstream of *attP*. *Mol. Gen. Genet.* **246**, 72–79 (1995).
2. Wang, J. W. *et al.* CRISPR/Cas9 nuclease cleavage combined with Gibson assembly for seamless cloning. *Biotechniques* **58**, 161–170 (2015).
3. Gibson, Daniel. G. *et al.* Enzymatic assembly of DNA molecules up to several hundred kilobases. *Nat Methods* **6**, 343–345 (2009).
4. Montaser, R. & Kelleher, N. L. Discovery of the biosynthetic machinery for stravidins, biotin antimetabolites. *ACS Chem Biol* **15**, 1134–1140 (2020).
5. Wang, M. *et al.* Sharing and community curation of mass spectrometry data with global natural products social molecular networking. *Nat Biotechnol* **34**, 828–837 (2016).
6. Shannon, P. *et al.* Cytoscape: A software environment for integrated models of biomolecular interaction networks. *Gen Res* **13**, 2498–2504 (2003).
7. Hawkins, P. M. E., Liu, D. Y., Linington, R. G. & Payne, R. J. Solid-phase synthesis of coralmycin A/*epi*-coralmycin A and desmethoxycoralmycin A. *Org Biomol Chem* **19**, 6291–6300 (2021).
8. Tran, W. *et al.* Synthetic sansanmycin analogues as potent *Mycobacterium tuberculosis* translocase I inhibitors. *J Med Chem* **64**, 17326–17345 (2021).
9. Lee, S. *et al.* NP Analyst: An open online platform for compound activity mapping. *ACS Cent Sci* **8**, 223–234 (2022).
10. Hawkins, P. M. E. *et al.* Potent bactericidal antimycobacterials targeting the chaperone ClpC1 based on the depsipeptide natural products ecumicin and ohmyungsamycin A. *J Med Chem* **65**, 4893–4908 (2022).
11. Morehouse, N. J. *et al.* Tolypocaibols: Antibacterial lipopeptaibols from a *Tolypocladium* sp. endophyte of the marine macroalga *Spongomorpha arcta*. *J Nat Prod* **86**, 1529–1535 (2023).
12. Recchia, M. J. J., Baumeister, T. U. H., Liu, D. Y. & Linington, R. G. MultiplexMS: A mass spectrometry-based multiplexing strategy for ultra-high-throughput analysis of complex mixtures. *Anal Chem* **95**, 11908–11917 (2023).
13. Romanowski, S. B. *et al.* Identification of the lipodepsipeptide selethramide encoded in a giant nonribosomal peptide synthetase from a *Burkholderia* bacterium. *Proc Natl Acad Sci* **120**,

e2304668120 (2023).

14. Wilson, D. M. *et al.* Targeted sampling of natural product space to identify bioactive natural product-like polyketide macrolides. *Nat Commun* **15**, (2024).
15. McCulloch, M. W. B., Berrue, F., Haltli, B. & Kerr, R. G. One-pot syntheses of pseudopteroxazoles from pseudopterosins: A rapid route to non-natural congeners with improved antimicrobial activity. *J Nat Prod* **74**, 2250–2256 (2011).
16. Collins, L. A. & Franzblau, S. G. Microplate alamar blue assay versus BACTEC 460 system for high-throughput screening of compounds against *Mycobacterium tuberculosis* and *Mycobacterium avium*. *Antimicrob Agents Chemother* **41**, 1004–1009 (1997).
17. Stachelhaus, T., Mootz, H. D. & Marahiel, M. A. The specificity-conferring code of adenylation domains in nonribosomal peptide synthetases. *Chem Biol* **6**, 493–505 (1999).
18. Alonzo, D. A., Chiche-Lapierre, C., Tarry, M. J., Wang, J. & Schmeing, T. M. Structural basis of keto acid utilization in nonribosomal depsipeptide synthesis. *Nat Chem Biol* **16**, 493–496 (2020).
19. Arkin, A. P. *et al.* KBase: The United States department of energy systems biology knowledgebase. *Nat Biotechnol* **36**, 566–569 (2018).
20. Zheng, W. *et al.* Establishment of recombineering genome editing system in *Paraburkholderia megapolitana* empowers activation of silent biosynthetic gene clusters. *Microb Biotechnol* **13**, 397–405 (2020).
21. Keatinge-Clay, A. T. The structures of type I polyketide synthases. *Nat Prod Rep* **29**, 1050–1073 (2012).
22. Stachelhaus, T., Mootz, H. D., Bergendah, V. & Marahiel, M. A. Peptide bond formation in nonribosomal peptide biosynthesis: Catalytic role of the condensation domain. *J Biol Chem* **273**, 22773–22781 (1998).
23. Fergusson, C. H. *et al.* Discovery of a lagriamide polyketide by integrated genome mining, isotopic labeling, and untargeted metabolomics. *Chem Sci* **15**, 8089–8096 (2024).
